# Supplementary material for: Last-step 18F-fluorination of supported 2-(aryl-di-tert-butylsilyl)-N-methyl-imidazole conjugates for applications in positron emission tomography
Source: Royal Society of Chemistry journal article supplement (doi:10.1039/d2cc03258a), 2022-01-01

# **Last-Step $^{18}\text{F}$ -Fluorination of Supported 2-(Aryl-di-*tert*-Butylsilyl)-*N*-Methyl-Imidazoles Conjugates for Applications in Positron Emission Tomography.**

Marine Steffann,<sup>a,b</sup> Marion Tisseraud,<sup>a</sup> Guillaume Bluet,<sup>b</sup> Sebastien Roy,<sup>b</sup> Cathy Aubert,<sup>b</sup> Eric Fouquet,<sup>a</sup> and Philippe Hermange\*<sup>a</sup>

<sup>a</sup>*Univ. Bordeaux, Institut des Sciences Moléculaires, UMR-CNRS 5255, 351 Cours de la Libération, 33405 Talence Cedex, France.*

<sup>b</sup>*Integrated Drug Discovery (IDD) Isotope Chemistry (IC), 13 Quai Jules Guesde, 94400 Vitry-sur-Seine, France.*

*philippe.hermange@u-bordeaux.fr*

***Electronic Supplementary Information***

|                          |
|--------------------------|
| <b>Table of Contents</b> |
|--------------------------|

**A) Organic syntheses**

- a. General methods..... p3
- b. Syntheses of **1-6** and **PS-7**..... p3
- c. Syntheses of **PS-10a**, **PS-10b**, **PS-10c** and **PS-10d**..... p6
- d.  $^{19}\text{F}$ -Fluorination of supported precursors **PS-7** and **PS-10a-d**..... p8

**B) Radiosyntheses**

- a. General methods..... p13
- b. Optimization of the conditions and radiosyntheses of [ $^{18}\text{F}$ ]**11a**..... p13
- c. Radiosyntheses of [ $^{18}\text{F}$ ]**11d**, [ $^{18}\text{F}$ ]**11c** and [ $^{18}\text{F}$ ]**11d**..... p34

**C)  $^1\text{H}$ ,  $^{13}\text{C}$ ,  $^{29}\text{Si}$  and  $^{19}\text{F}$  NMR spectra.....p49**

## A) Organic syntheses

### a) General methods

All commercial materials were used without further purification, unless indicated.  $^1\text{H}$  NMR and  $^{13}\text{C}$  NMR were recorded on BRUKER AVANCE I 300 Mhz ( $^1\text{H}$ : 300MHz,  $^{13}\text{C}$ : 75.3MHz,  $^{19}\text{F}$ : 282.3 MHz,  $^{29}\text{Si}$ : 59.6 MHz), BRUKER AVANCE II 400 Mhz ( $^1\text{H}$ : 400MHz,  $^{13}\text{C}$ : 100.2 MHz,  $^{19}\text{F}$ : 376.3 MHz,  $^{29}\text{Si}$ : 79.5 MHz) or BRUKER AVANCE III 600 Mhz ( $^1\text{H}$ : 600MHz,  $^{13}\text{C}$ : 150.3 MHz,  $^{19}\text{F}$ : 564.5 MHz,  $^{29}\text{Si}$ : 119.2 MHz) spectrometers. The chemical shifts for the NMR spectra are reported in ppm relative to the solvent residual peak. Coupling constants  $J$  are reported in hertz (Hz). The following abbreviations are used for the multiplicities: s, singlet; d, doublet; t, triplet; q, quartet; qt, quintet; st, sextet; m, multiplet; br, broad; dd, doublet of doublet. Yields refer to isolated material determined to be pure by NMR spectroscopy and thin-layer chromatography (TLC), unless specified in the text. Analytical TLC was performed on Fluka Silica Gel 60 F254. High resolution mass spectra were performed by the CESAMO (Talence, France) and were recorded on Qq-TOF tandem mass spectrometer (API Q-STAR Pulsari, Applied Biosystems). Experiments under microwave irradiation were performed using a Biotage Initiator 2.5. UPLC coupled with mass were performed on an ACQUITY UPLC® using a Column ACQUITY UPLC® BEH C18 (1.7 $\mu\text{m}$ , 2.1 x 50mm) heated at 60°C. Samples were eluted with a flow of 0.5 mL/min using programs (eluent A =  $\text{H}_2\text{O}$  +  $\text{HCOOH}$  0.1% and eluent B = MeCN +  $\text{HCOOH}$  0.1%). The PDA detector was a SQD and the mass detector was a NOISE NRVP-B (INPUT: DC 12V 500 mA). The mass program was done in  $\text{ES}^+$  and  $\text{ES}^-$ , using  $m/z$ : 100-1000 or 200-2000, scan time 0.2, cone voltage 30 V, from 0 to 6 min.

### b) Syntheses of **1-6** and **PS-7**

#### 2-(Di-*tert*-butyl(4-(methoxymethoxy)phenyl)silyl)-1-methyl-1*H*-imidazole **1**

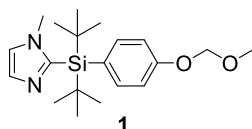

In a first flask (**flask 1**) under nitrogen, 1-methylimidazole (78 mg, 0.95 mmol, 1eq.) was dissolved in dry THF (0.5 mL) and a *n*-butyllithium solution (1.2M in hexane, 0.87 mL, 1.05 mmol, 1.2 mol/L, 1.1 eq.) was added at -80°C. Then, the reaction mixture was stirred at rt for 10 min.

At the same time, 1-bromo-4-(methoxymethoxy)benzene (315 mg, 1.45 mmol, 1.5eq.) was dissolved in dry THF (1 mL) in a second flask under nitrogen (**flask 2**), and a *n*-butyllithium solution (1.2M in hexane, 2.2 mL, 2.64 mmol, 2.7eq.) was added at -80°C. The reaction mixture was stirred at -80°C for 30 min and then 10 min at rt.

In a third flask (**flask 3**) under nitrogen, di-*tert*-butylsilanediyl bis(trifluoromethanesulfonate) (203 mg, 1.56 mmol, 1.7eq.) was dissolved in dry THF (2.5 mL) at room temperature and then cooled to -80°C. The reaction mixture of **flask 1** was slowly added by syringe in **flask 3** at -80°C before adding consecutively the reaction mixture of **flask 2** by syringe into **flask 3** at -80°C. The mixture of **flask 3** was stirred for 16h while being allowed to slowly return to rt. Then, the crude reaction mixture was concentrated under reduced pressure and purified by column chromatography on silica gel (cyclohexane/EtOAc: 90/10;  $R_f$  = 0.3) to obtain compound **1** (115 mg, 33%) as a brown powder.  $^1\text{H}$  NMR analysis was in accordance to the data previously reported:<sup>1</sup>  $^1\text{H}$  NMR (300 MHz,  $\text{CDCl}_3$ ) :  $\delta$  (ppm) 7.53 (d,  $J$  = 8.7 Hz, 2H), 7.32 (d,  $J$  = 0.8 Hz, 1H), 7.03 (d,  $J$  = 8.7 Hz, 2H), 6.99 (d,  $J$  = 1 Hz, 1H), 5.20 (s, 2H), 3.50 (s, 3H), 3.42 (s, 3H), 1.15 (s, 18H).

<sup>1</sup> M. Tisseraud, J. Schulz, D. Vimont, M. Berlande, P. Fernandez, P. Hermange and E. Fouquet, *Chem. Commun.*, 2018, **54**, 5098-5101.

## 2-(Di-tert-butyl(4-(methoxymethoxy)phenyl)silyl)-4,5-diiodo-1-methyl-1H-imidazole 2

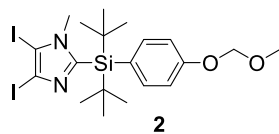

Under nitrogen, **1** (273 mg, 0.76 mmol, 1 eq.) was dissolved in acetonitrile (3 mL), and *N*-iodosuccinimide (513 mg, 2.28 mmol, 3 eq.) was added at room temperature. The reaction was stirred for 24h at 60°C. Then, the solvent was removed under reduced pressure and the residue was purified by column chromatography on silica gel (cyclohexane/CH<sub>2</sub>Cl<sub>2</sub> : 50/50 ; R<sub>f</sub> = 0.4 ) to give **2** (377 mg, 81%) as a yellow powder. <sup>1</sup>H NMR (300 MHz, CDCl<sub>3</sub>) : δ (ppm) 7.50 (d, *J* = 8.5 Hz, 2H), 7.04 (d, *J* = 8.7 Hz, 2H), 5.21 (s, 2H), 3.51 (s, 3H), 3.41 (s, 3H), 1.13 (s, 18H); <sup>13</sup>C NMR (75 MHz, CDCl<sub>3</sub>) : δ (ppm) 158.5, 154.6, 137.6 (2C), 126.0, 115.7 (2C), 97.5, 94.3, 86.6, 56.4, 40.2, 29.4 (6C), 20.9 (2C); <sup>29</sup>Si NMR (59 MHz, CDCl<sub>3</sub>) : δ (ppm) -5.24 ; HRMS (ESI/TOF<sup>+</sup>) : C<sub>20</sub>H<sub>30</sub>N<sub>2</sub>O<sub>2</sub>SiI<sub>2</sub> [M+Na]<sup>+</sup> calculated 635.0058, found 635.0081.

## 2-(Di-tert-butyl(4-(methoxymethoxy)phenyl)silyl)-4-iodo-1-methyl-1H-imidazole 3

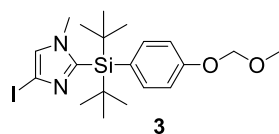

Under nitrogen, **2** (136 mg, 0.22 mmol, 1 eq.) was dissolved in dry THF (4 mL), a solution of ethylmagnesium bromide in Et<sub>2</sub>O (3.0 M, 81 μL, 0.24 mmol, 1.1 eq.) was added at 0°C. The reaction was stirred 30 min at 0°C. Saturated aqueous solution of ammonium chloride (20 mL) was added to quench the reaction and the aqueous layer was extracted three times with ethyl acetate (3x 20 mL). The combined organic layers were washed with brine (20 mL) and dried over sodium sulfate. The solvent was removed under reduced pressure and the residue was purified by column chromatography on silica gel (cyclohexane/ CH<sub>2</sub>Cl<sub>2</sub> : 50/50 ; R<sub>f</sub> = 0.3) to give **3** (102 mg, 95%) as a yellow oil. <sup>1</sup>H NMR (300 MHz, CDCl<sub>3</sub>) : δ (ppm) 7.50 (d, *J* = 8.7 Hz, 2H), 7.04 (s, 1H), 7.03 (d, *J* = 8.6 Hz, 2H), 5.20 (s, 2H), 3.50 (s, 3H), 3.39 (s, 3H), 1.14 (s, 18H); <sup>13</sup>C NMR (75 MHz, CDCl<sub>3</sub>) : δ (ppm) 158.4, 151.4, 137.6 (2C), 128.4, 126.5, 115.6 (2C), 94.3, 83.6, 56.3, 36.6, 29.4 (6C), 20.8 (2C); <sup>29</sup>Si NMR (59 MHz, CDCl<sub>3</sub>) : δ (ppm) -6.83; HRMS (ESI/TOF<sup>+</sup>) : C<sub>20</sub>H<sub>31</sub>N<sub>2</sub>O<sub>2</sub>SiI [M+Na]<sup>+</sup> calculated 509.1091, found 509.1108.

## 2-(Di-tert-butyl(4-(methoxymethoxy)phenyl)silyl)-4--(3-(benzyloxy)prop-1-ynyl)-1-methyl-1H-imidazole 4

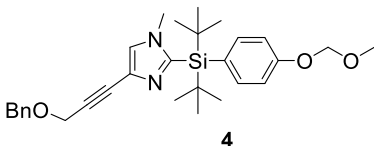

Under nitrogen, Pd(PPh<sub>3</sub>)<sub>4</sub> (6.9 mg, 6 μmol, 0.05 eq.), CuI (2.3 mg, 12 μmol, 0.1 eq.) and **3** (60 mg, 0.12 mmol, 1 eq.) were dissolved in dry DMF (2.5 mL). Triethylamine (0.6 mmol, 5 eq., 83.6 μL) and 1-(prop-2-ynyloxy)methylbenzene (52.6 mg, 0.36 mmol, 3 eq.) were added at room temperature. The reaction mixture was stirred at 80°C for 3h then water (20 mL) was added. The aqueous layer was extracted three times with diethyl ether (3x 20 mL), the combined organic layers were washed with brine (20 mL) and dried over magnesium sulfate. The solvent was removed under reduced pressure and the residue was purified by column chromatography on silica gel (cyclohexane/ CH<sub>2</sub>Cl<sub>2</sub>: 20/80 ; R<sub>f</sub> = 0.7) to give **4** (53.3 mg, 88%) as a colourless oil. <sup>1</sup>H NMR (300 MHz, CDCl<sub>3</sub>) : δ (ppm) 7.51 (d, *J* = 8.4 Hz, 2H), 7.40-7.30 (m, 5H), 7.19 (s, 1H), 7.04 (d, *J* = 8.1 Hz, 2H), 5.21 (s, 2H), 4.68 (s, 2H), 4.42 (s, 2H), 3.50 (s, 3H), 3.38 (s, 3H), 1.16 (s, 18H); <sup>13</sup>C NMR (75 MHz, CDCl<sub>3</sub>) : δ (ppm) 158.4, 149.3, 137.6 (2C), 128.5 (2C), 128.3 (2C), 127.9, 127.8, 126.6, 124.9, 115.5 (2C), 94.3, 84.9, 81.5, 71.7, 58.4, 56.3, 36.8, 29.4 (6C), 20.7 (2C); <sup>29</sup>Si NMR (59 MHz, CDCl<sub>3</sub>) : δ (ppm) -6.58; HRMS (ESI/TOF<sup>+</sup>) : C<sub>30</sub>H<sub>40</sub>N<sub>2</sub>O<sub>3</sub>Si [M+H]<sup>+</sup> calculated 505.2880, found 505.2896.

#### 4-(Di-*tert*-butyl(4-(3-hydroxypropyl)-1-methyl-1*H*-imidazol-2-yl)silyl)phenol **5**

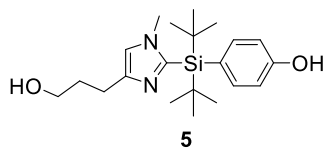

10% Palladium on carbon (69.5 mg, 50% w/w,) and acetic acid (80  $\mu$ L, 1.4 mmol, 10 eq.) were added to a solution of **4** (69.5 mg, 0.14 mmol, 1 eq.) in methanol (4 mL). The reaction mixture was placed under hydrogen atmosphere and stirred at room temperature for 16h. The crude reaction was filtered on celite and washed with methanol (20 mL).

The solvent was removed under reduced pressure. The residue was dissolved in methanol (4 mL) and an aqueous solution of sulfuric acid (6.2M, 0.22 mL, 1.4 mmol, 10 eq.) was added, and the reaction mixture was stirred at 50°C for 5h. Then, a saturated aqueous solution of NaHCO<sub>3</sub> (40 mL) was added. The mixture was extracted with ethyl acetate (3x 20 mL), the combined layers were dried over magnesium sulfate, the solvent was removed under reduced pressure and the residue was purified by column chromatography on silica gel (CH<sub>2</sub>Cl<sub>2</sub>/MeOH: 95/5) to give **5** (34.8 mg, 66%) as a white amorphous solid. <sup>1</sup>H NMR (300 MHz, MeOD) :  $\delta$  (ppm) 7.62 (d, *J* = 8.6 Hz, 2H), 7.09 (s, 1H), 7.03 (d, *J* = 8.5 Hz, 2H), 3.84 (t, *J* = 6.2 Hz, 2H), 3.57 (s, 3H), 2.91 (t, *J* = 6.9 Hz, 2H), 2.07 (m, 2H), 1.32 (s, 18H); <sup>13</sup>C NMR (75 MHz, MeOD) :  $\delta$  (ppm) 159.9, 148.7, 144.2, 138.7 (2C), 124.6, 121.7, 116.0 (2C), 62.8, 37.2, 33.3, 29.9 (6C), 25.5, 21.40 (2C); <sup>29</sup>Si NMR (59 MHz, MeOD) :  $\delta$  (ppm) -6.66; HRMS (ESI/TOF<sup>+</sup>) : C<sub>21</sub>H<sub>34</sub>O<sub>2</sub>N<sub>2</sub>Si [M+H]<sup>+</sup> calculated 375.2462, found 375.2465.

Monocrystals of this compound were obtained by slow evaporation from an AcOEt/toluene mixture. Crystallographic data was acquired at CESAMO (UMR 5255) on a Bruker APEX 2 DUO. A single crystal was mounted and immersed in a stream of nitrogen gas [*T* = 150(2) K]. Data were collected, using a microfocus sealed tube of Mo K $\alpha$  radiation (*k* = 0.71073 Å) on a KappaCCD diffractometer. Data collection and cell refinement were performed using APEX2 2013.10-0 (Bruker AXS Inc.), and SAINT v8.34A (Bruker AXS Inc.). Data reduction was performed using SAINT v8.34A (Bruker AXS Inc.). Correction for absorption was performed using multi-scan integration as included in SADABS V2012/1 (Bruker AXS). Structure solutions were found by charge flipping methods (SUPERFLIP (Palatinus & Chapuis, 2007) EDMA (Palatinus et al., 2012)) and refined with (SHELXL).<sup>2</sup> Crystallographic data for this structure has been deposited with the Cambridge Crystallographic Data Centre as supplementary publication no. CCDC 2169890. Copies of the data can be obtained, free of charge, on application to CCDC, 12 Union Road, Cambridge CB2 1EZ, UK, (fax: +44-(0)1223-336033 or e-mail: deposit@ccdc.cam.ac.uk)

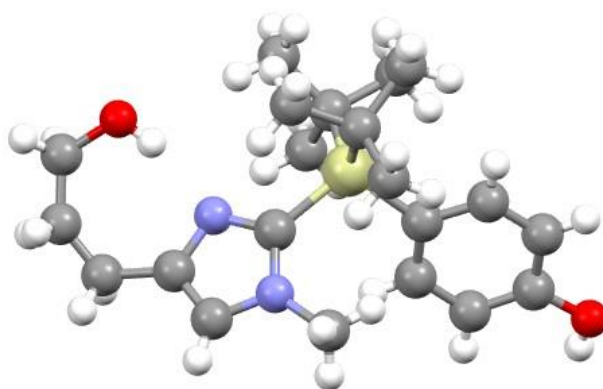

*Mercury drawing of the crystalline structure of **5** obtained by X-Ray diffraction analysis*

<sup>2</sup> G. M. Sheldrick *Acta Crystallographica Section A*. 2008, **64**, 112-122.

### 3-(2-((4-(2-(2-(2-(Prop-2-ynyloxy)ethoxy)ethoxy)ethoxy)phenyl)di-*tert*-butylsilyl)-1-methyl-1*H*-imidazol-4-yl)propan-1-ol 6

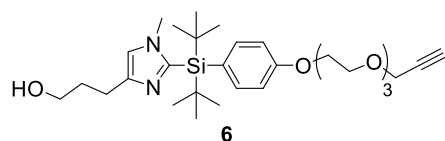

Potassium *tert*-butoxide (84.2 mg, 0.75 mmol, 1.5 eq.) and a solution of 2-(2-(2-(prop-2-ynyloxy)ethoxy)ethoxy)ethyl 4-methylbenzenesulfonate (257 mg, 0.75 mmol, 1.5 eq.) in dry THF (9 mL) were added to a solution of **5** (0.5 mmol, 161 mg) in dry THF (9 mL) at room temperature. The reaction mixture was stirred at room temperature for 72h. The solvent was removed under reduced pressure and the residue was purified by column chromatography on silica gel (CH<sub>2</sub>Cl<sub>2</sub>/Ethyl Acetate: 80/20) to give **6** as a colorless oil (218 mg, 80 %). <sup>1</sup>H NMR (300 MHz, CDCl<sub>3</sub>) : δ (ppm) 7.45 (d, *J* = 8.7 Hz, 2H), 6.85 (d, *J* = 8.7 Hz, 2H), 6.65 (s, 1H), 4.13 (d, *J* = 2.3 Hz, 2H), 4.08 (m, 2H), 3.81 (m, 2H), 3.73-3.66 (m, 4H), 3.63 (m, 6H), 3.26 (s, 3H), 2.75 (m, 2H), 2.35 (t, *J* = 2.2 Hz, 1H), 1.80 (m, 2H), 1.07 (s, 18H); <sup>13</sup>C NMR (75 MHz, CDCl<sub>3</sub>) : δ (ppm) 159.7, 147.5, 142.7, 137.4 (2C), 125.3, 120.2, 114.0 (2C), 79.6, 74.5, 70.8, 70.7, 70.5, 69.7, 69.1, 67.1, 62.6, 58.4, 36.7, 31.4, 29.3 (6C), 25.6, 20.5 (2C) ; <sup>29</sup>Si NMR (59 MHz, CDCl<sub>3</sub>) : δ (ppm) -6.78 ; HRMS (ESI/TOF<sup>+</sup>) : C<sub>30</sub>H<sub>47</sub>O<sub>5</sub>N<sub>2</sub>Si [M+H]<sup>+</sup> calculated 545.3405, found 545.3418.

### Polystyrene resin-Imidazole-SiFA-Alcyne PS-7

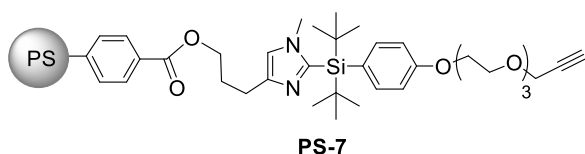

In sealed reactor of 10 mL, **6** (19 mg, 34.9 μmol, 1 eq.) was dissolved in toluene (2.5 mL) in the presence of benzoyl chloride polymer bound (2.1mmol/g, 100.3 mg, 150.5 μmol, 5eq). Triethylamine (50 μl, 358.72 μmol, 10 eq) and dimethylaminopyridine (10.3 mg, 84.31 μmol, 2.4 eq) were added to the reaction mixture. The reaction was stirred at 110°C for 3 days and the disappearance in the solution of **6** was monitored by TLC. After allowing the reaction mixture to cool at rt, the polymer was filtered on a sintered glass filter (porosity 4) and washed consecutively with methanol, water, dichloromethane and methanol. After drying under reduced pressure, polymer **PS-7** was recovered (92.7mg) and used without further treatment (theoretical loading: ≈0.36 mmol/g).

### *c) Syntheses of PS-10a, PS-10b, PS-10c and PS-10d*

#### Polystyrene resin-Imidazole-SiFA-Thymidine PS-10a

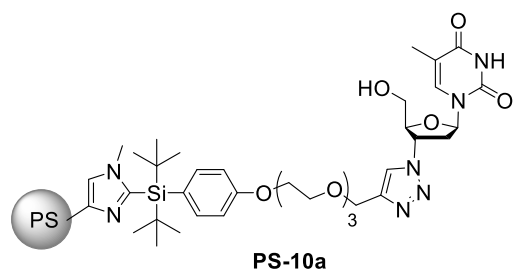

In sealed reactor of 5 mL, **PS-7** (95.6 mg, 36 μmol, 1 eq.), [Cu(Cl(TBTA))Cl·1.5H<sub>2</sub>O]<sup>3</sup> (33.7 mg, 50.7 μmol, 1.4 eq.) and (+)-sodium L-ascorbate (7 mg, 36 μmol, 1 eq.) were dissolved in DMF (1.5 mL). *N,N*-Diisopropylethylamine (60 μL, 345 μmol, 9.6 eq.) and zidovudine (AZT) (82 mg, 307 μmol, 8.5 eq.) were added in the reaction mixture. The reaction was heated at 100°C for 1h using micro-wave irradiation (30 W). After allowing the reaction mixture to cool at rt, the polymer was filtered on a sintered glass filter (porosity 4) and washed consecutively with DMF, water and methanol. After drying under reduced pressure, polymer **PS-10a** was recovered (85 mg) and used without further treatment (theoretical loading: ≈0.34 mmol/g).

<sup>3</sup> P. S. Donnelly, S. D. Zanatta, S. C. Zammit, J. M. White and S. J. Williams, *Chem. Commun.*, 2008, 2459-2461

### Polystyrene resin-Imidazole-SiFA-Glucose PS-10b

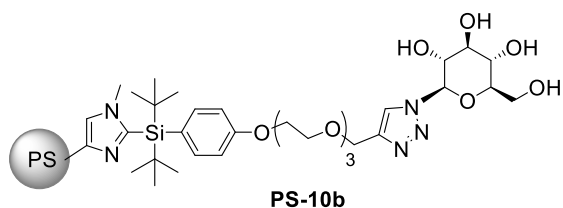

added in the reaction mixture. The reaction was heated at 70°C for 48h. After allowing the reaction mixture to cool at rt, the polymer was filtered on a sintered glass filter (porosity 4) and washed consecutively with DMF, water, acetonitrile and methanol. After drying under reduced pressure, polymer **PS-10b** was recovered (208 mg) and used without further treatment (theoretical loading:  $\approx 0.34$  mmol/g).

### Polystyrene resin-Imidazole-SiFA-Biotin PS-10c

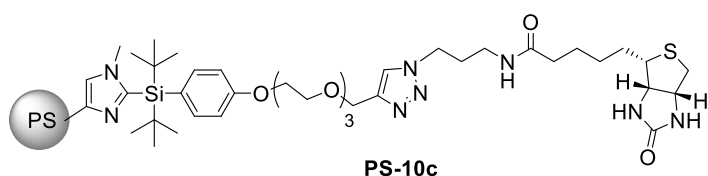

Diisopropylethylamine (120  $\mu$ L, 689  $\mu$ mol, 10 eq.) and 1-biotin-3-azidopropylamine (209 mg, 640  $\mu$ mol, 10 eq.) were added in the reaction mixture. The reaction was heated at 70°C for 48h. After allowing the reaction mixture to cool at rt, the polymer was filtered on a sintered glass filter (porosity 4) and washed consecutively with DMF, water, acetonitrile and methanol. After drying under reduced pressure, polymer **PS-10c** was recovered (188 mg) and used without further treatment (theoretical loading:  $\approx 0.32$  mmol/g).

### Polystyrene resin-Imidazole-SiFA-Estradiol PS-10d

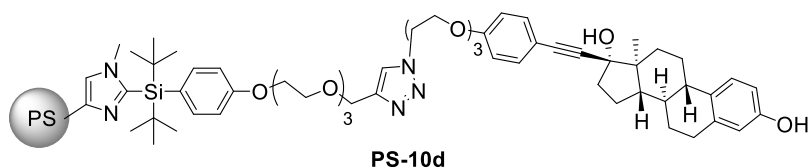

4.8 eq.) were dissolved in DMF (4.0 mL). *N,N*-Diisopropylethylamine (120  $\mu$ L, 689  $\mu$ mol, 8.5 eq.) and 2-(2-(2-azidoethoxy)ethoxy)ethyl-4-(ethynylestradiol)-phenolate<sup>4</sup> (308 mg, 564  $\mu$ mol, 7eq.) were added in the reaction mixture. The reaction was heated at 100°C for 1h using micro-wave irradiation (30 W). After allowing the reaction mixture to cool at rt, the polymer was filtered on a sintered glass filter (porosity 4) and washed consecutively with DMF, water, acetonitrile and methanol. After drying under reduced pressure, polymer **PS-10d** was recovered (220 mg) and used without further treatment (theoretical loading:  $\approx 0.30$  mmol/g).

In sealed reactor of 5 mL, **PS-7** (201 mg, 71  $\mu$ mol, 1 eq.), [Cu(Cl(TBTA)]Cl $\cdot$ 1.5H<sub>2</sub>O<sup>3</sup> (38.7 mg, 58.2  $\mu$ mol, 0.8eq.) and (+)-sodium L-ascorbate (23.4 mg, 118  $\mu$ mol, 1.7 eq.) were dissolved in DMF (4.0 mL). *N,N*-Diisopropylethylamine (120  $\mu$ L, 689  $\mu$ mol, 9.7 eq.) and 1-azido-1-deoxy- $\beta$ -D-glucopyranose (147 mg, 715  $\mu$ mol, 10 eq.) were

In sealed reactor of 5 mL, **PS-7** (180 mg, 64  $\mu$ mol, 1 eq.), [Cu(Cl(TBTA)]Cl $\cdot$ 1.5H<sub>2</sub>O<sup>3</sup> (37.3 mg, 56  $\mu$ mol, 0.8eq.) and (+)-sodium L-ascorbate (48 mg, 242  $\mu$ mol, 3.7 eq.) were dissolved in DMF (4.0 mL). *N,N*-

In sealed reactor of 5 mL, **PS-7** (218 mg, 81 $\mu$ mol, 1 eq.), [Cu(Cl(TBTA)]Cl $\cdot$ 1.5H<sub>2</sub>O<sup>3</sup> (29.7 mg, 44.7  $\mu$ mol, 0.55 eq.) and (+)-sodium L-ascorbate (77 mg, 389  $\mu$ mol,

<sup>4</sup> A. Tabey, H. Audrain, E. Fouquet and P. Hermange, *Chem. Commun.*, 2019, **55**, 7587-7590.

d) <sup>19</sup>F-Fluorination of supported precursors **PS-7** and **PS-10a-d**

**(4-(2-(2-(2-(Prop-2-ynoxy)ethoxy)ethoxy)ethoxy)phenyl)di-tert-butylfluorosilane 8**

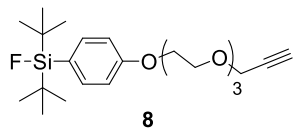

In a sealed reactor of 5 mL, polymer **PS-7** (24.4 mg,  $\approx 8.8 \mu\text{mol}$ ) was suspended in dry THF (0.8 mL) and a solution of aqueous hydrofluoric acid (0.1M, 110  $\mu\text{L}$ , 11  $\mu\text{mol}$ , 1.3 eq.) was added. The mixture was heated at 70°C for 2 h. The resin beads were filtered on a sintered glass filter (porosity 4) and washed with dichloromethane. The combined organic fractions were evaporated under reduced pressure to give **8** (4 mg, 9.43  $\mu\text{mol}$ , quantitative) as a white amorphous solid. <sup>1</sup>H NMR (300 MHz, CDCl<sub>3</sub>) :  $\delta$  (ppm) 7.50 (d,  $J$  = 8.5 Hz, 2H), 6.93 (d,  $J$  = 8.5 Hz, 2H), 4.20 (m, 2H), 4.15 (m, 2H), 3.87 (m, 2H), 3.77-3.67 (m, 8H), 2.42 (t,  $J$  = 2.4 Hz, 1H), 1.04 (d,  $J$  = 1.1 Hz, 18H); <sup>13</sup>C NMR (75 MHz, CDCl<sub>3</sub>) :  $\delta$  (ppm) 159.8, 135.9 (2C), 127.1, 113.9 (2C), 74.6, 71.0, 70.8, 70.6, 69.9, 69.3, 67.2, 58.6, 29.8 (6C), 28.2, 20.5 (2C); <sup>29</sup>Si NMR (59 MHz, CDCl<sub>3</sub>) :  $\delta$  (ppm) 14.3 (d,  $J$  = 296 Hz); <sup>19</sup>F NMR (282 MHz, CDCl<sub>3</sub>) :  $\delta$  (ppm) -188.72; HRMS (ESI/TOF<sup>+</sup>) : C<sub>23</sub>H<sub>37</sub>O<sub>4</sub>SiF [M+Na]<sup>+</sup> calculated 447.2337, found 447.2339.

**3'-Deoxy-3'-[4-((2-(2-(2-(4-(di-tert-butylfluorosilyl)phenoxy)ethoxy) ethoxy)ethoxy)methyl)-1H-1,2,3-triazol-1-yl]-thymidine 11a**

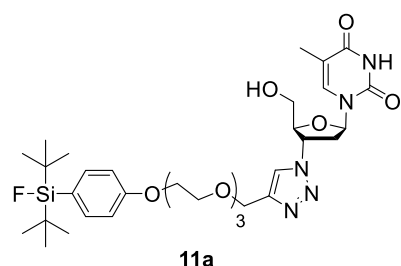

In a sealed reactor of 5 mL, polymer **PS-10a** (16 mg,  $\approx 5.4 \mu\text{mol}$ ) was suspended in dry THF (0.8 mL) and a solution of aqueous hydrofluoric acid (0.1M, 110  $\mu\text{L}$ , 11  $\mu\text{mol}$ , 2.0 eq.) was added. The mixture was heated at 70°C for 2 h. The resin beads were filtered on a sintered glass filter (porosity 4) and washed with dichloromethane. The combined organic fractions were evaporated under reduced pressure to give **11a** (2.0 mg, 2.9  $\mu\text{mol}$ , 54%) as a white amorphous solid. <sup>1</sup>H NMR analysis was in accordance to the data previously reported<sup>1</sup> and no traces of **8** was detected in the product. The sample purity was analysed by analytical UPLC/mass:  $t_{11a}$  = 3.34 min, [M+H]<sup>+</sup> found = 692.68. (Column ACQUITY UPLC® BEH C18 (1.7 $\mu\text{m}$ , 2.1 x 50mm) heated at 60°C with A = H<sub>2</sub>O + HCOOH 0.1% and B = MeCN + HCOOH 0.1% as eluents (0.5 mL/min, program: 10% of B (0 min)  $\rightarrow$  10% of B (0.1 min)  $\rightarrow$  100% of B (4.5 min)  $\rightarrow$  100% of B (5 min)  $\rightarrow$  10% of B (5.2 min)  $\rightarrow$  10% of B (6 min)); <sup>1</sup>H NMR (300 MHz, CDCl<sub>3</sub>) :  $\delta$  (ppm) 8.10 (s, 1H), 7.73 (s, 1H), 7.51 (d,  $J$  = 8.5 Hz, 2H), 7.37 (s, 1H), 6.92 (d,  $J$  = 8.6 Hz, 2H), 6.19 (t,  $J$  = 6.7 Hz, 1H), 5.39 (d,  $J$  = 6.1 Hz, 1H), 4.70 (s, 2H), 4.41 (d,  $J$  = 5.3 Hz, 1H), 4.15 (t,  $J$  = 4.8 Hz, 2H), 4.01 (d,  $J$  = 13.8 Hz, 1H), 3.87 (t,  $J$  = 4.8 Hz, 2H), 3.76-3.66 (m, 9H), 3.49 (s, 1H), 2.96-2.88 (m, 2H), 1.95 (d,  $J$  = 0.9 Hz, 3H), 1.03 (d,  $J$  = 0.9 Hz, 18H).



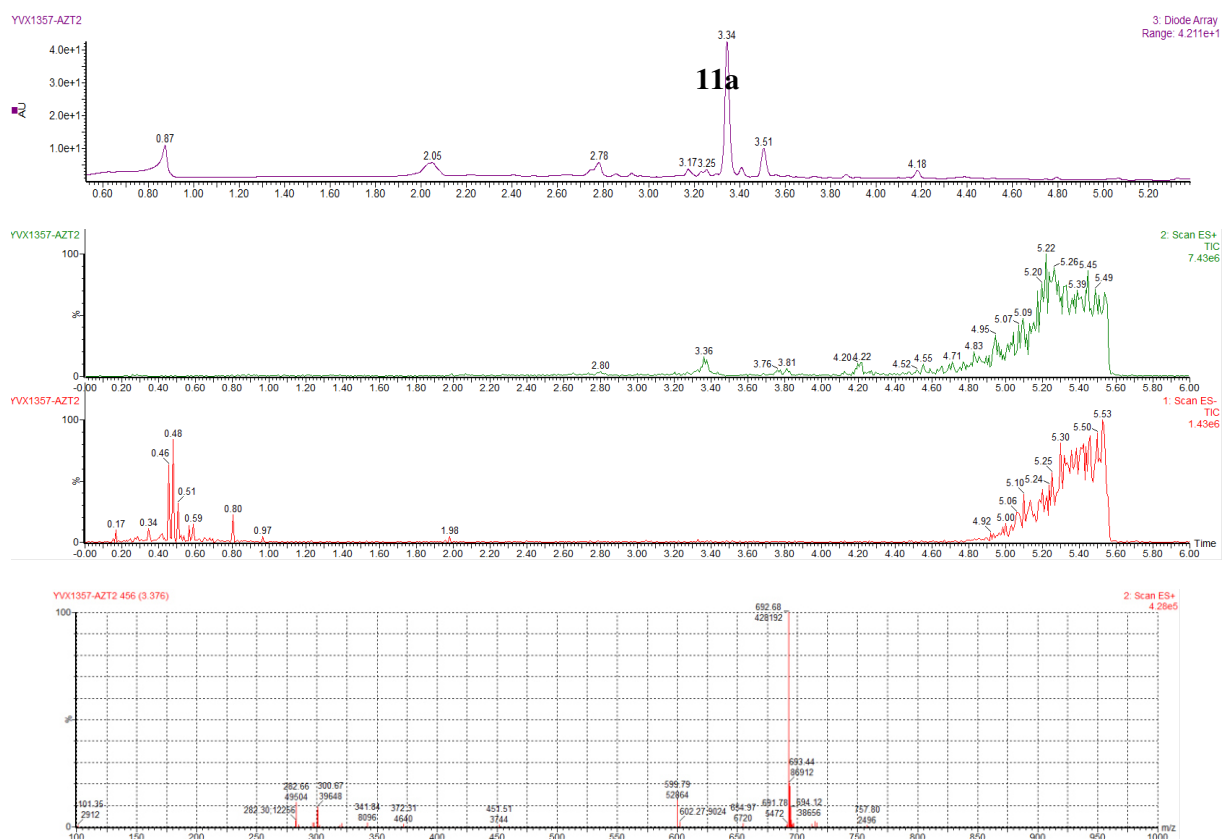

Analytic UPLC/mass chromatograms of 11a

**$\beta$ -D-1-Deoxy-1-[4-((2-(2-(2-(4-(di-tert-butylfluorosilyl)phenoxy)ethoxy)ethoxy)ethoxy)methyl)-1H-1,2,3-triazol-1-yl]-glucopyranose 11b**

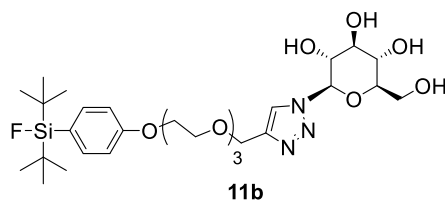

In a sealed reactor of 5 mL, polymer **PS-10b** (31.6 mg,  $\approx 10.7 \mu\text{mol}$ ) was suspended in dry THF (0.5 mL) and a solution of aqueous hydrofluoric acid (0.1M, 200  $\mu\text{L}$ , 20  $\mu\text{mol}$ , 1.9 eq) was added. The mixture was heated at 70°C for 2 h. The resin beads were filtered on a sintered glass filter (porosity 4) and washed with dichloromethane. The combined organic fractions were evaporated under reduced pressure to give **11b** (7.6 mg, 12  $\mu\text{mol}$ , 100%) as a white amorphous solid.  $^1\text{H}$  NMR analysis was in accordance to the data previously reported<sup>1</sup> and no traces of **8** was detected in the product. The sample purity was analysed by analytical UPLC/mass:  $t_{11a} = 3.10$  min,  $[\text{M}+\text{H}]^+$  found = 630.71. (Column ACQUITY UPLC® BEH C18 (1.7 $\mu\text{m}$ , 2.1 x 50mm) heated at 60°C with A =  $\text{H}_2\text{O}$  +  $\text{HCOOH}$  0.1% and B =  $\text{MeCN}$  +  $\text{HCOOH}$  0.1% as eluents (0.5 mL/min, program: 10% of B (0 min)  $\rightarrow$  10% of B (0.1 min)  $\rightarrow$  100% of B (4.5 min)  $\rightarrow$  100% of B (5 min)  $\rightarrow$  10% of B (5.2 min)  $\rightarrow$  10% of B (6 min));  $^1\text{H}$  NMR (600 MHz,  $\text{MeOD}$ ):  $\delta$  (ppm) 8.18 (s, 1H), 7.52 (d,  $J = 8.5$  Hz, 2H), 6.99 (d,  $J = 8.5$  Hz, 2H), 5.60 (d,  $J = 9.1$  Hz, 1H), 4.65 (s, 2H), 4.16 (t,  $J = 3.0$  Hz, 2H), 3.92-3.85 (m, 4H), 3.73-3.64 (m, 8H), 3.56-3.48 (m, 3H), 1.04 (d,  $J = 1.1$  Hz, 18H).

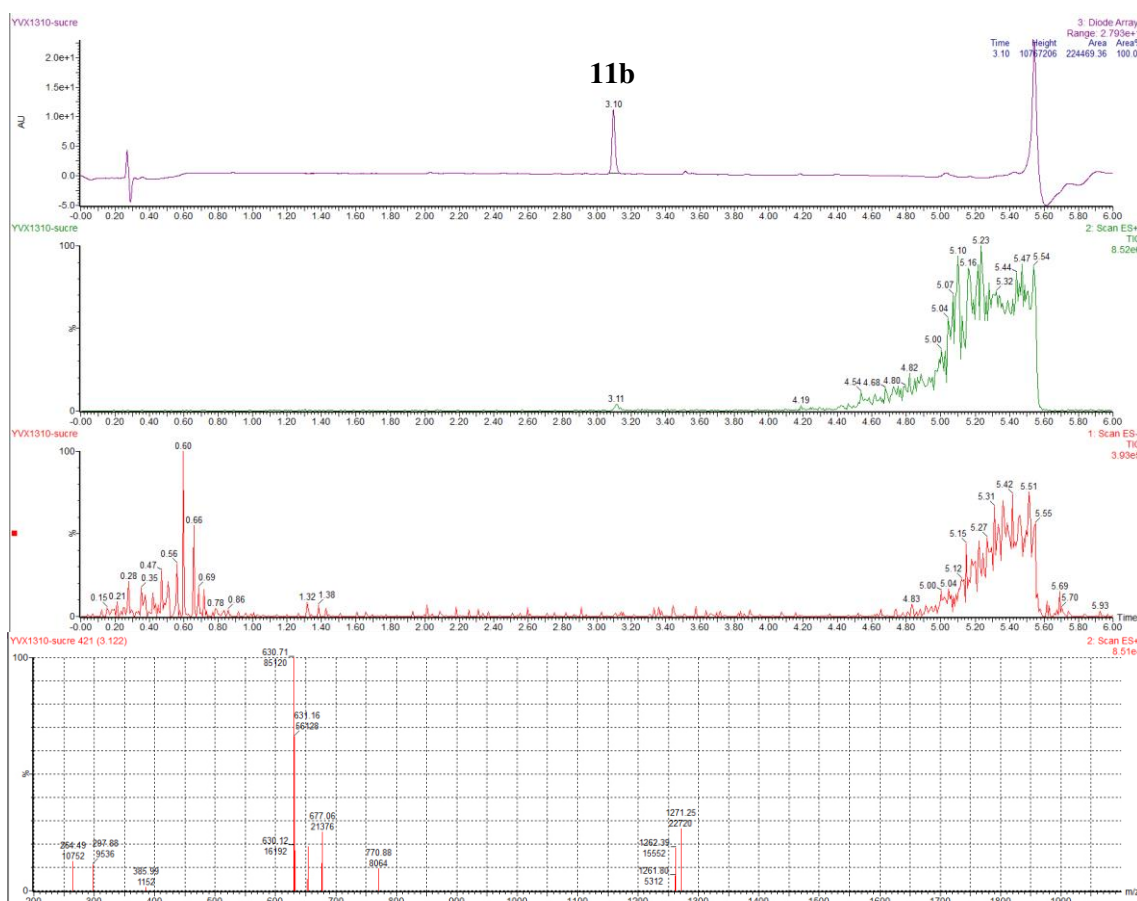

**Analytic UPLC/mass chromatograms of 11b**

**N-[3-(4-((2-(2-(2-(4-(di-tert-butylfluorosilyl)phenoxy)ethoxy)ethoxy)ethoxy)methyl)-1H-1,2,3-triazol-1-yl)propanyl]-biotinamide 11c**

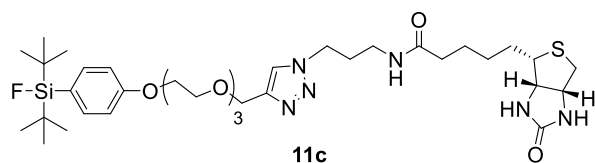

In a sealed reactor of 5 mL, polymer **PS-10c** (19.0 mg,  $\approx 6.1 \mu\text{mol}$ ) was suspended in dry THF (0.5 mL) and a solution of aqueous hydrofluoric acid (0.1M, 200  $\mu\text{L}$ , 20  $\mu\text{mol}$ , 3.3 eq) was added. The mixture was heated at 70°C

for 2 h. The resin beads were filtered on a sintered glass filter (porosity 4) and washed with dichloromethane. The combined organic fractions were evaporated under reduced pressure to give **11c** (5.0 mg, 6.6  $\mu\text{mol}$ , 100%) as a white amorphous solid.  $^1\text{H}$  NMR analysis was in accordance to the data previously reported<sup>1</sup> and no traces of **8** was detected in the product. The sample purity was analysed by analytical UPLC/mass:  $t_{11a} = 3.26$  min,  $[\text{M}+\text{H}]^+$  found = 751.75. (Column ACQUITY UPLC® BEH C18 (1.7 $\mu\text{m}$ , 2.1 x 50mm) heated at 60°C with A =  $\text{H}_2\text{O}$  +  $\text{HCOOH}$  0.1% and B = MeCN +  $\text{HCOOH}$  0.1% as eluents (0.5 mL/min, program: 10% of B (0 min)  $\rightarrow$  10% of B (0.1 min)  $\rightarrow$  100% of B (4.5 min)  $\rightarrow$  100% of B (5 min)  $\rightarrow$  10% of B (5.2 min)  $\rightarrow$  10% of B (6 min));  $^1\text{H}$  NMR (300 MHz, MeOD) : 8.04 (s, 1H), 7.52 (d,  $J = 8.5$  Hz, 2H), 6.98 (d,  $J = 8.5$  Hz, 2H), 4.62 (s, 2H), 4.48 (dd,  $J = 4.6$  Hz,  $J = 7.8$  Hz, 1H), 4.42 (t,  $J = 6.9$  Hz, 2H), 4.30 (dd,  $J = 4.3$  Hz,  $J = 7.8$  Hz, 1H), 4.16 (t,  $J = 3.1$  Hz, 2H), 3.85 (t,  $J = 4.6$  Hz, 2H), 3.71-3.66 (m, 8H), 3.20 (t,  $J = 3.9$  Hz, 3H), 2.90 (dd,  $J = 12.8$  Hz,  $J = 4.9$  Hz, 1H), 2.69 (d,  $J = 12.7$  Hz, 1H), 2.21 (t,  $J = 7.2$  Hz, 2H), 2.09 (qt,  $J = 6.6$  Hz, 3H), 1.45 (q,  $J = 1.5$  Hz, 2H), 1.04 (d,  $J = 1.0$  Hz, 18H).

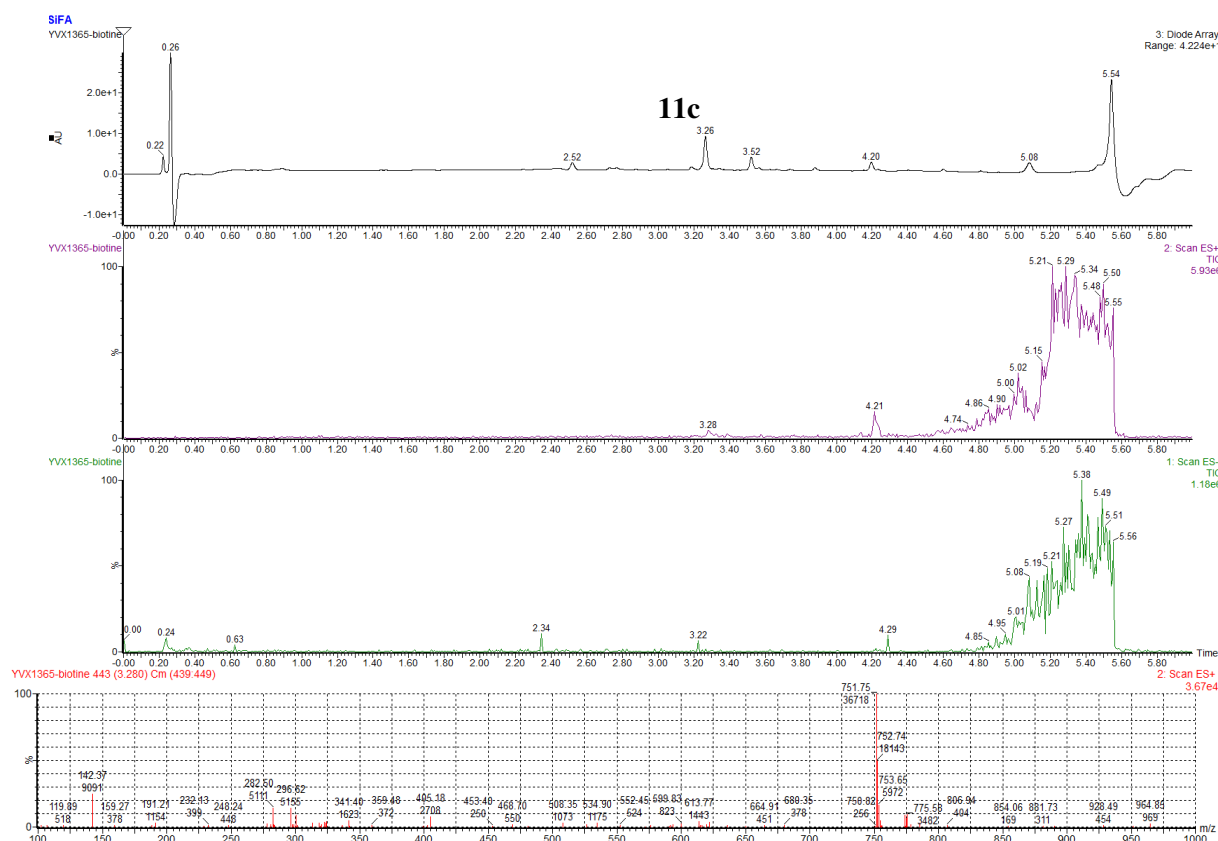

Analytic UPLC/mass chromatograms of **11c**

**17-(4-((2-(2-(2-(4-(di-tert-butylfluorosilyl)phenoxy)ethoxy)ethoxy)ethoxy)methyl))-1H-1,2,3-triazol-1-yl)ethoxy)ethoxy)ethoxy)phenyl)ethynyl)-estradiol 11d**

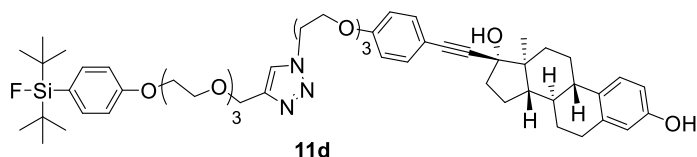

In a sealed reactor of 5 mL, polymer **PS-10d** (38.3 mg,  $\approx 11.5 \mu\text{mol}$ ) was suspended in dry THF (0.5 mL) and a solution of aqueous hydrofluoric acid (0.1M, 200  $\mu\text{L}$ , 20  $\mu\text{mol}$ , 1.7 eq) was

added. The mixture was heated at 70°C for 2 h. The resin beads were filtered on a sintered glass filter (porosity 4) and washed with dichloromethane. The combined organic fractions were evaporated under reduced pressure to give **11d** (7.0 mg, 7.2  $\mu\text{mol}$ , 63%) as a colorless oil. No traces of **8** was detected in the product by  $^1\text{H}$  NMR analysis. The sample purity was analysed by analytical UPLC/mass:  $t_{11d} = 4.16$  min,  $[\text{M}+\text{H}]^+$  found = 970.88. (Column ACQUITY UPLC® BEH C18 (1.7 $\mu\text{m}$ , 2.1 x 50mm) heated at 60°C with A =  $\text{H}_2\text{O}$  +  $\text{HCOOH}$  0.1% and B = MeCN +  $\text{HCOOH}$  0.1% as eluents (0.5 mL/min, program: 10% of B (0 min)  $\rightarrow$  10% of B (0.1 min)  $\rightarrow$  100% of B (4.5 min)  $\rightarrow$  100% of B (5 min)  $\rightarrow$  10% of B (5.2 min)  $\rightarrow$  10% of B (6 min));  $^1\text{H}$  NMR (600 MHz,  $\text{CDCl}_3$ ) :  $\delta$  (ppm) 7.49 (d,  $J = 8.1$  Hz, 2H), 7.36 (d,  $J = 8.5$  Hz, 2H), 7.16 (d,  $J = 8.4$  Hz, 1H), 6.91 (d,  $J = 8.2$  Hz, 2H), 6.84 (d,  $J = 8.6$  Hz, 2H), 6.62 (dd,  $J = 8.3$ ,  $J = 2.4$  Hz, 1H), 6.55 (d,  $J = 2.2$  Hz, 1H), 4.67 (slarge, 1H), 4.42 (dd,  $J = 10.3$  Hz,  $J = 4.2$  Hz, 1H), 4.29 (d,  $J = 10.4$  Hz, 1H), 4.13-4.10 (m, 4H), 3.87-3.61 (m, 12H), 2.75 (dd,  $J = 17.9$  Hz,  $J = 4.20$  Hz, 1H), 2.41-2.34 (m, 2H), 2.29-2.18 (m, 1H), 2.10-2.06 (m, 2H), 1.98-1.74 (m, 13H), 1.50-1.41 (m, 3H), 1.36-1.32 (m, 2H), 1.03 (s, 18H), 0.92 (s, 3H);  $^{13}\text{C}$  NMR (150.3 MHz,  $\text{CDCl}_3$ ) : 159.9, 158.6, 153.3, 138.2, 135.4 (d,  $J = 4.0$  Hz, 2C), 133.1(2C), 132.6, 127.8, 126.5, 124.6 (d,  $J = 12.1$  Hz, 2C), 115.4, 115.2, 114.5 (2C), 113.9(2C), 112.7, 91.5, 85.6, 80.3, 75.6, 70.7, 70.6, 70.5, 70.5, 69.8, 69.6, 69.2, 67.6, 67.4, 67.0, 49.7, 47.6, 43.6, 39.4, 39.0, 37.7, 33.0, 29.6, 27.9, 27.3 (6C), 27.2, 26.5, 22.9, 20.3 (d,  $J = 12.5$  Hz, 2C), 12.9;  $^{19}\text{F}$  NMR (282 MHz,  $\text{CDCl}_3$ ) :  $\delta$  (ppm) 188.66;  $^{29}\text{Si}$  NMR (59 MHz,  $\text{CDCl}_3$ ) :  $\delta$  (ppm) 14.39 (d,  $J = 296.6$  Hz); HRMS (ESI/TOF) :  $\text{C}_{55}\text{H}_{76}\text{O}_9\text{N}_3\text{F}_1\text{Si}_1$   $[\text{M}+\text{Na}]$  calculated 992.52271 found 992.52420.

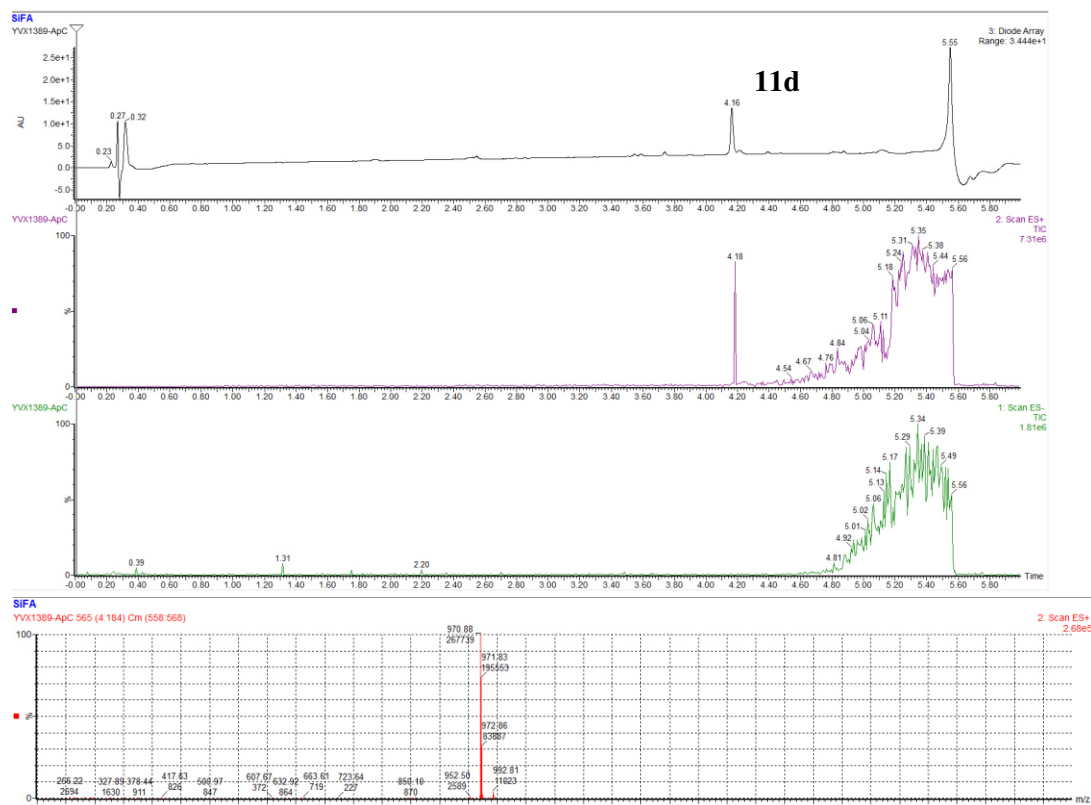

**Analytic UPLC/mass chromatograms of 11d**

## B) Radiosyntheses

### a. General methods

No-carrier added [ $^{18}\text{F}$ ]Fluoride was produced by the CEA in Paris via the  $^{18}\text{O}(\text{p},\text{n})^{18}\text{F}$  nuclear reaction, and directly delivered as a  $\text{H}_2[^{18}\text{O}]\text{O}$  solution (2-5mL). All radiosyntheses were performed in a lead-shielded Trasis hotcell<sup>®</sup> H2000 using an automated TRASIS PET Tracer synthesizer (AllinOne<sup>®</sup> module with 36 actuators, up to 5 syringe drivers, 2 heaters and a cartridge heater). The pressures of nitrogen and vacuum were monitored in real time. The AllinOne<sup>®</sup> module is equipped with a built-in HPLC with DAD and radioactivity detectors. The synthesizer was controlled using the Trasis Supervision<sup>®</sup> software version 2.30. Before each radiosynthesis, careful control of electronics and cassette was performed in order to avoid remote and leak issues. The purification was performed on C18 Sep-Pak cartridge (Waters) pre-conditioned according the following procedure: 100% A->20% B (5mL) -> 20% B (2mL) -> 40% B (2 mL) -> 60% B (2 mL) -> 80% B (2mL)-> 100% B (2 mL) with A = acetonitrile and B = water. The radiochemical purity was determined using an analytical radio-HPLC equipped with a Shimadzu pump ( LC-20A), a 20 $\mu\text{L}$  injection loop (SIL-20AC) and a Luna C18 column (5 $\mu\text{m}$ , 250x4.6mm) inside a column oven (CTO-20AC). The detection was performed using a UV detector with variable wavelength from Shimadzu (SPD-20A) and a gamma detector from Raytest. A Capintech INC CRC<sup>®</sup> 25PET Dose calibrator was used to measure the activity.

### b. Optimization of the conditions and radiosyntheses of [ $^{18}\text{F}$ ]11a

#### 1) Optimisation of the experimental conditions for the “Batch procedure” with [ $^{18}\text{F}$ ]11a

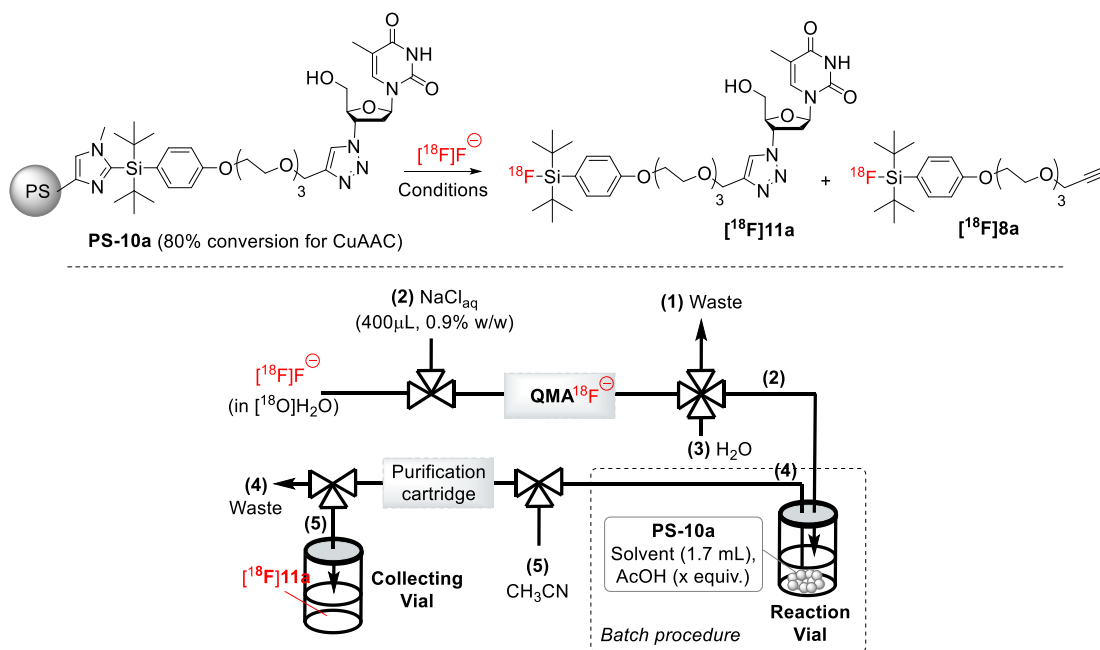

Polymer **PS-10a** (5mg or 10mg,  $\approx 0.34$  mmol/g ImidSiFA grafted,  $\approx 80\%$  conversion for the CuAAC conjugation step) was added in the reaction vial (reactor R1) with acetic acid (10 eq or 60 eq) in THF or acetonitrile (1.7 mL). Then, [ $^{18}\text{F}$ ]fluoride was automatically transferred into the synthesizer into syringe 2 and trapped by passing the solution through an anion-exchange resin cartridge (Sep-Pak QMA light, Waters). Release of [ $^{18}\text{F}$ ]fluoride from QMA cartridge was achieved by eluting an aqueous solution of NaCl (0.9% w/w, 400  $\mu\text{L}$ ) with syringe 1 to the reaction vial R1 previously loaded (only 300 $\mu\text{L}$  of this solution could be transferred effectively in R1 due to the dead volume of the system). The pinch of the reactor was closed and the resulting mixture was allowed to react at 100 $^{\circ}\text{C}$  for 15 min

to 30 min. The mixture was then cooled at 40°C and homogenized by nitrogen bubbling at low flow for 1 min (400mbar concomitant with a vacuum set at -40 mbar). Then, the reaction mixture was collected with syringe 3. The reactor was washed by adding 2 mL of a 1:1 mixture of acetonitrile and water (using syringe 4). The content was homogenized again by nitrogen bubbling at low flow for 1 min (400mbar concomitant with a vacuum set at -40 mbar) and the content of the vial was collected using syringe 3. The reactor was washed a third time with water (4mL), homogenized under N<sub>2</sub> bubbling for 1 min as previously described and collected using syringe 3. The full content of syringe 3 (containing 66% of water) was passed through a C18 Sep-Pak cartridge at 3mL/min until emptiness. Then, the cartridge was washed with additional water (4mL) at 3mL/min using syringe 4. Finally, the product was eluted at 1mL/min from the C18 Sep-Pak cartridge using acetonitrile (4mL, from syringe 4) to the collecting vial (valve 14) placed outside of the hotcell®. The radiochemical yield (RCY) was calculated from the decay-corrected activity inside the collecting vial divided by activity in the reaction vial R1 before the fluorination (at the time where fluoride-18 was fully eluted from the QMA to R1) and multiplied by the radiochemical purity (RCP). The purity of the fluorinated compound [<sup>18</sup>F]**11a** was checked from a sample by analytical HPLC at a flow rate of 0.5 or 1mL/min using the following program: 70% of B (8 min) -> 75% of B (4min) -> 75% of B (20min)-> 95% of B (5min) -> 95% of B (5min)-> 70% of B (3 min) with A = water + 0,1% of trifluoroacetic acid and B = ACN + 0,1% of trifluoroacetic acid. Compound [<sup>18</sup>F]**8** (t<sub>r</sub><sup>radio</sup> ≈ 30 min or 35 min) was detected in this case along with the desired compound [<sup>18</sup>F]**11a** (t<sub>r</sub><sup>radio</sup> ≈ 10 min or 20 min).

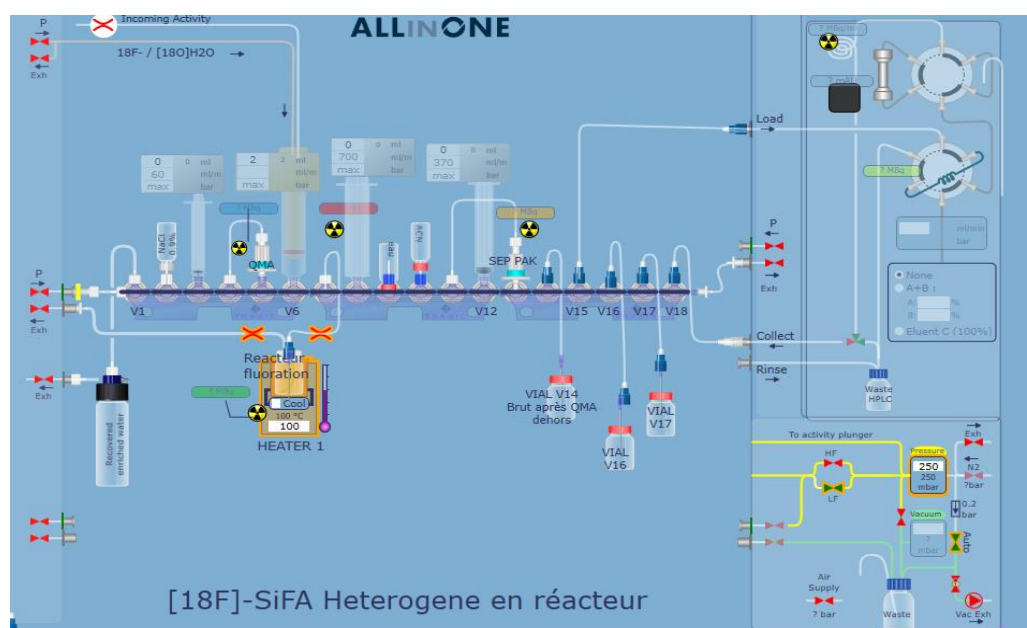

**Layout of the cassette for the “Batch procedure”**

Results of the optimization experiments are summarized in the following table:

| Experiment<br>(nb of runs) | Mass of<br><b>PS-10a</b> | Conditions                                                           | RCY of<br>[ <sup>18</sup> F] <b>11a</b> (%) | RCP of<br>[ <sup>18</sup> F] <b>11a</b> (%) | Final Activity<br>(MBq) |
|----------------------------|--------------------------|----------------------------------------------------------------------|---------------------------------------------|---------------------------------------------|-------------------------|
| 1 (n = 1)                  | 5 mg                     | THF (1.7 mL), AcOH (10 equiv), 100°C, 15 min                         | 8                                           | 81                                          | 452                     |
| 2 (n = 1)                  | 5 mg                     | CH <sub>3</sub> CN (1.7 mL), AcOH (10 equiv), 100°C, 15 min          | 16                                          | 67                                          | 1254                    |
| 3 (n = 1)                  | 5 mg                     | CH <sub>3</sub> CN (1.7 mL), AcOH ( <b>60 equiv</b> ), 100°C, 15 min | 17                                          | 65                                          | 755                     |
| 4 (n = 1)                  | <b>10 mg</b>             | CH <sub>3</sub> CN (1.7 mL), AcOH (60 equiv), 100°C, 15 min          | 14                                          | 71                                          | 880                     |
| 5 (n = 1)                  | 5 mg                     | CH <sub>3</sub> CN (1.7 mL), AcOH (60 equiv), 100°C, <b>30 min</b>   | 19                                          | 76                                          | 940                     |



Experiment 1 (PS-10a (5 mg), THF (1.7 mL), AcOH (10 equiv), 100°C, 15 min)

|            |                                                          |           |
|------------|----------------------------------------------------------|-----------|
|            | Analytical code                                          | YVX1.258  |
|            | Activity fixed on QMA                                    | 7.75 GBq  |
| t = 0 min  | Activity eluted in R1                                    | 7.60 GBq  |
| t = 17 min | Activity in R1 (end of fluorination)                     | 6.32 GBq  |
| t = 60 min | Activity in the collecting vial                          | 452 MBq   |
|            | t <sub>R</sub> <sup>radio</sup> of [ <sup>18</sup> F]11a | 20.55 min |
|            | Radiochemical purity of [ <sup>18</sup> F]11a            | 81 %      |
|            | t <sub>R</sub> <sup>radio</sup> of [ <sup>18</sup> F]8   | 35.52 min |
|            | Percentage of [ <sup>18</sup> F]8                        | 8 %       |
|            | Activity Yield                                           | 5 %       |
|            | RCY (decay corrected)                                    | 8 %       |

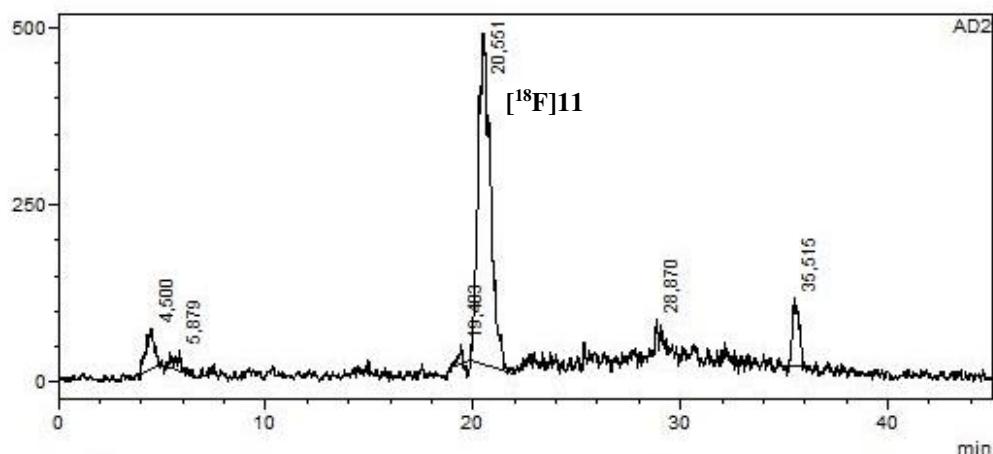

<Peak Table>

| Peak# | Ret. Time | Area     | Height | Conc.  | Unit | Mark | Name                |
|-------|-----------|----------|--------|--------|------|------|---------------------|
| 1     | 4,500     | 1579997  | 55322  | 6,598  |      | M    |                     |
| 2     | 5,879     | 730030   | 28646  | 3,049  |      | M    |                     |
| 3     | 19,403    | 92754    | 28430  | 0,387  |      | M    |                     |
| 4     | 20,551    | 19447564 | 466484 | 81,211 |      | M    |                     |
| 5     | 28,870    | 134283   | 19156  | 0,561  |      | M    |                     |
| 6     | 35,515    | 1962270  | 97150  | 8,194  |      | M    | [ <sup>18</sup> F]8 |
| Total |           | 23946899 | 695190 |        |      |      |                     |

Analytic Radio HPLC chromatogram of Experiment 1

Experiment 2 (PS-10a (5 mg), CH<sub>3</sub>CN (1.7 mL), AcOH (10 equiv), 100°C, 15 min)

|                                       |                                                          |           |
|---------------------------------------|----------------------------------------------------------|-----------|
| t = 0 min<br>t = 16 min<br>t = 63 min | Analytical code                                          | YVX1.256  |
|                                       | Activity fixed on QMA                                    | 11.56 GBq |
|                                       | Activity eluted in R1                                    | 10.15 GBq |
|                                       | Activity in R1 (end of fluorination)                     | 9.4 GBq   |
|                                       | Activity in the collecting vial                          | 1.254 GBq |
|                                       | t <sub>R</sub> <sup>radio</sup> of [ <sup>18</sup> F]11a | 10.22 min |
|                                       | Radiochemical purity of [ <sup>18</sup> F]11a            | 67 %      |
|                                       | t <sub>R</sub> <sup>radio</sup> of [ <sup>18</sup> F]8   | 31.78 min |
|                                       | Percentage of [ <sup>18</sup> F]8                        | 22 %      |
|                                       | Activity Yield                                           | 11 %      |
|                                       | RCY (decay corrected)                                    | 16 %      |

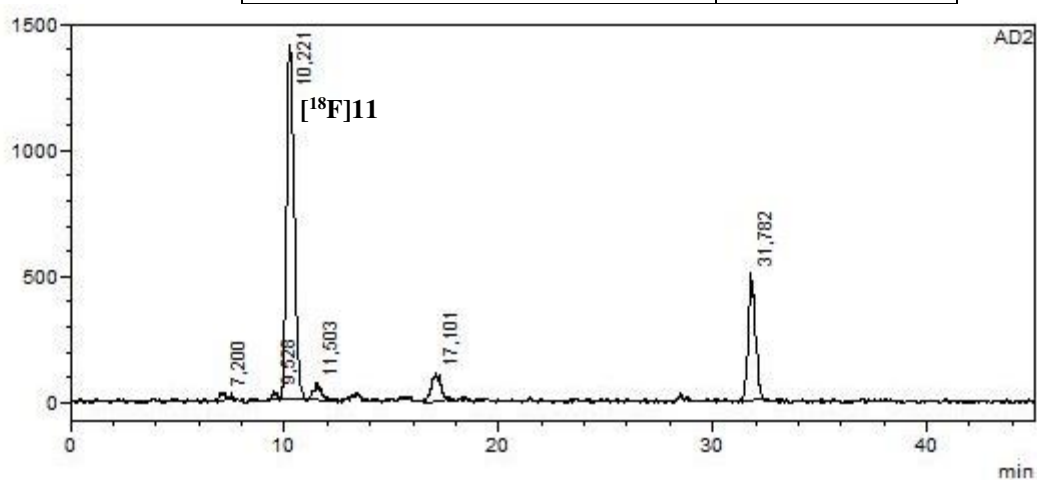

<Peak Table>

| Peak# | Ret. Time | Area     | Height  | Conc.  | Unit | Mark | Name                |
|-------|-----------|----------|---------|--------|------|------|---------------------|
| 1     | 7,200     | 569626   | 27372   | 1,102  |      | M    |                     |
| 2     | 9,528     | 457666   | 33407   | 0,885  |      | M    |                     |
| 3     | 10,221    | 34594062 | 1402375 | 66,921 |      | M    |                     |
| 4     | 11,503    | 1344998  | 63511   | 2,602  |      | M    | [ <sup>18</sup> F]8 |
| 5     | 17,101    | 3257368  | 113688  | 6,301  |      | M    |                     |
| 6     | 31,782    | 11470336 | 504477  | 22,189 |      | M    |                     |
| Total |           | 51694055 | 2144830 |        |      |      |                     |

Analytic Radio HPLC chromatogram of Experiment 2



Experiment 3 (PS-10a (5 mg), CH<sub>3</sub>CN (1.7 mL), AcOH (60 equiv), 100°C, 15 min)

|            |                                                          |           |
|------------|----------------------------------------------------------|-----------|
|            | Analytical code                                          | YVX1.250  |
|            | Activity fixed on QMA                                    | 9.8 GBq   |
| t = 0 min  | Activity eluted in R1                                    | 7.0 GBq   |
| t = 19 min | Activity in R1 (end of fluorination)                     | 6.2 GBq   |
| t = 72 min | Activity in the collecting vial                          | 755 MBq   |
|            | t <sub>R</sub> <sup>radio</sup> of [ <sup>18</sup> F]11a | 10.11 min |
|            | Radiochemical purity of [ <sup>18</sup> F]11a            | 65%       |
|            | t <sub>R</sub> <sup>radio</sup> of [ <sup>18</sup> F]8   | 30.93 min |
|            | Percentage of [ <sup>18</sup> F]8                        | 24%       |
|            | Activity Yield                                           | 11%       |
|            | RCY (decay corrected)                                    | 17%       |

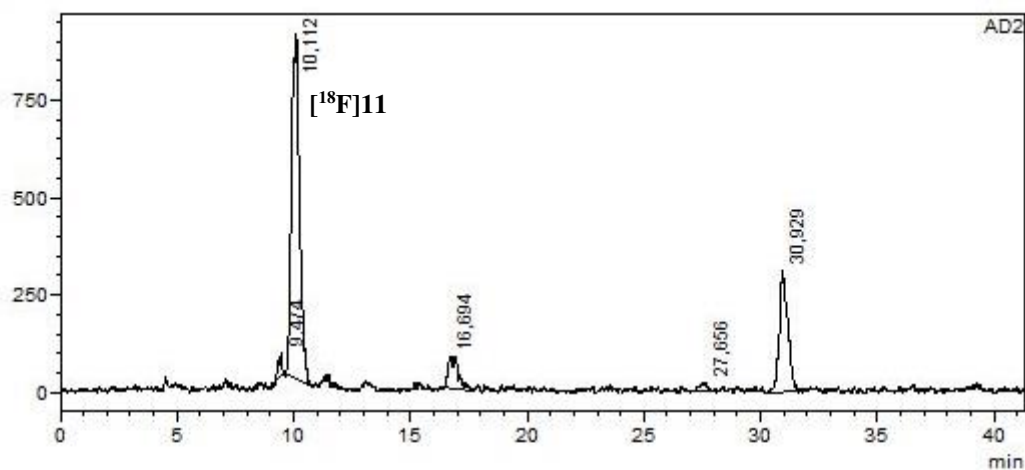

<Peak Table>

| Peak# | Ret. Time | Area     | Height  | Conc.  | Unit | Mark | Name                |
|-------|-----------|----------|---------|--------|------|------|---------------------|
| 1     | 9.474     | 523828   | 57651   | 1,627  |      | M    |                     |
| 2     | 10.112    | 21010062 | 880894  | 65,268 |      | M    |                     |
| 3     | 16.694    | 2425703  | 78215   | 7,535  |      | M    |                     |
| 4     | 27.656    | 432498   | 21712   | 1,344  |      | M    |                     |
| 5     | 30.929    | 7798383  | 310902  | 24,226 |      | M    | [ <sup>18</sup> F]8 |
| Total |           | 32190474 | 1349374 |        |      |      |                     |

Analytic Radio HPLC chromatogram of Experiment 3

Experiment 4 (PS-10a (10 mg), CH<sub>3</sub>CN (1.7 mL), AcOH (60 equiv), 100°C, 15 min)

|                                                                  |                                                          |           |
|------------------------------------------------------------------|----------------------------------------------------------|-----------|
| <div>t = 0 min</div> <div>t = 18 min</div> <div>t = 61 min</div> | Analytical code                                          | YVX1.255  |
|                                                                  | Activity fixed on QMA                                    | 11.6 GBq  |
|                                                                  | Activity eluted in R1                                    | 10.07 GBq |
|                                                                  | Activity in R1 (end of fluorination)                     | 8.9 GBq   |
|                                                                  | Activity in the collecting vial                          | 1.473 GBq |
|                                                                  | t <sub>R</sub> <sup>radio</sup> of [ <sup>18</sup> F]11a | 10.16 min |
|                                                                  | Radiochemical purity of [ <sup>18</sup> F]11a            | 71 %      |
|                                                                  | t <sub>R</sub> <sup>radio</sup> of [ <sup>18</sup> F]8   | 31.46 min |
|                                                                  | Percentage of [ <sup>18</sup> F]8                        | 13 %      |
|                                                                  | Activity Yield                                           | 12 %      |
|                                                                  | RCY (decay corrected)                                    | 17 %      |

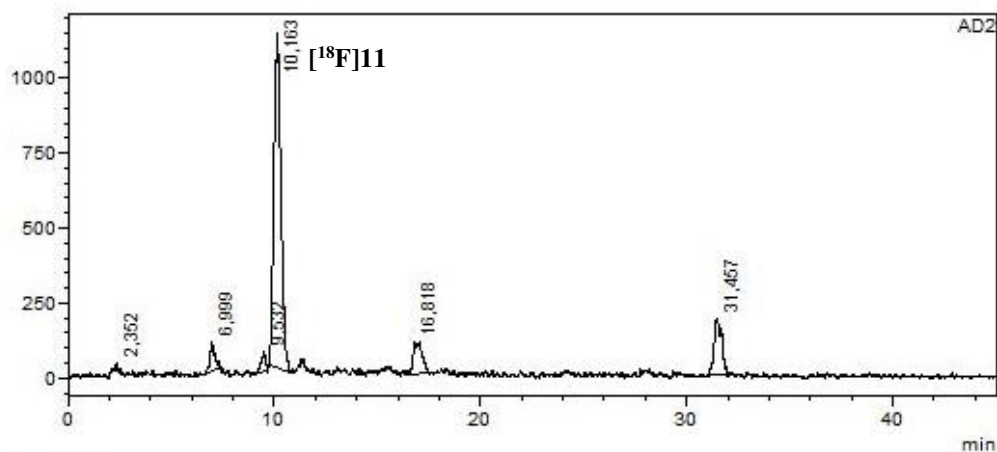

<Peak Table>

| Peak# | Ret. Time | Area     | Height  | Conc.  | Unit | Mark | Name                |
|-------|-----------|----------|---------|--------|------|------|---------------------|
| 1     | 2,352     | 280397   | 26818   | 0,756  |      | M    |                     |
| 2     | 6,999     | 1596300  | 94808   | 4,303  |      | M    |                     |
| 3     | 9,532     | 898161   | 62193   | 2,421  |      | M    |                     |
| 4     | 10,163    | 26225569 | 1112539 | 70,691 |      | M    |                     |
| 5     | 16,818    | 3254540  | 111236  | 8,773  |      | M    | [ <sup>18</sup> F]8 |
| 6     | 31,457    | 4844058  | 188883  | 13,057 |      | M    |                     |
| Total |           | 37099026 | 1596476 |        |      |      |                     |

Analytic Radio HPLC chromatogram of experiment 4

Experiment 5 (PS-10a (5 mg), CH<sub>3</sub>CN (1.7 mL), AcOH (60 equiv), 100°C, 30 min)

|                                       |                                                          |           |
|---------------------------------------|----------------------------------------------------------|-----------|
| t = 0 min<br>t = 24 min<br>t = 66 min | Analytical code                                          | YVX1.251  |
|                                       | Activity fixed on QMA                                    | 8.8 GBq   |
|                                       | Activity eluted in R1                                    | 7.39 GBq  |
|                                       | Activity in R1 (end of fluorination)                     | 5.82 GBq  |
|                                       | Activity in the collecting vial                          | 940 MBq   |
|                                       | t <sub>R</sub> <sup>radio</sup> of [ <sup>18</sup> F]11a | 10.04 min |
|                                       | Radiochemical purity of [ <sup>18</sup> F]11a            | 76 %      |
|                                       | t <sub>R</sub> <sup>radio</sup> of [ <sup>18</sup> F]8   | 31.22 min |
|                                       | Percentage of [ <sup>18</sup> F]8                        | 11 %      |
|                                       | Activity Yield                                           | 12 %      |
|                                       | RCY (decay corrected)                                    | 19 %      |

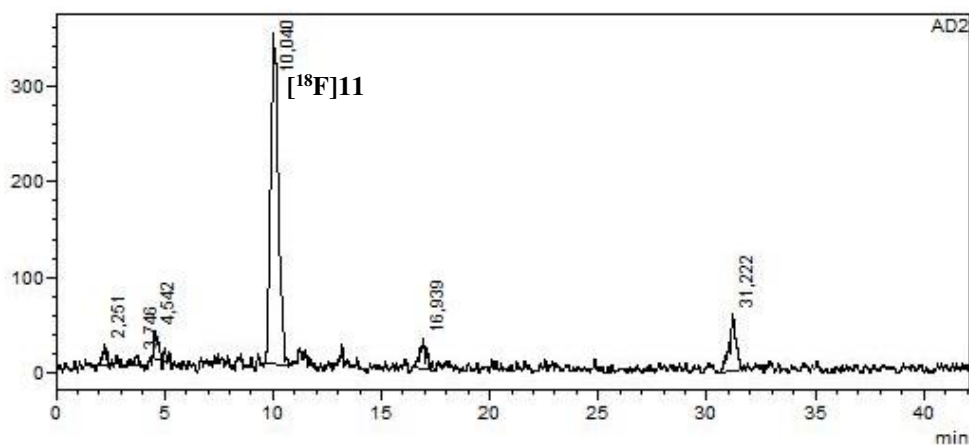

<Peak Table>

| Peak# | Ret. Time | Area     | Height | Conc.  | Unit | Mark | Name                |
|-------|-----------|----------|--------|--------|------|------|---------------------|
| 1     | 2.251     | 217943   | 20080  | 1.961  |      | M    |                     |
| 2     | 3.746     | 129655   | 10124  | 1.167  |      | M    |                     |
| 3     | 4.542     | 441331   | 28467  | 3.971  |      | M    |                     |
| 4     | 10.040    | 8423774  | 343554 | 75.792 |      | M    |                     |
| 5     | 16.939    | 630822   | 31623  | 5.676  |      | M    |                     |
| 6     | 31.222    | 1270862  | 59827  | 11.434 |      | M    | [ <sup>18</sup> F]8 |
| Total |           | 11114387 | 493675 |        |      |      |                     |

Analytic Radio HPLC chromatogram of experiment 5

## 2) Synthesis of [<sup>18</sup>F]**11a** using the “Batch procedure”

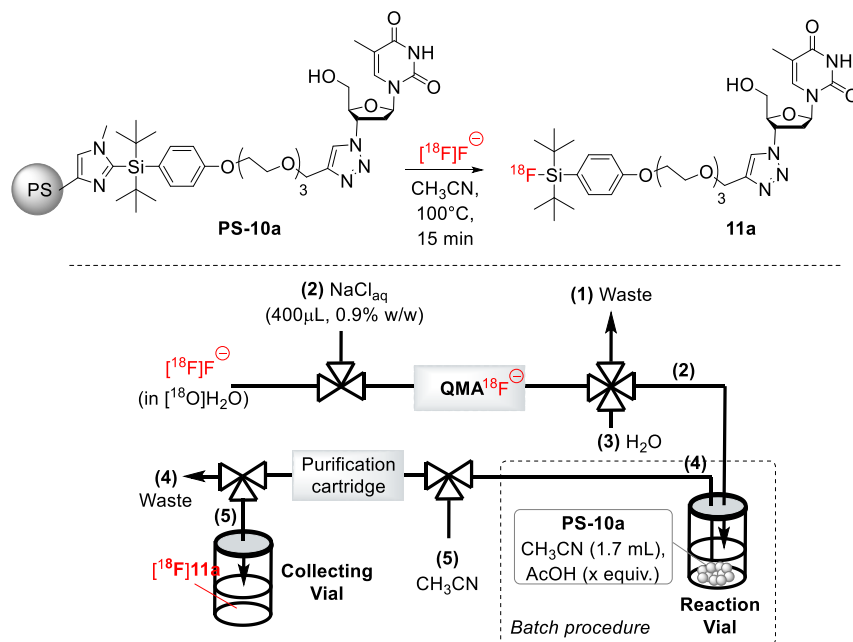

Polymer **PS-10a** (5mg, ≈0.34 mmol/g ImidSiFA grafted, 100% conversion for the CuAAC conjugation step) was added in the reaction vial (reactor R1) with acetic acid (10 eq or 60 eq) in acetonitrile (1.7 mL). Then, [<sup>18</sup>F]fluoride was automatically transferred into the synthesizer into syringe 2 and trapped by passing the solution through an anion-exchange resin cartridge (Sep-Pak QMA light, Waters). Release of [<sup>18</sup>F]fluoride from QMA cartridge was achieved by eluting an aqueous solution of NaCl (0.9% w/w, 400 μL) with syringe 1 to the reaction vial R1 previously loaded (only 300 μL of this solution could be transferred effectively in R1 due to the dead volume of the system). The pinch of the reactor was closed and the resulting mixture was allowed to react at 100°C for 15 min. The mixture was then cooled at 40°C and homogenized by nitrogen bubbling at low flow for 1 min (400mbar concomitant with a vacuum set at -40 mbar). Then, the reaction mixture was collected with syringe 3. The reactor was washed by adding 2 mL of a 1:1 mixture of acetonitrile and water (using syringe 4). The content was homogenized again by nitrogen bubbling at low flow for 1 min (400mbar concomitant with a vacuum set at -40 mbar) and the content of the vial was collected using syringe 3. The reactor was washed a third time with water (4mL), homogenized under N<sub>2</sub> bubbling for 1 min as previously described and collected using syringe 3. The full content of syringe 3 (containing 66% of water) was passed through a C18 Sep-Pak cartridge at 3mL/min until emptiness. Then, the cartridge was washed with additional water (4mL) at 3mL/min using syringe 4. Finally, the product was eluted at 1mL/min from the C18 Sep-Pak cartridge using acetonitrile (4mL, from syringe 4) to the collecting vial (valve 14) placed outside of the hotcell<sup>®</sup>. The radiochemical yield (RCY) was calculated from the decay-corrected activity inside the collecting vial divided by activity in the reaction vial R1 before the fluorination (at the time where fluoride-18 was fully eluted from the QMA to R1) and multiplied by the radiochemical purity (RCP). The purity of the fluorinated compound [<sup>18</sup>F]**11a** was checked from a sample by analytical HPLC at a flow rate of 1mL/min using the following program: 70% of B (8 min) -> 75% of B (4min) -> 75% of B (20min)-> 95% of B (5min) -> 95% of B (5min)-> 70% of B (3 min) with A = water + 0,1% of trifluoroacetic acid and B = ACN + 0,1% of trifluoroacetic acid. The desired compound [<sup>18</sup>F]**11a** was detected by radio HPLC (*t<sub>R</sub>*<sup>radio</sup> ≈ 10 min).

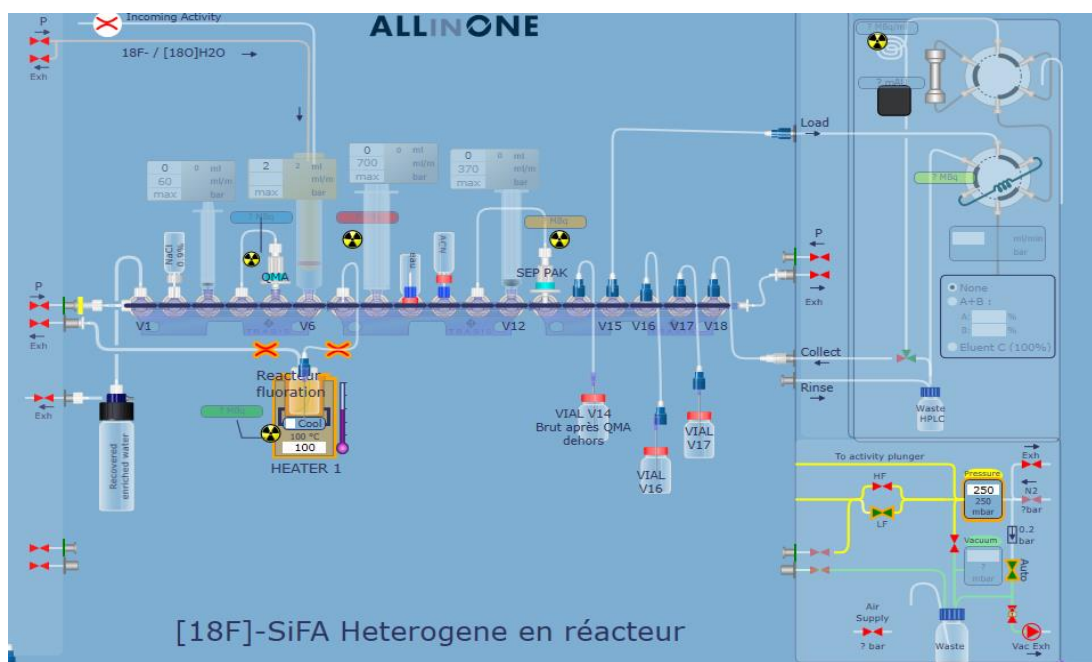

Layout of the cassette for the synthesis of  $[^{18}\text{F}]11\text{a}$  by the "Batch procedure"

Results of the experiments are summarized in the following table:

| Experiment<br>(nb of runs) | Conditions                                                                                                                | RCY of<br>$[^{18}\text{F}]11\text{a}$ (%) | RCP of<br>$[^{18}\text{F}]11\text{a}$ (%) | Final Activity<br>(MBq) |
|----------------------------|---------------------------------------------------------------------------------------------------------------------------|-------------------------------------------|-------------------------------------------|-------------------------|
| <b>6 (n = 1)</b>           | <b>PS-10a (5 mg), <math>\text{CH}_3\text{CN}</math> (1.7 mL), AcOH (60 equiv), <math>100^\circ\text{C}</math>, 15 min</b> | <b>12</b>                                 | <b>97</b>                                 | <b>780</b>              |
| 7 (n = 3)                  | PS-10a (5 mg), $\text{CH}_3\text{CN}$ (1.7 mL), AcOH (10 equiv), $100^\circ\text{C}$ , 15 min                             | $13 \pm 3^a$                              | $97 \pm 3^a$                              | -                       |
| 7-1 (n = 1)                | PS-10a (5 mg), $\text{CH}_3\text{CN}$ (1.7 mL), AcOH (10 equiv), $100^\circ\text{C}$ , 15 min                             | 15                                        | >98                                       | 1181                    |
| 7-2 (n = 1)                | PS-10a (5 mg), $\text{CH}_3\text{CN}$ (1.7 mL), AcOH (10 equiv), $100^\circ\text{C}$ , 15 min                             | 10                                        | 94                                        | 742                     |
| 7-3 (n = 1)                | PS-10a (5 mg), $\text{CH}_3\text{CN}$ (1.7 mL), AcOH (10 equiv), $100^\circ\text{C}$ , 15 min                             | 11                                        | 97                                        | 849                     |

<sup>a</sup> mean  $\pm$  standard deviation of the 3 experiments

Experiment 6 (PS-10a (5 mg), THF (1.7 mL), AcOH (60 equiv), 100°C, 15 min)

|                                                                  |                                                          |          |
|------------------------------------------------------------------|----------------------------------------------------------|----------|
| <div>t = 0 min</div> <div>t = 19 min</div> <div>t = 54 min</div> | Analytical code                                          | YVX1.262 |
|                                                                  | Activity fixed on QMA                                    | 9.29 GBq |
|                                                                  | Activity eluted in R1                                    | 8.9 GBq  |
|                                                                  | Activity in R1 (end of fluorination)                     | 7.8 GBq  |
|                                                                  | Activity in the collecting vial                          | 780 MBq  |
|                                                                  | t <sub>R</sub> <sup>radio</sup> of [ <sup>18</sup> F]11a | 9.65 min |
|                                                                  | Radiochemical purity of [ <sup>18</sup> F]11a            | 97%      |
|                                                                  | Activity Yield                                           | 9%       |
|                                                                  | RCY (decay corrected)                                    | 12%      |

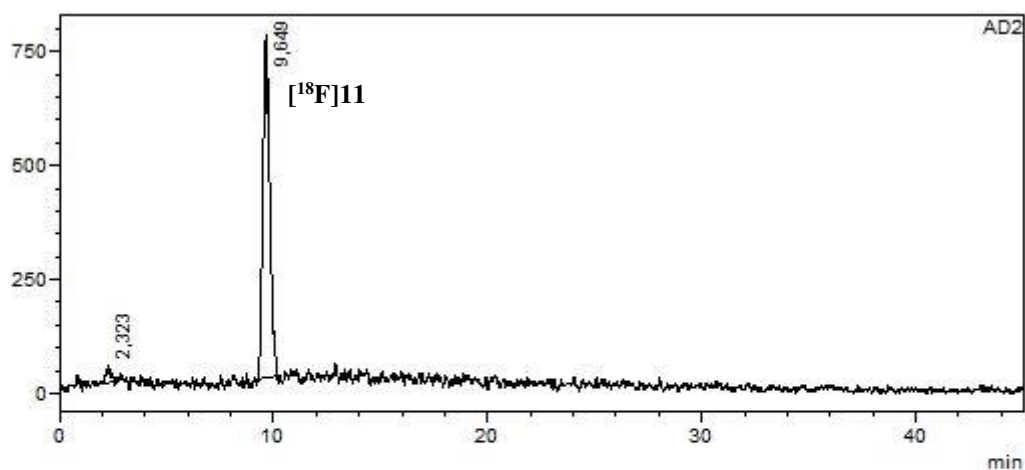

<Peak Table>

| Peak# | Ret. Time | Area     | Height | Conc.  | Unit | Mark | Name |
|-------|-----------|----------|--------|--------|------|------|------|
| 1     | 2,323     | 488299   | 35838  | 2,866  |      | M    |      |
| 2     | 9,649     | 16546526 | 753009 | 97,134 |      | M    |      |
| Total |           | 17034825 | 788847 |        |      |      |      |

Analytic Radio HPLC chromatogram of experiment 6

Experiment 7-1 (**PS-10a** (5 mg), THF (1.7 mL), AcOH (10 equiv), 100°C, 15 min)

|            |                                                                  |                 |
|------------|------------------------------------------------------------------|-----------------|
|            | <b>Analytical code</b>                                           | <b>YVX1.276</b> |
|            | Activity fixed on QMA                                            | 11.25 GBq       |
| t = 0 min  | Activity eluted in R1                                            | 10.4 GBq        |
| t = 17 min | Activity in R1 (end of fluorination)                             | 9.31 GBq        |
| t = 40 min | Activity in the collecting vial                                  | 1.181 GBq       |
|            | t <sub>R</sub> <sup>radio</sup> of [ <sup>18</sup> F] <b>11a</b> | 9.03 min        |
|            | Radiochemical purity of [ <sup>18</sup> F] <b>11a</b>            | >98%            |
|            | Activity Yield                                                   | 11%             |
|            | <b>RCY (decay corrected)</b>                                     | <b>15%</b>      |

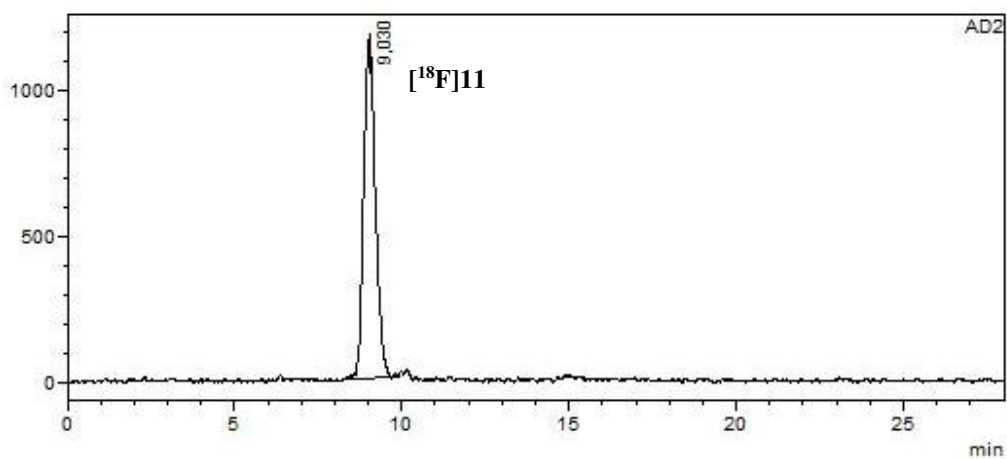

<Peak Table>

| Peak# | Ret. Time | Area     | Height  | Conc.   | Unit | Mark | Name |
|-------|-----------|----------|---------|---------|------|------|------|
| 1     | 9.030     | 28231396 | 1171137 | 100,000 |      | M    |      |
| Total |           | 28231396 | 1171137 |         |      |      |      |

Analytic Radio HPLC chromatogram of experiment 7-1

Experiment 7-2 (**PS-10a** (5 mg), THF (1.7 mL), AcOH (10 equiv), 100°C, 15 min)

|                                                                  |                                                                  |           |
|------------------------------------------------------------------|------------------------------------------------------------------|-----------|
| <div>t = 0 min</div> <div>t = 17 min</div> <div>t = 40 min</div> | Analytical code                                                  | YVX1.277  |
|                                                                  | Activity fixed on QMA                                            | 10.25 GBq |
|                                                                  | Activity eluted in R1                                            | 9.6 GBq   |
|                                                                  | Activity in R1 (end of fluorination)                             | 8.66 GBq  |
|                                                                  | Activity in the collecting vial                                  | 742 MBq   |
|                                                                  | t <sub>R</sub> <sup>radio</sup> of [ <sup>18</sup> F] <b>11a</b> | 9.06 min  |
|                                                                  | Radiochemical purity of [ <sup>18</sup> F] <b>11a</b>            | 94%       |
|                                                                  | Activity Yield                                                   | 8%        |
|                                                                  | RCY (decay corrected)                                            | 10%       |

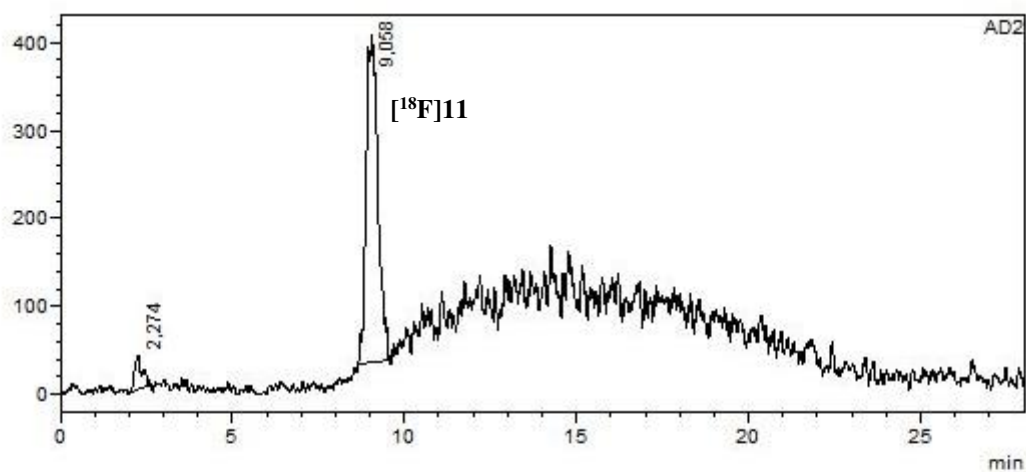

<Peak Table>

| AD2   |           |         |        |        |      |      |      |
|-------|-----------|---------|--------|--------|------|------|------|
| Peak# | Ret. Time | Area    | Height | Conc.  | Unit | Mark | Name |
| 1     | 2,274     | 556692  | 38132  | 5,969  |      | M    |      |
| 2     | 9,058     | 8769942 | 370564 | 94,031 |      | M    |      |
| Total |           | 9326635 | 408696 |        |      |      |      |

Analytic Radio HPLC chromatogram of experiment 7-2



Experiment 7-3 (**PS-10a** (5 mg), THF (1.7 mL), AcOH (10 equiv), 100°C, 15 min)

|  |                                                       |                                      |
|--|-------------------------------------------------------|--------------------------------------|
|  | <b>Analytical code</b>                                | <b>YVX1.281</b>                      |
|  | Activity fixed on QMA                                 | 10.39 GBq                            |
|  | t = 0 min                                             | Activity eluted in R1                |
|  | t = 18 min                                            | Activity in R1 (end of fluorination) |
|  | t = 41 min                                            | Activity in the collecting vial      |
|  | t <sub>R</sub> radio of [ <sup>18</sup> F] <b>11a</b> | 8.88 min                             |
|  | Radiochemical purity of [ <sup>18</sup> F] <b>11a</b> | 97%                                  |
|  | Activity Yield                                        | 9%                                   |
|  | <b>RCY (decay corrected)</b>                          | <b>11%</b>                           |

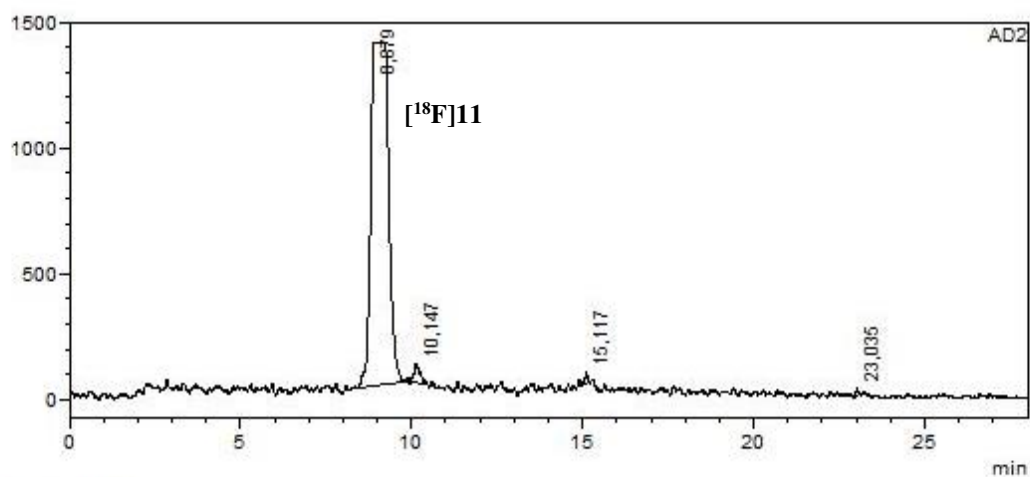

<Peak Table>

| Peak# | Ret. Time | Area     | Height  | Conc.  | Unit | Mark | Name |
|-------|-----------|----------|---------|--------|------|------|------|
| 1     | 8.879     | 48558245 | 1362393 | 97,433 |      | M    |      |
| 2     | 10.147    | 830266   | 74103   | 1,666  |      | M    |      |
| 3     | 15.117    | 339421   | 48688   | 0,681  |      | M    |      |
| 4     | 23.035    | 109841   | 28972   | 0,220  |      | M    |      |
| Total |           | 49837772 | 1514155 |        |      |      |      |

Analytic Radio HPLC chromatogram of experiment 7-3

### 3) Indirect synthesis of [ $^{18}\text{F}$ ]11a

For comparison, an indirect synthesis was performed by radiofluorination of PS-ImidSiFA-Alkyne **PS-7** followed by CuAAC click reaction of the resulting [ $^{18}\text{F}$ ]**8** with AZT.

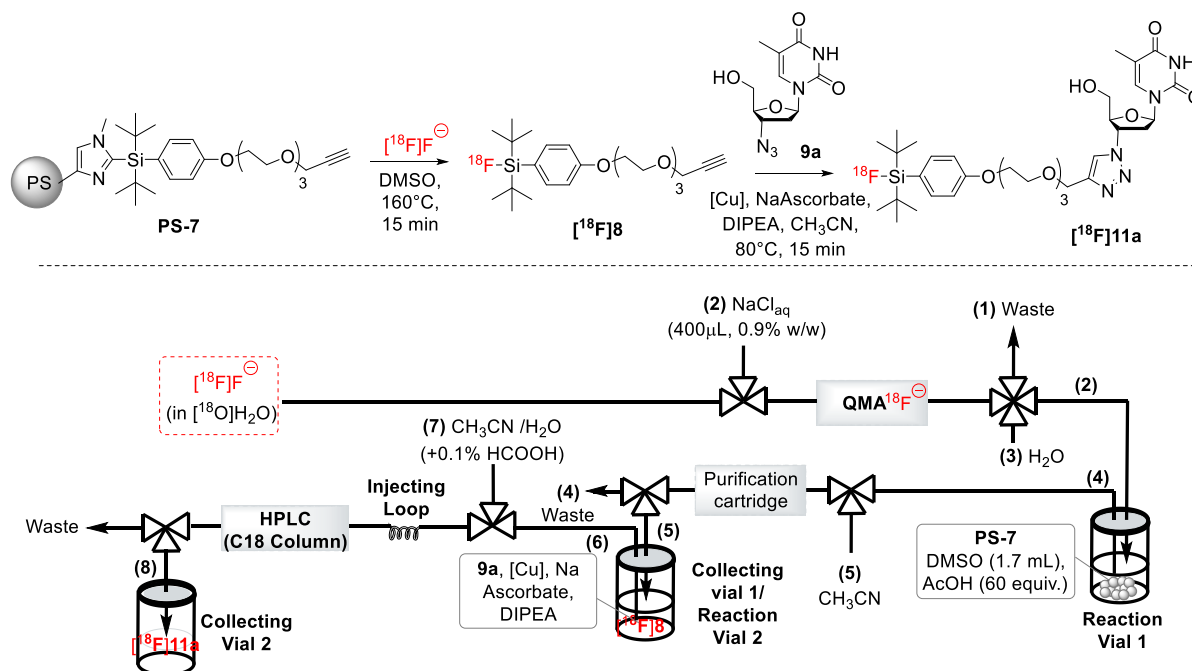

Polymer **PS-7** (5mg,  $\approx 0.36$  mmol/g ImidSiFA grafted) was added in the reaction vial 1 (reactor R1) with acetic acid (60 eq) in DMSO (1.7 mL). Then, [ $^{18}\text{F}$ ]fluoride was automatically transferred into the synthesizer into syringe 2 and trapped by passing the solution through an anion-exchange resin cartridge (Sep-Pak QMA light, Waters). Release of [ $^{18}\text{F}$ ]fluoride from QMA cartridge was achieved by eluting an aqueous solution of NaCl (0.9% w/w, 400  $\mu\text{L}$ ) with syringe 1 to the reaction vial R1 previously loaded (only 300  $\mu\text{L}$  of this solution could be transferred effectively in R1 due to the dead volume of the system). The pinch of the reactor was closed and the resulting mixture was allowed to react at 100°C for 15 min to 30 min. The mixture was then cooled at 40°C and homogenized by nitrogen bubbling at low flow for 1 min (400mbar concomitant with a vacuum set at -40 mbar). Then, the reaction mixture was collected with syringe 3. The reactor was washed by adding 2 mL of a 1:1 mixture of acetonitrile and water (using syringe 4). The content was homogenized again by nitrogen bubbling at low flow for 1 min (400mbar concomitant with a vacuum set at -40 mbar) and the content of the vial was collected using syringe 3. The reactor was washed a third time with water (4mL), homogenized under  $\text{N}_2$  bubbling for 1 min as previously described and collected using syringe 3. The full content of syringe 3 (containing 66% of water) was passed through a C18 Sep-Pak cartridge at 3mL/min until emptiness. Then, the cartridge was washed with additional water (4mL) at 3mL/min using syringe 4. Finally, the product was eluted at 1mL/min from the C18 Sep-Pak cartridge using acetonitrile (4mL, from syringe 4) to the collecting vial 1 (C1, valve 16) placed outside of the hotcell<sup>®</sup> to measure the yield after the first step of radiolabelling.

The second step was the CuAAC Click reaction with AZT in reaction vial 2 (R2) loaded before the beginning of the synthesis with AZT (zidovudine) (2 mg, 7.5  $\mu\text{mol}$ ), sodium ascorbate (2 mg, 10  $\mu\text{mol}$ ), [CuCl(TBTA)]Cl (1 mg, 0.35  $\mu\text{mol}$ ) and diisopropylethylamine (7  $\mu\text{L}$ , 5.2 mg, 40  $\mu\text{mol}$ ). [ $^{18}\text{F}$ ]Fluorinated compound [ $^{18}\text{F}$ ]**8** in acetonitrile (4 mL) was added to reactor 2 (R2) by using vacuum line from V16 in collecting vial 1 at -500 mbar. The reaction mixture was heated at 80°C for 15 min under low flow nitrogen bubbling (100mbar with a vacuum set at -50 mbar) to stir the reaction. The content of R2 was collected by using syringe 4. The reactor was washed with acetonitrile (4mL), collected with syringe 4 and transferred to the injection loop at 2 mL/min. The purification of

the final compound [ $^{18}\text{F}$ ]**11a** was performed by the built-in HPLC module using a reverse phase semi-preparative column (Luna C18 (5  $\mu\text{m}$ , 100  $\text{\AA}$ , 250x10mm) using a mixture of acetonitrile/water (65/35) buffered with 0.1% of formic acid as eluent (isocratic). Two fractions were collected in V17 in two different collecting vial C2 and C3. The first fraction in C2 corresponded to the desired [ $^{18}\text{F}$ ]-SiFA-AZT [ $^{18}\text{F}$ ]**11a** ( $t_{\text{R}}$  = 12 min) and the second fraction in C3 corresponded to the unreacted [ $^{18}\text{F}$ ]-SiFA-alkyne [ $^{18}\text{F}$ ]**8** ( $t_{\text{R}}$  = 19 min). Analytical HPLC of each fraction were performed using at 1mL/min with the following program: 80% of B (13 min) -> 95% of B (2min) -> 95% of B (3min) -> 80% of B (2 min). (A = water + 0,1% of trifluoroacetic acid and B = acetonitrile + 0,1% of trifluoroacetic acid,  $t_{\text{R}}$  radio [ $^{18}\text{F}$ ]**11a** = 6.48 min,  $t_{\text{R}}$  radio [ $^{18}\text{F}$ ]**8** = 17.20 min).

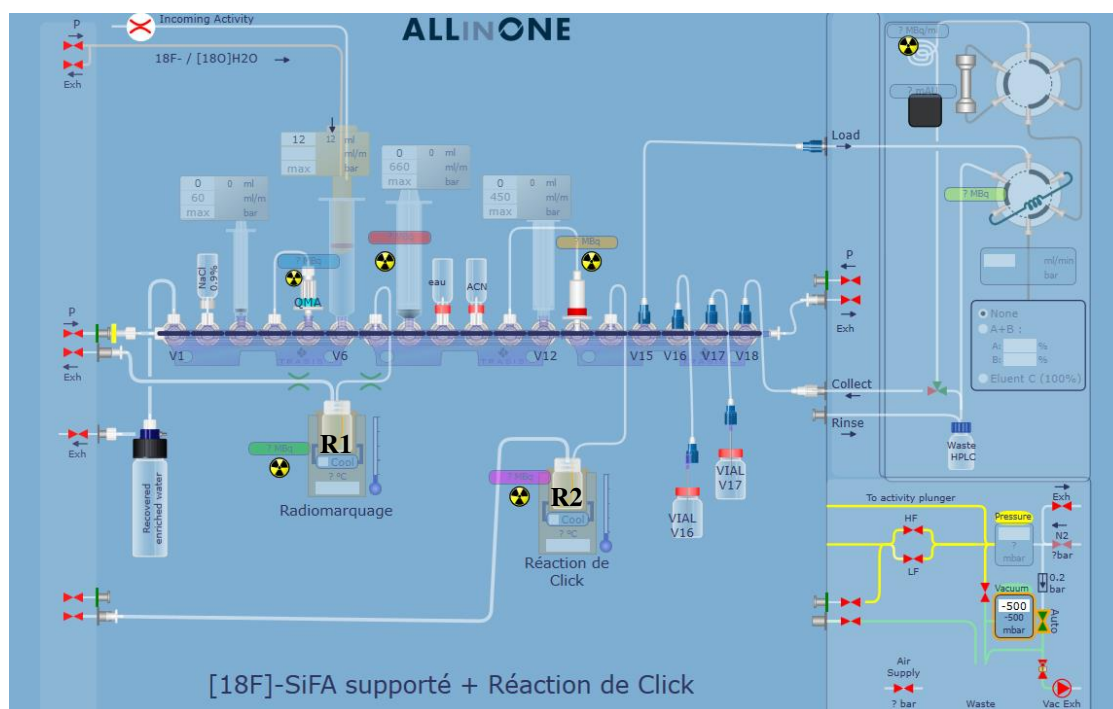

Layout of the cassette for the synthesis of [ $^{18}\text{F}$ ]**11a** by the “Indirect procedure”

|            | Experiment                                          | YVX1.491  |                |
|------------|-----------------------------------------------------|-----------|----------------|
|            | Activity fixed on QMA                               | 10.28 GBq |                |
| t = 0 min  | Activity eluted in R1                               | 9.18 GBq  | Radiolabelling |
| t = 21 min | Activity in R1 (end of fluorination)                | 7.8 GBq   |                |
| t = 44 min | Activity in collecting vial C1                      | 1037 MBq  |                |
|            | $t_{\text{R}}$ radio [ $^{18}\text{F}$ ] <b>8</b>   | 17.23 min |                |
|            | Radiochemical purity                                | 88%       |                |
|            | Activity yield for step 1                           | 11%       |                |
|            | Radiochemical yield for step 1                      | 15 %      |                |
| t = 88 min | Activity collected in C2 ( $t_{\text{R}}$ = 12 min) | 126 MBq   | Click reaction |
|            | $t_{\text{R}}$ radio [ $^{18}\text{F}$ ] <b>11a</b> | 6.48 min  |                |
|            | Radiochemical purity                                | >98%      |                |
|            | Activity yield for step 1&2                         | 1%        |                |
|            | <b>Radiochemical yield for step 1&amp;2</b>         | <b>2%</b> |                |
| t = 99 min | Activity collected in C3 ( $t_{\text{R}}$ = 19 min) | 232 MBq   |                |
|            | $t_{\text{R}}$ radio [ $^{18}\text{F}$ ] <b>8</b>   | 17.23 min |                |
|            | Radiochemical purity                                | >98%      |                |

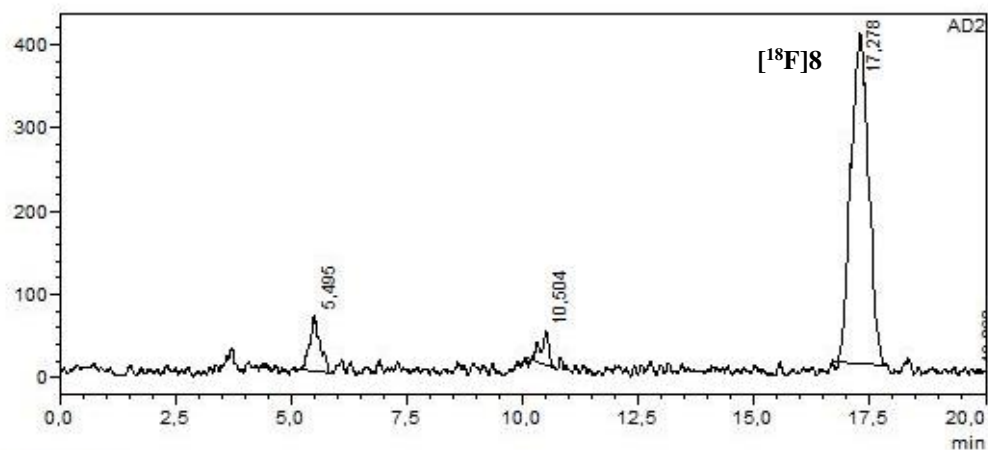

<Peak Table>

| Peak# | Ret. Time | Area     | Height | Conc.  | Unit | Mark | Name |
|-------|-----------|----------|--------|--------|------|------|------|
| 1     | 5.495     | 1002607  | 65980  | 8,407  |      | M    |      |
| 2     | 10.504    | 413114   | 39510  | 3,464  |      | M    |      |
| 3     | 17.278    | 10491957 | 396770 | 87,976 |      | M    |      |
| 4     | 19.862    | 18242    | 5566   | 0,153  |      |      |      |
| Total |           | 11925919 | 507826 |        |      |      |      |

Analytic Radio HPLC chromatogram of [ $^{18}\text{F}$ ]8 after the first reaction

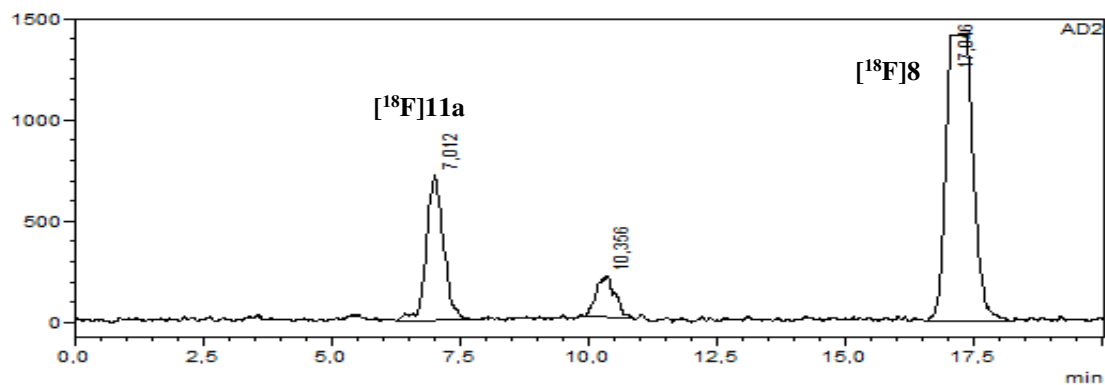

| Peak Start | Peak End | Ret. Time | Height  | Area     | Area%   |
|------------|----------|-----------|---------|----------|---------|
| 6.292      | 7.783    | 7,012     | 715232  | 16436064 | 22,577  |
| 9.833      | 10,875   | 10,356    | 207691  | 5220707  | 7,171   |
| 16.542     | 18,267   | 17,046    | 1405411 | 51144512 | 70,252  |
|            |          |           | 2328334 | 72801283 | 100,000 |

Analytic Radio HPLC chromatogram of the crude of the Click reaction

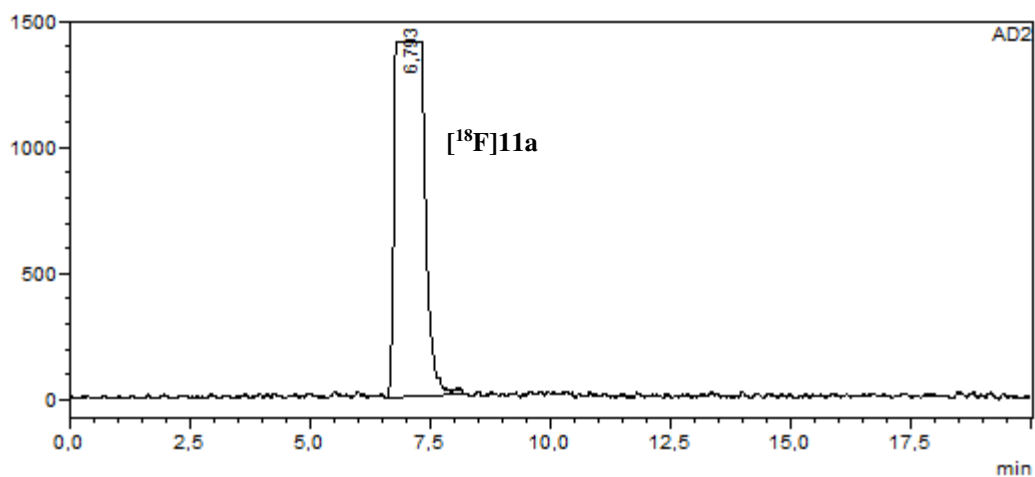

**<Peak Table>**

| Peak# | Ret. Time | Area     | Height  | Conc.   | Unit | Mark | Name |
|-------|-----------|----------|---------|---------|------|------|------|
| 1     | 6.793     | 60048603 | 1404690 | 100,000 |      | M    |      |

Analytic Radio HPLC chromatogram of [ $^{18}\text{F}$ ]11a after HPLC purification  
( $t_{\text{R}}$  PrepHPLC = 12 min)

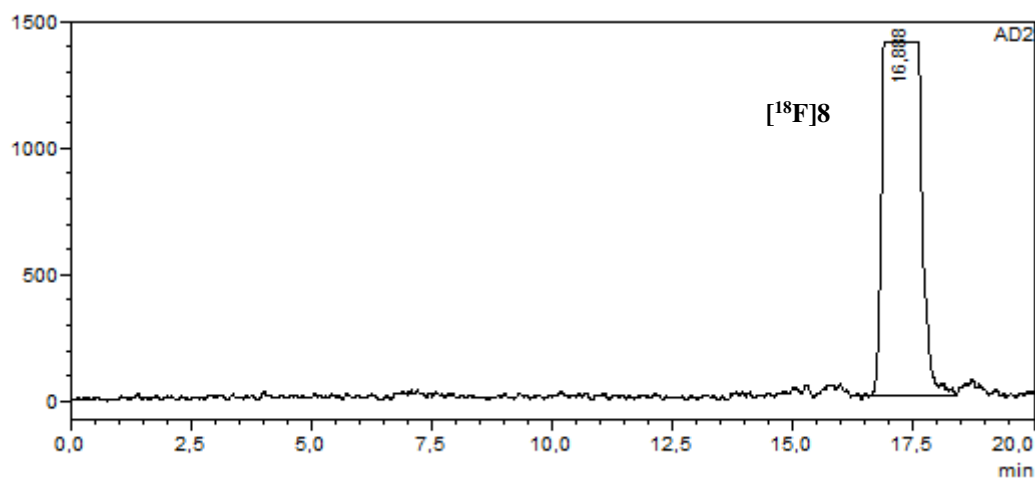

**<Peak Table>**

| Peak# | Ret. Time | Area     | Height  | Conc.   | Unit | Mark | Name |
|-------|-----------|----------|---------|---------|------|------|------|
| 1     | 16.888    | 76079180 | 1393989 | 100,000 |      | M    |      |

Analytic Radio HPLC chromatogram of [ $^{18}\text{F}$ ]8 after HPLC purification  
( $t_{\text{R}}$  PrepHPLC = 19 min)

#### 4) Synthesis of [<sup>18</sup>F]11a with the “Flow procedure”

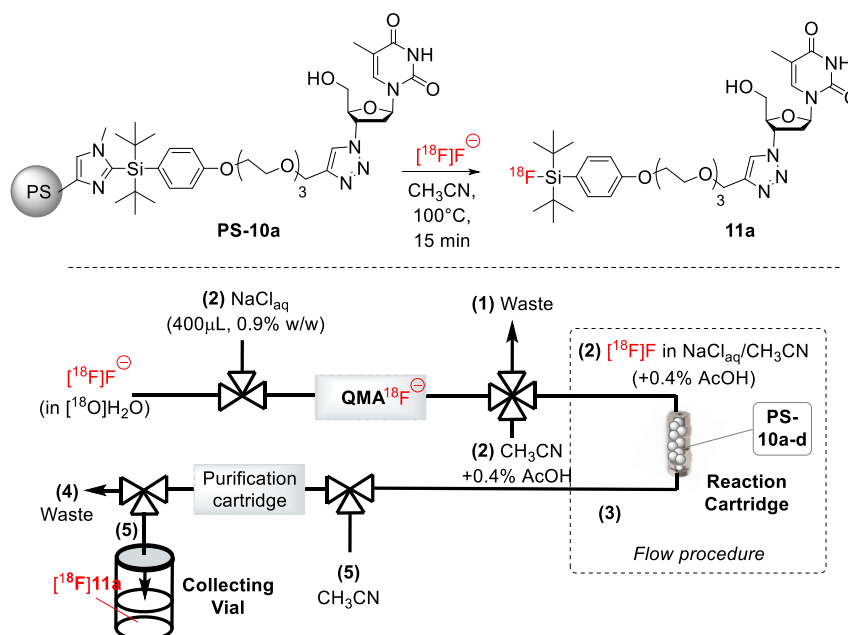

Polymer **PS-10a** (5mg, ≈0.34 mmol/g ImidSiFA grafted, 100% conversion for the CuAAC conjugation step) was mixed with the commercial polymer Oasis WAX (100 mg, 60 μm, 80 Å) and the mixture was packed inside a “metallic cartridge” (Empty stainless steel HPLC column, 20x4mm). A mixture of acetic acid (0.4 mL) in acetonitrile (100 mL) was used to impregnate the cartridge on valve V9 at 1mL/min. The impregnation was performed before closing the hotcell® to check the absence of leaks from the cartridge. The cartridge was pre-heated in advance at 100°C with the cartridge heater. Then, [<sup>18</sup>F]fluoride was automatically transferred into the synthesizer into syringe 2 and trapped by passing the solution through an anion-exchange resin cartridge (Sep-Pak QMA light, Waters). Release of [<sup>18</sup>F]fluoride from QMA cartridge was achieved by eluting an aqueous solution of NaCl (0.9% w/w, 400 μL) with syringe 1 to syringe 3, and a mixture at 0.4% of acetic acid in acetonitrile (3.7-4.1 mL) was consecutively retrieved from valve 7 into syringe 3. Firstly, 1.3 mL of the overall content of syringe 3 mixture was pushed into the inlet of the cartridge at 1mL/min (as a dead volume of 1.3 mL was calculated between the cartridge and the syringe). Then, the reaction was performed in flow by transferring the content of syringe 3 at 0.3 mL/min over 15-16 min to syringe 4 through the reaction cartridge until emptiness. After this transfer, the cartridge was washed with acetonitrile containing 0.4% of acetic acid (1mL) from syringe 3 to syringe 4 at 3 mL/min. Water (11 mL) was taken from vial 14 to syringe 4. The content of syringe 4 (containing 68% of water) was eluted on the C18 cartridge at 3mL/min to vial 16. Then, the cartridge was washed with water (4mL) at 3mL/min using syringe 4 collected in vial 16 and finally, product [<sup>18</sup>F]11a was eluted at 1mL/min from the purification cartridge by using acetonitrile (4mL) from syringe 4 to a collecting vial 17 placed outside of the hotcell®. The purity of the fluorinated compound [<sup>18</sup>F]11a was checked from a sample by analytical HPLC at a flow rate of 1mL/min using the following program: 70% of B (11 min) -> 75% of B (4min) ->75% of B (15min)-> 95% of B (5 min) -> 95% of B (5 min) -> 70% of B (1 min) with A = water + 0,1% of trifluoroacetic acid and B = ACN + 0,1% of trifluoroacetic acid. The desired compound [<sup>18</sup>F]11a was detected by radio HPLC (t<sub>R</sub><sup>radio</sup> : 9.09min).

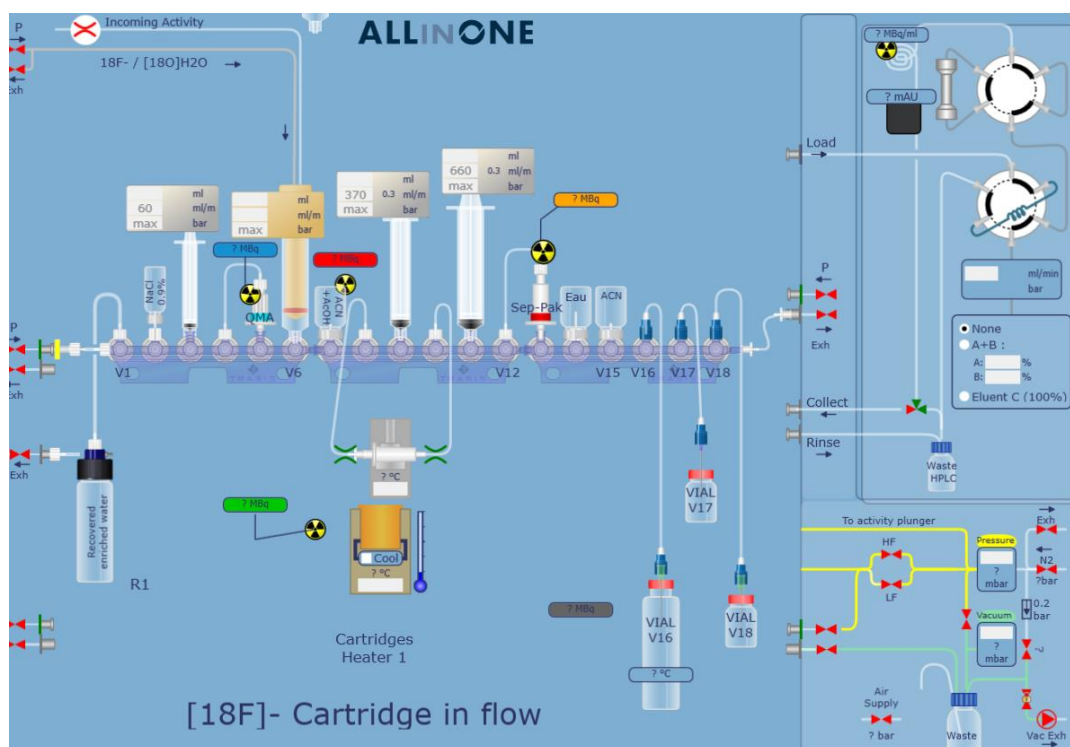

Layout of the cassette for the synthesis of [ $^{18}\text{F}$ ]11a by the “Flow procedure”

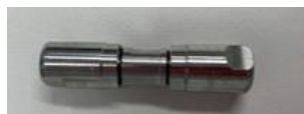

*Metallic cartridge used for the synthesis in cartridge*

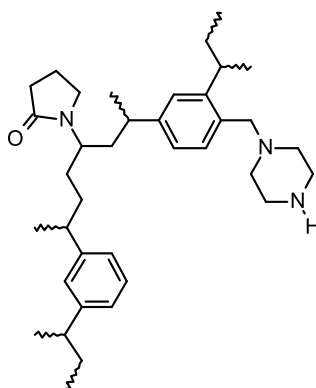

Representative structure of the Oasis WAX Resin mixed with PS-10a in the reaction cartridge

| Experiment<br>(nb of runs) | Conditions (Flow procedure)                                                                      | RCY of<br>[ $^{18}\text{F}$ ]11a (%) | RCP of<br>[ $^{18}\text{F}$ ]11a (%) | Final Activity<br>(MBq) |
|----------------------------|--------------------------------------------------------------------------------------------------|--------------------------------------|--------------------------------------|-------------------------|
| <b>8</b> ( $n = 2$ )       | <b>PS-10a (5 mg), <math>\text{CH}_3\text{CN}</math> (1.7 mL), AcOH (60 equiv), 100°C, 16 min</b> | <b><math>7 \pm 1^a</math></b>        | <b><math>87 \pm 3^a</math></b>       | <b>-</b>                |
| 8-1 ( $n = 1$ )            | <b>PS-10a (5 mg), <math>\text{CH}_3\text{CN}</math> (1.7 mL), AcOH (10 equiv), 100°C, 16 min</b> | 6                                    | 85                                   | 292                     |
| 8-2 ( $n = 1$ )            | <b>PS-10a (5 mg), <math>\text{CH}_3\text{CN}</math> (1.7 mL), AcOH (10 equiv), 100°C, 16 min</b> | 7                                    | 89                                   | 504                     |

<sup>a</sup> mean  $\pm$  standard deviation of the 2 experiments



Experiment 8-1 (**PS-10a** (5 mg), THF (1.7 mL), AcOH (60 equiv), 100°C, 16 min, flow procedure)

|            |                                                       |                 |
|------------|-------------------------------------------------------|-----------------|
|            | <b>Analytical code</b>                                | <b>YVX1.289</b> |
| t = 0 min  | Activity fixed on QMA                                 | 7.71 GBq        |
| t = 62 min | Activity in the collecting vial                       | 292 MBq         |
|            | t <sub>R</sub> radio of [ <sup>18</sup> F] <b>11a</b> | 9.12 min        |
|            | Radiochemical purity of [ <sup>18</sup> F] <b>11a</b> | 85%             |
|            | Activity Yield                                        | 4%              |
|            | <b>RCY (decay corrected)</b>                          | 6%              |

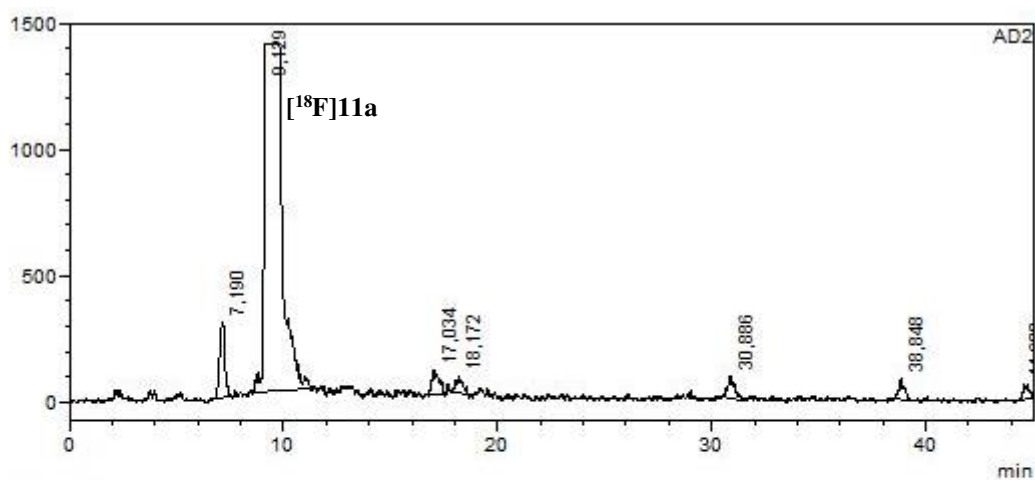

<Peak Table>

| Peak# | Ret. Time | Area     | Height  | Conc.  | Unit | Mark | Name |
|-------|-----------|----------|---------|--------|------|------|------|
| 1     | 7.190     | 5231744  | 298828  | 5,551  |      | M    |      |
| 2     | 9.129     | 80665856 | 1371793 | 85,588 |      | M    |      |
| 3     | 17.034    | 2325366  | 98554   | 2,467  |      | M    |      |
| 4     | 18.172    | 1493279  | 69024   | 1,584  |      | M    |      |
| 5     | 30.886    | 1905728  | 88062   | 2,022  |      | M    |      |
| 6     | 38.848    | 1481647  | 82447   | 1,572  |      | M    |      |
| 7     | 44.608    | 1145128  | 60531   | 1,215  |      | M    |      |
| Total |           | 94248748 | 2069239 |        |      |      |      |

Analytic Radio HPLC chromatogram of experiment 8a



Experiment 8-2 (**PS-10a** (5 mg), THF (1.7 mL), AcOH (60 equiv), 100°C, 15 min, flow procedure)

|            |                                                       |          |
|------------|-------------------------------------------------------|----------|
|            | <b>Analytical code</b>                                | YVX1.294 |
| t = 0 min  | Activity fixed on QMA                                 | 10.1 GBq |
| t = 51 min | Activity in the collecting vial                       | 504 MBq  |
|            | t <sub>R</sub> radio of [ <sup>18</sup> F] <b>11a</b> | 8.99 min |
|            | Radiochemical purity of [ <sup>18</sup> F] <b>11a</b> | 89%      |
|            | Activity Yield                                        | 5%       |
|            | <b>RCY (decay corrected)</b>                          | 7%       |

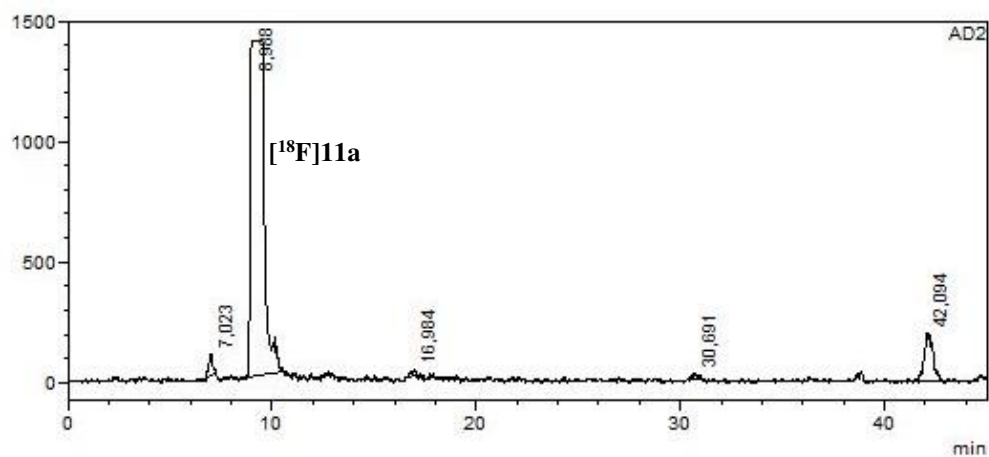

<Peak Table>

| Peak# | Ret. Time | Area     | Height  | Conc.  | Unit | Mark | Name |
|-------|-----------|----------|---------|--------|------|------|------|
| 1     | 7.023     | 1167049  | 89489   | 1,628  |      | M    |      |
| 2     | 8.988     | 64007831 | 1390166 | 89,293 |      | M    |      |
| 3     | 16.984    | 353231   | 27585   | 0.493  |      | M    |      |
| 4     | 30.691    | 398546   | 25040   | 0,556  |      | M    |      |
| 5     | 42.094    | 5756648  | 196364  | 8,031  |      | M    |      |
| Total |           | 71683304 | 1728643 |        |      |      |      |

Analytic Radio HPLC chromatogram of Experiment 8b

c. Radiosyntheses of [ $^{18}\text{F}$ ]11b, [ $^{18}\text{F}$ ]11c and [ $^{18}\text{F}$ ]11d

1) Radiosynthesis of [ $^{18}\text{F}$ ]11b using the “Batch procedure”

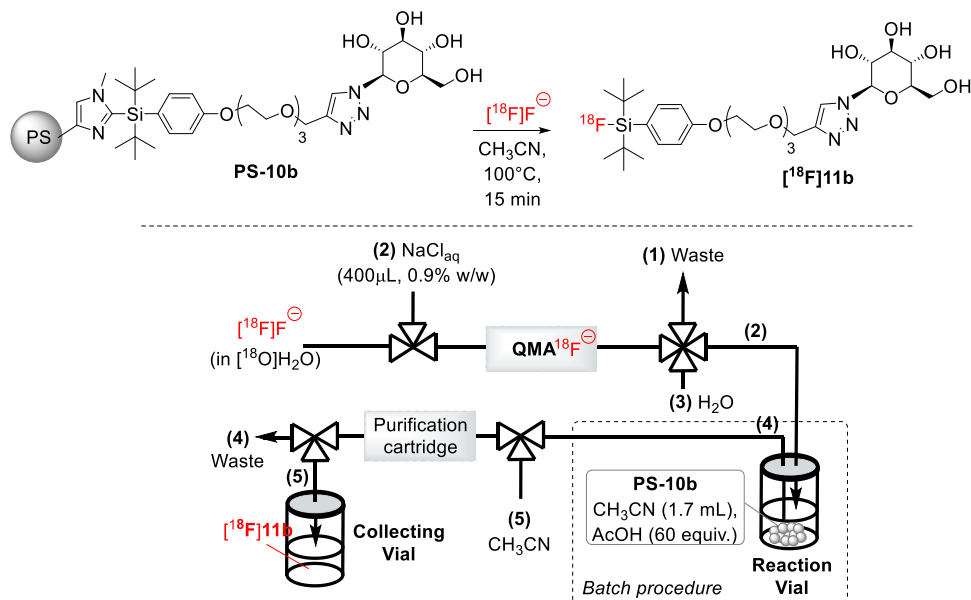

Polymer **PS-10b** (5mg,  $\approx 0.34$  mmol/g ImidSiFA grafted, 100% conversion for the CuAAC conjugation step) was added in the reaction vial (reactor R1) with acetic acid (60 eq) in acetonitrile (1.7 mL). Then, [ $^{18}\text{F}$ ]fluoride was automatically transferred into the synthesizer into syringe 2 and trapped by passing the solution through an anion-exchange resin cartridge (Sep-Pak QMA light, Waters). Release of [ $^{18}\text{F}$ ]fluoride from QMA cartridge was achieved by eluting an aqueous solution of NaCl (0.9% w/w, 400  $\mu\text{L}$ ) with syringe 1 to the reaction vial R1 previously loaded (only 300  $\mu\text{L}$  of this solution could be transferred effectively in R1 due to the dead volume of the system). The pinch of the reactor was closed and the resulting mixture was allowed to react at 100°C for 15 min. The mixture was then cooled at 40°C and homogenized by nitrogen bubbling at low flow for 1 min (400mbar concomitant with a vacuum set at -40 mbar). Then, the reaction mixture was collected with syringe 3. The reactor was washed by adding 2 mL of a 1:1 mixture of acetonitrile and water (using syringe 4). The content was homogenized again by nitrogen bubbling at low flow for 1 min (400mbar concomitant with a vacuum set at -40 mbar) and the content of the vial was collected using syringe 3. The reactor was washed a third time with water (4mL), homogenized under N<sub>2</sub> bubbling for 1 min as previously described and collected using syringe 3. The full content of syringe 3 (containing 66% of water) was passed through a C18 Sep-Pak cartridge at 3mL/min until emptiness. Then, the cartridge was washed with additional water (4mL) at 3mL/min using syringe 4. Finally, the product was eluted at 1mL/min from the C18 Sep-Pak cartridge using acetonitrile (4mL, from syringe 4) to the collecting vial (valve 14) placed outside of the hotcell<sup>®</sup>. The radiochemical yield (RCY) was calculated from the decay-corrected activity inside the collecting vial divided by activity in the reaction vial R1 before the fluorination (at the time where fluoride-18 was fully eluted from the QMA to R1) and multiplied by the radiochemical purity (RCP). The purity of the fluorinated compound [ $^{18}\text{F}$ ]11b was checked from a sample by analytical HPLC at a flow rate of 1mL/min using the following program: 70% of B (8 min) -> 95% of B (5min) -> 95% of B (5min) -> 70% of B (3 min) with A = water + 0,1% of formic acid and B = ACN + 0,1% of formic acid. The desired compound [ $^{18}\text{F}$ ]11b was detected by radio HPLC ( $t_{\text{R radio}} \approx 6.6$  min).

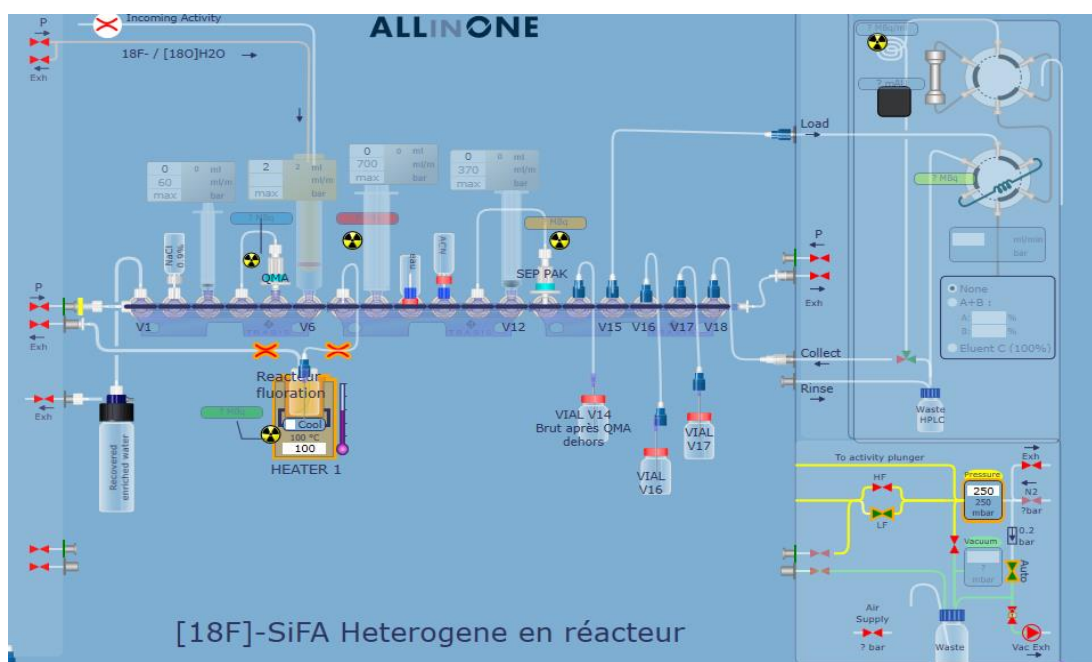

**Layout of the cassette for the synthesis of [<sup>18</sup>F]11b by the “Batch procedure”**

Results of the experiments are summarized in the following table:

| Experiment<br>(nb of runs) | Conditions                                                                      | RCY of<br>[ <sup>18</sup> F]11b (%) | RCP of<br>[ <sup>18</sup> F]11b (%) | Final Activity<br>(MBq) |
|----------------------------|---------------------------------------------------------------------------------|-------------------------------------|-------------------------------------|-------------------------|
| <b>9 (n = 3)</b>           | <b>PS-10b (5 mg), CH<sub>3</sub>CN (1.7 mL), AcOH (60 equiv), 100°C, 15 min</b> | <b>12 ± 2<sup>a</sup></b>           | <b>&gt;98</b>                       | <b>-</b>                |
| 9-1 (n = 1)                | PS-10b (5 mg), CH <sub>3</sub> CN (1.7 mL), AcOH (60 equiv), 100°C, 15 min      | 17                                  | >98                                 | 845                     |
| 9-2 (n = 1)                | PS-10b (5 mg), CH <sub>3</sub> CN (1.7 mL), AcOH (60 equiv), 100°C, 15 min      | 15                                  | >98                                 | 1269                    |
| 9-3 (n = 1)                | PS-10b (5 mg), CH <sub>3</sub> CN (1.7 mL), AcOH (60 equiv), 100°C, 15 min      | 19                                  | >98                                 | 1173                    |

<sup>a</sup> mean ± standard deviation of the 3 experiments

Experiment 9-1 (**PS-10b** (5 mg), THF (1.7 mL), AcOH (60 equiv), 100°C, 15 min)

|            |                                                                  |                 |
|------------|------------------------------------------------------------------|-----------------|
|            | <b>Analytical code</b>                                           | <b>YVX1.362</b> |
|            | Activity fixed on QMA                                            | 6.61 GBq        |
| t = 0 min  | Activity eluted in R1                                            | 6.54 GBq        |
| t = 17 min | Activity in R1 (end of fluorination)                             | 5.82 GBq        |
| t = 40 min | Activity in the collecting vial                                  | 845 MBq         |
|            | t <sub>R</sub> <sup>radio</sup> of [ <sup>18</sup> F] <b>11b</b> | 6.04 min        |
|            | Radiochemical purity of [ <sup>18</sup> F] <b>11b</b>            | >98%            |
|            | Activity Yield                                                   | 13 %            |
|            | <b>RCY (decay corrected)</b>                                     | <b>17 %</b>     |

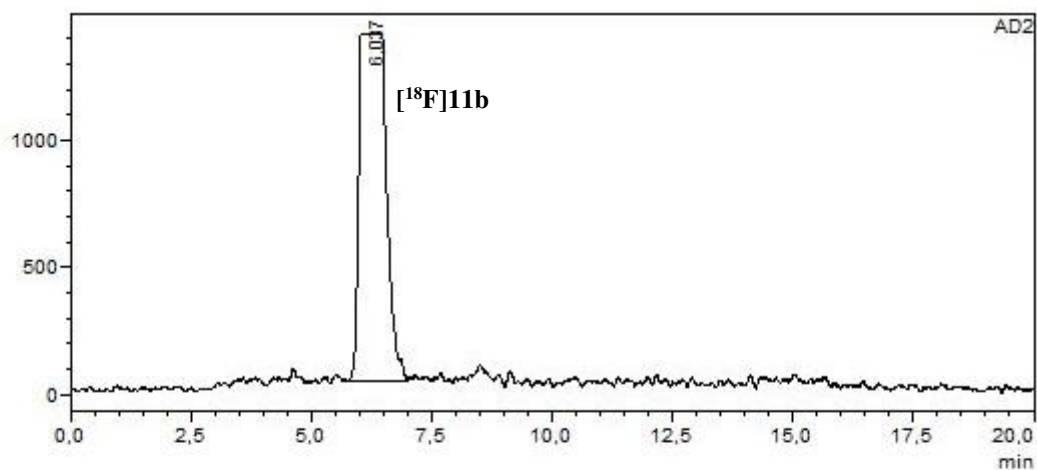

<Peak Table>

| AD2   |           |          |         |         |      |      |      |
|-------|-----------|----------|---------|---------|------|------|------|
| Peak# | Ret. Time | Area     | Height  | Conc.   | Unit | Mark | Name |
| 1     | 6,037     | 52856138 | 1361284 | 100,000 |      | M    |      |
| Total |           | 52856138 | 1361284 |         |      |      |      |

Analytic Radio HPLC chromatogram of Experiment 9a

Experiment 9-2 (**PS-10b** (5 mg), THF (1.7 mL), AcOH (60 equiv), 100°C, 15 min)

|            |                                                                  |                 |
|------------|------------------------------------------------------------------|-----------------|
|            | <b>Analytical code</b>                                           | <b>YVX1.363</b> |
|            | Activity fixed on QMA                                            | 11.26 GBq       |
| t = 0 min  | Activity eluted in R1                                            | 10.94 GBq       |
| t = 19 min | Activity in R1 (end of fluorination)                             | 9.51 GBq        |
| t = 45 min | Activity in the collecting vial                                  | 1269 MBq        |
|            | t <sub>R</sub> <sup>radio</sup> of [ <sup>18</sup> F] <b>11b</b> | 7.09 min        |
|            | Radiochemical purity of [ <sup>18</sup> F] <b>11b</b>            | >98%            |
|            | Activity Yield                                                   | 12 %            |
|            | <b>RCY (decay corrected)</b>                                     | <b>15 %</b>     |

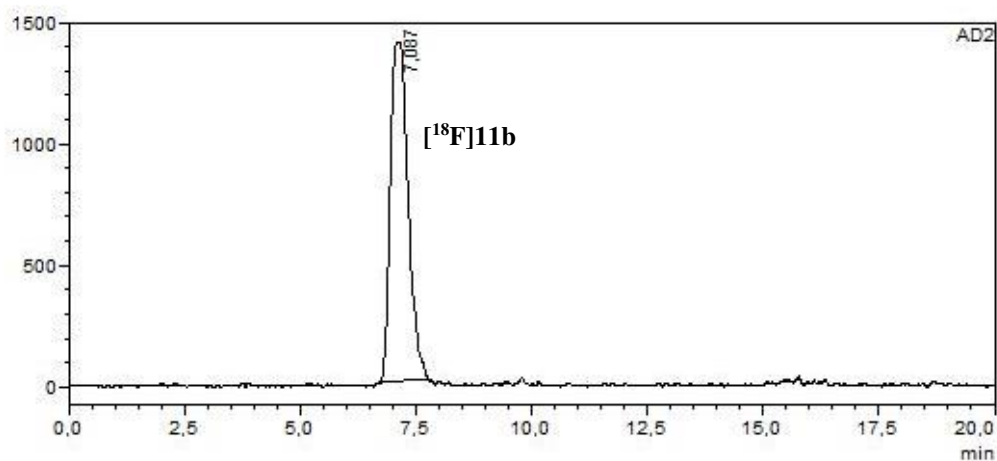

<Peak Table>

| AD2   |           |          |         |         |      |      |      |
|-------|-----------|----------|---------|---------|------|------|------|
| Peak# | Ret. Time | Area     | Height  | Conc.   | Unit | Mark | Name |
| 1     | 7.087     | 37280902 | 1390513 | 100,000 |      | M    |      |
| Total |           | 37280902 | 1390513 |         |      |      |      |

Analytic Radio HPLC chromatogram of Experiment 9b

Experience 9-3 (**PS-10b** (5 mg), THF (1.7 mL), AcOH (60 equiv), 100°C, 15 min)

|            |                                                                  |                 |
|------------|------------------------------------------------------------------|-----------------|
|            | <b>Analytical code</b>                                           | <b>YVX1.364</b> |
|            | Activity fixed on QMA                                            | 7.75 GBq        |
| t = 0 min  | Activity eluted in R1                                            | 7.80 GBq        |
| t = 17 min | Activity in R1 (end of fluorination)                             | 7.15 GBq        |
| t = 39 min | Activity in the collecting vial                                  | 1173 MBq        |
|            | t <sub>R</sub> <sup>radio</sup> of [ <sup>18</sup> F] <b>11b</b> | 7.07 min        |
|            | Radiochemical purity of [ <sup>18</sup> F] <b>11b</b>            | >98%            |
|            | Activity Yield                                                   | 15%             |
|            | <b>RCY (decay corrected)</b>                                     | <b>19%</b>      |

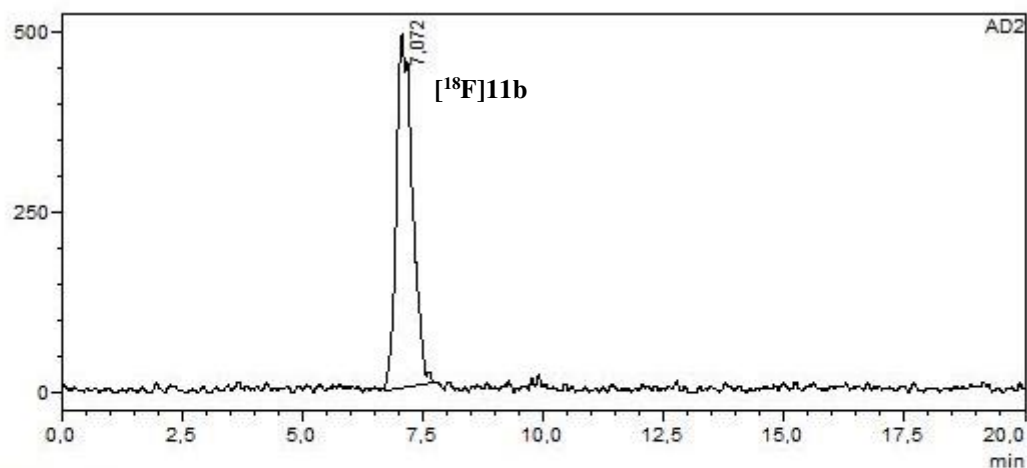

<Peak Table>

| Peak# | Ret. Time | Area     | Height | Conc.   | Unit | Mark | Name |
|-------|-----------|----------|--------|---------|------|------|------|
| 1     | 7,072     | 11419055 | 488664 | 100,000 |      | M    |      |
| Total |           | 11419055 | 488664 |         |      |      |      |

Analytic Radio HPLC chromatogram of Experiment 9c

## 2) Radiosynthesis of [ $^{18}\text{F}$ ]**11c** using the “Batch procedure”

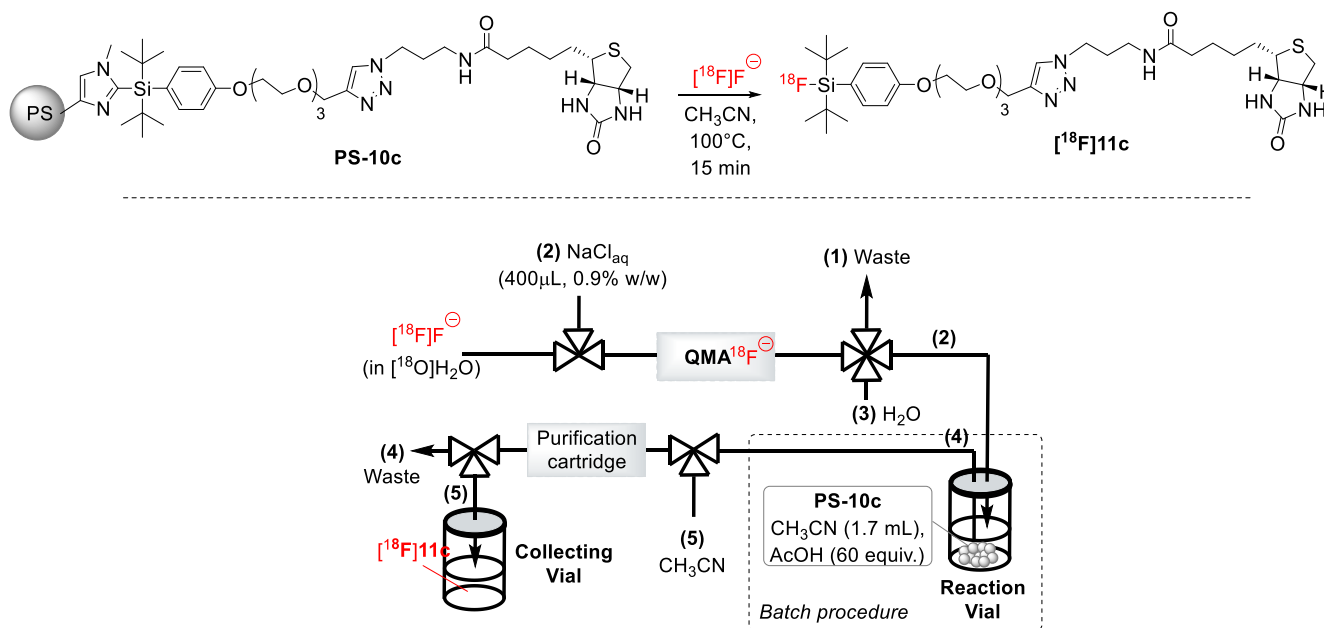

Polymer **PS-10c** (5mg,  $\approx 0.32$  mmol/g ImidSiFA grafted, 100% conversion for the CuAAC conjugation step) was added in the reaction vial (reactor R1) with acetic acid (60 eq) in acetonitrile (1.7 mL). Then, [ $^{18}\text{F}$ ]fluoride was automatically transferred into the synthesizer into syringe 2 and trapped by passing the solution through an anion-exchange resin cartridge (Sep-Pak QMA light, Waters). Release of [ $^{18}\text{F}$ ]fluoride from QMA cartridge was achieved by eluting an aqueous solution of NaCl (0.9% w/w, 400  $\mu\text{L}$ ) with syringe 1 to the reaction vial R1 previously loaded (only 300  $\mu\text{L}$  of this solution could be transferred effectively in R1 due to the dead volume of the system). The pinch of the reactor was closed and the resulting mixture was allowed to react at  $100^\circ\text{C}$  for 15 min. The mixture was then cooled at  $40^\circ\text{C}$  and homogenized by nitrogen bubbling at low flow for 1 min (400mbar concomitant with a vacuum set at -40 mbar). Then, the reaction mixture was collected with syringe 3. The reactor was washed by adding 2 mL of a 1:1 mixture of acetonitrile and water (using syringe 4). The content was homogenized again by nitrogen bubbling at low flow for 1 min (400mbar concomitant with a vacuum set at -40 mbar) and the content of the vial was collected using syringe 3. The reactor was washed a third time with water (4mL), homogenized under  $\text{N}_2$  bubbling for 1 min as previously described and collected using syringe 3. The full content of syringe 3 (containing 66% of water) was passed through a C18 Sep-Pak cartridge at 3mL/min until emptiness. Then, the cartridge was washed with additional water (4mL) at 3mL/min using syringe 4. Finally, the product was eluted at 1mL/min from the C18 Sep-Pak cartridge using acetonitrile (4mL, from syringe 4) to the collecting vial (valve 14) placed outside of the hotcell<sup>®</sup>. The radiochemical yield (RCY) was calculated from the decay-corrected activity inside the collecting vial divided by activity in the reaction vial R1 before the fluorination (at the time where fluoride-18 was fully eluted from the QMA to R1) and multiplied by the radiochemical purity (RCP). The purity of the fluorinated compound [ $^{18}\text{F}$ ]**11c** was checked by analytical HPLC at a flow rate of 1mL/min using program 1 (75% of B (8 min) -> 95% of B (5min) -> 95% of B (5min)-> 75% of B (3 min)) or program 2 (70% of B (8 min) -> 95% of B (5min) -> 95% of B (5min)-> 70% of B (3 min)) with A = water + 0.1% of formic acid and B =  $\text{CH}_3\text{CN}$  + 0.1% of formic acid. The desired compound [ $^{18}\text{F}$ ]**11c** was detected by radio HPLC ( $t_{\text{R}}^{\text{radio}} \approx 7.0$  min or 8.9 min).

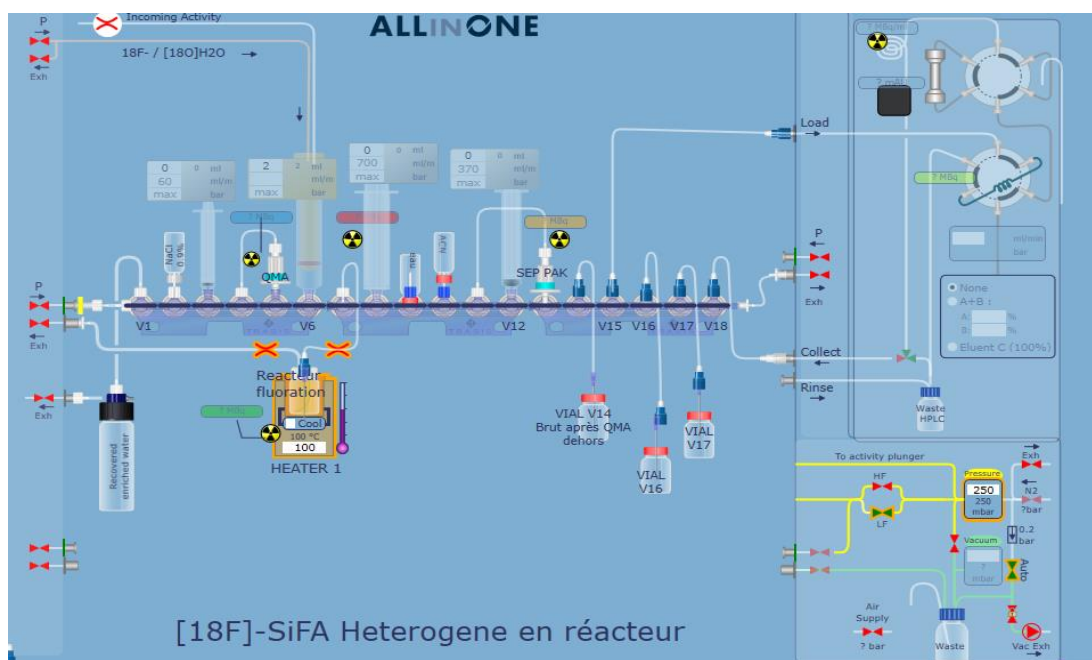

**Layout of the cassette for the synthesis of [<sup>18</sup>F]11c by the “Batch procedure”**

Results of the experiments are summarized in the following table:

| Experiment<br>(nb of runs) | Conditions                                                                      | RCY of<br>[ <sup>18</sup> F]11c (%) | RCP of<br>[ <sup>18</sup> F]11c (%) | Final Activity<br>(MBq) |
|----------------------------|---------------------------------------------------------------------------------|-------------------------------------|-------------------------------------|-------------------------|
| <b>10 (n = 3)</b>          | <b>PS-10c (5 mg), CH<sub>3</sub>CN (1.7 mL), AcOH (60 equiv), 100°C, 15 min</b> | <b>13 ± 1<sup>a</sup></b>           | <b>86 ± 7<sup>a</sup></b>           | -                       |
| 10-1 (n = 1)               | PS-10c (5 mg), CH <sub>3</sub> CN (1.7 mL), AcOH (60 equiv), 100°C, 15 min      | 14                                  | 78                                  | 973                     |
| 10-2 (n = 1)               | PS-10c (5 mg), CH <sub>3</sub> CN (1.7 mL), AcOH (60 equiv), 100°C, 15 min      | 12                                  | 89                                  | 752                     |
| 10-3 (n = 1)               | PS-10c (5 mg), CH <sub>3</sub> CN (1.7 mL), AcOH (60 equiv), 100°C, 15 min      | 13                                  | 90                                  | 860                     |

<sup>a</sup> mean ± standard deviation of the 3 experiments



Experiment 10-1 (PS-10c (5 mg), THF (1.7 mL), AcOH (60 equiv), 100°C, 15 min)

|            |                                               |           |
|------------|-----------------------------------------------|-----------|
|            | Analytical code                               | YVX1.377  |
|            | Activity fixed on QMA                         | 10.00 GBq |
| t = 0 min  | Activity eluted in R1                         | 9.20 GBq  |
| t = 17 min | Activity in R1 (end of fluorination)          | 8.02 GBq  |
| t = 40 min | Activity in the collecting vial               | 973 MBq   |
|            | t <sub>R</sub> radio of [ <sup>18</sup> F]11c | 6.90 min  |
|            | Radiochemical purity of [ <sup>18</sup> F]11c | 78%       |
|            | Activity Yield                                | 11%       |
|            | RCY (decay corrected)                         | 14%       |

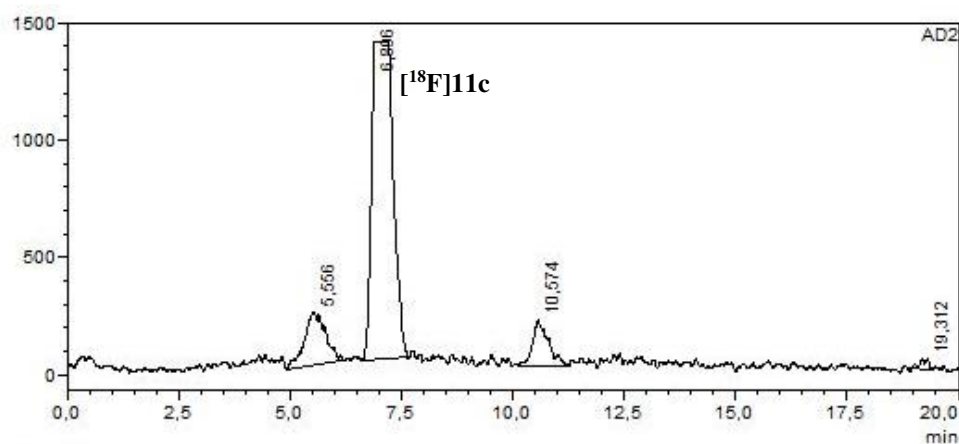

<Peak Table>

| Peak# | Ret. Time | Area     | Height  | Conc.  | Unit | Mark | Name |
|-------|-----------|----------|---------|--------|------|------|------|
| 1     | 5.556     | 7519649  | 222039  | 13,037 |      | M    |      |
| 2     | 6.896     | 44897722 | 1350733 | 77,840 |      | M    |      |
| 3     | 10.574    | 4654771  | 191779  | 8,070  |      | M    |      |
| 4     | 19.312    | 607595   | 49096   | 1,053  |      | M    |      |
| Total |           | 57679737 | 1813647 |        |      |      |      |

Analytic Radio HPLC chromatogram of experiment 10-1

Experiment 10-2 (PS-10c (5 mg), THF (1.7 mL), AcOH (60 equiv), 100°C, 15 min)

|            |                                               |          |
|------------|-----------------------------------------------|----------|
|            | Analytical code                               | YVX1.378 |
|            | Activity fixed on QMA                         | 9.08 GBq |
| t = 0 min  | Activity eluted in R1                         | 8.20 GBq |
| t = 16 min | Activity in R1 (end of fluorination)          | 7.2 GBq  |
| t = 42 min | Activity in the collecting vial               | 752 MBq  |
|            | t <sub>R</sub> radio of [ <sup>18</sup> F]11c | 7.93 min |
|            | Radiochemical purity of [ <sup>18</sup> F]11c | 89%      |
|            | Activity Yield                                | 9%       |
|            | RCY (decay corrected)                         | 12%      |

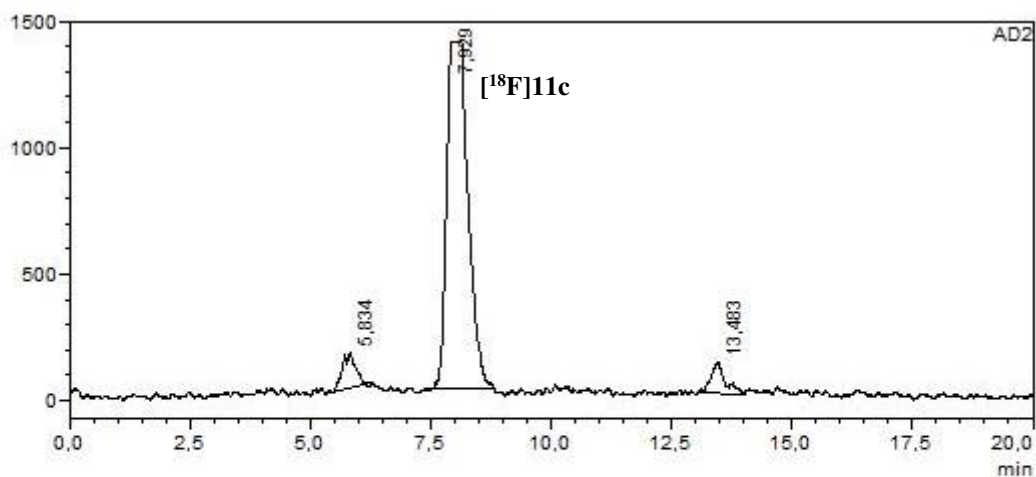

<Peak Table>

| Peak# | Ret. Time | Area     | Height  | Conc.  | Unit | Mark | Name |
|-------|-----------|----------|---------|--------|------|------|------|
| 1     | 5.834     | 2684579  | 142954  | 5.724  |      | M    |      |
| 2     | 7.929     | 41690838 | 1368537 | 88.894 |      | M    |      |
| 3     | 13.483    | 2524014  | 124909  | 5.382  |      | M    |      |
| Total |           | 46899432 | 1636400 |        |      |      |      |

Analytic Radio HPLC chromatogram of experiment 10-2

Experiment 10-3 (PS-10c (5 mg), THF (1.7 mL), AcOH (60 equiv), 100°C, 15 min)

|            |                                                          |                 |
|------------|----------------------------------------------------------|-----------------|
|            | <b>Analytical code</b>                                   | <b>YVX1.379</b> |
|            | Activity fixed on QMA                                    | 9.3 GBq         |
| t = 0 min  | Activity eluted in R1                                    | 8.55 GBq        |
| t = 18 min | Activity in R1 (end of fluorination)                     | 7.50 GBq        |
| t = 40 min | Activity in the collecting vial                          | 860 MBq         |
|            | t <sub>R</sub> <sup>radio</sup> of [ <sup>18</sup> F]11c | 8.02 min        |
|            | Radiochemical purity of [ <sup>18</sup> F]11c            | 90%             |
|            | Activity Yield                                           | 10%             |
|            | <b>RCY (decay corrected)</b>                             | <b>13%</b>      |

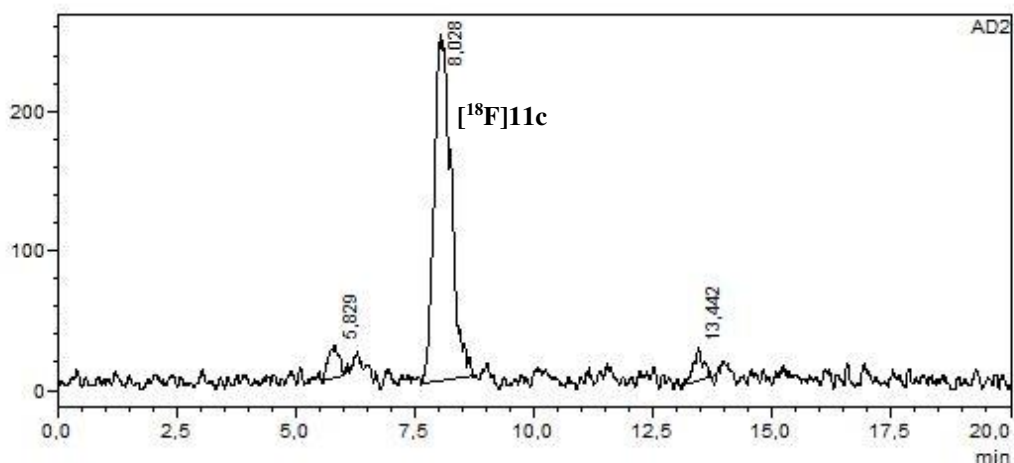

<Peak Table>

| Peak# | Ret. Time | Area    | Height | Conc.  | Unit | Mark | Name |
|-------|-----------|---------|--------|--------|------|------|------|
| 1     | 5.829     | 357165  | 22115  | 5,328  |      | M    |      |
| 2     | 8.028     | 6028292 | 246903 | 89,932 |      | M    |      |
| 3     | 13.442    | 317685  | 23898  | 4,739  |      | M    |      |
| Total |           | 6703143 | 292916 |        |      |      |      |

Analytic Radio HPLC chromatogram of experiment 10-3

### 3) Radiosynthesis of [ $^{18}\text{F}$ ]11d using the “Batch procedure”

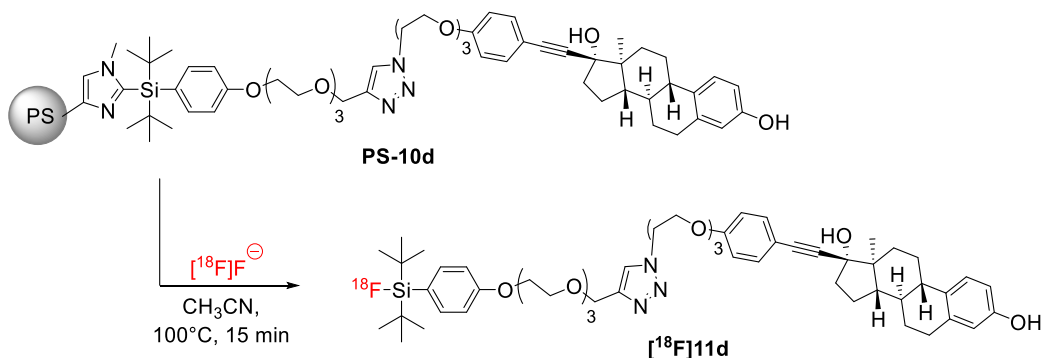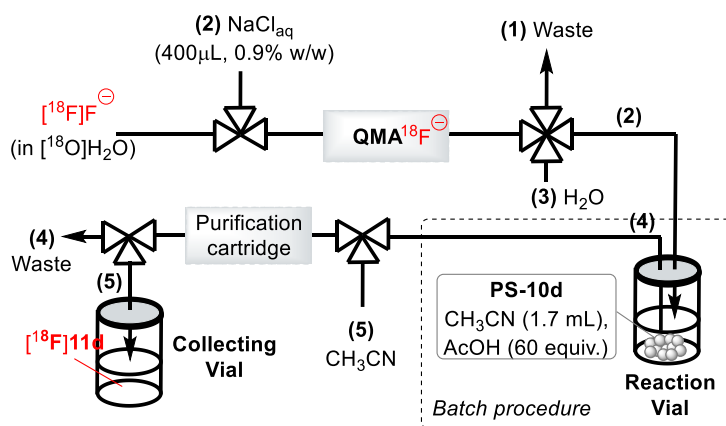

Polymer **PS-10d** (5mg,  $\approx 0.30$  mmol/g ImidSiFA grafted, 100% conversion for the CuAAC conjugation step) was added in the reaction vial (reactor R1) with acetic acid (60 eq) in acetonitrile (1.7 mL). Then, [ $^{18}\text{F}$ ]fluoride was automatically transferred into the synthesizer into syringe 2 and trapped by passing the solution through an anion-exchange resin cartridge (Sep-Pak QMA light, Waters). Release of [ $^{18}\text{F}$ ]fluoride from QMA cartridge was achieved by eluting an aqueous solution of NaCl (0.9% w/w, 400  $\mu\text{L}$ ) with syringe 1 to the reaction vial R1 previously loaded (only 300  $\mu\text{L}$  of this solution could be transferred effectively in R1 due to the dead volume of the system). The pinch of the reactor was closed and the resulting mixture was allowed to react at 100°C for 15 min. The mixture was then cooled at 40°C and homogenized by nitrogen bubbling at low flow for 1 min (400mbar concomitant with a vacuum set at -40 mbar). Then, the reaction mixture was collected with syringe 3. The reactor was washed by adding 2 mL of a 1:1 mixture of acetonitrile and water (using syringe 4). The content was homogenized again by nitrogen bubbling at low flow for 1 min (400mbar concomitant with a vacuum set at -40 mbar) and the content of the vial was collected using syringe 3. The reactor was washed a third time with water (4mL), homogenized under  $\text{N}_2$  bubbling for 1 min as previously described and collected using syringe 3. The full content of syringe 3 (containing 66% of water) was passed through a C18 Sep-Pak cartridge at 3mL/min until emptiness. Then, the cartridge was washed with additional water (4mL) at 3mL/min using syringe 4. Finally, the product was eluted at 1mL/min from the C18 Sep-Pak cartridge using acetonitrile (4mL, from syringe 4) to the collecting vial (valve 14) placed outside of the hotcell®. The radiochemical yield (RCY) was calculated from the decay-corrected activity inside the collecting vial divided by activity in the reaction vial R1 before the fluorination (at the time where fluoride-18 was fully eluted from the QMA to R1) and multiplied by the radiochemical purity (RCP). The purity of the fluorinated compound [ $^{18}\text{F}$ ]11c was checked by analytical HPLC at a flow rate of 1mL/min using the following program: 90% of B (8 min) -> 95% of

B (5min) ->95% of B (5min)-> 90% of B (3 min) with A = water + 0.1% of formic acid and B = CH<sub>3</sub>CN + 0.1% of formic acid. The desired compound [<sup>18</sup>F]11d was detected by radio HPLC ( $t_R$  radio  $\approx$  10.0 min).

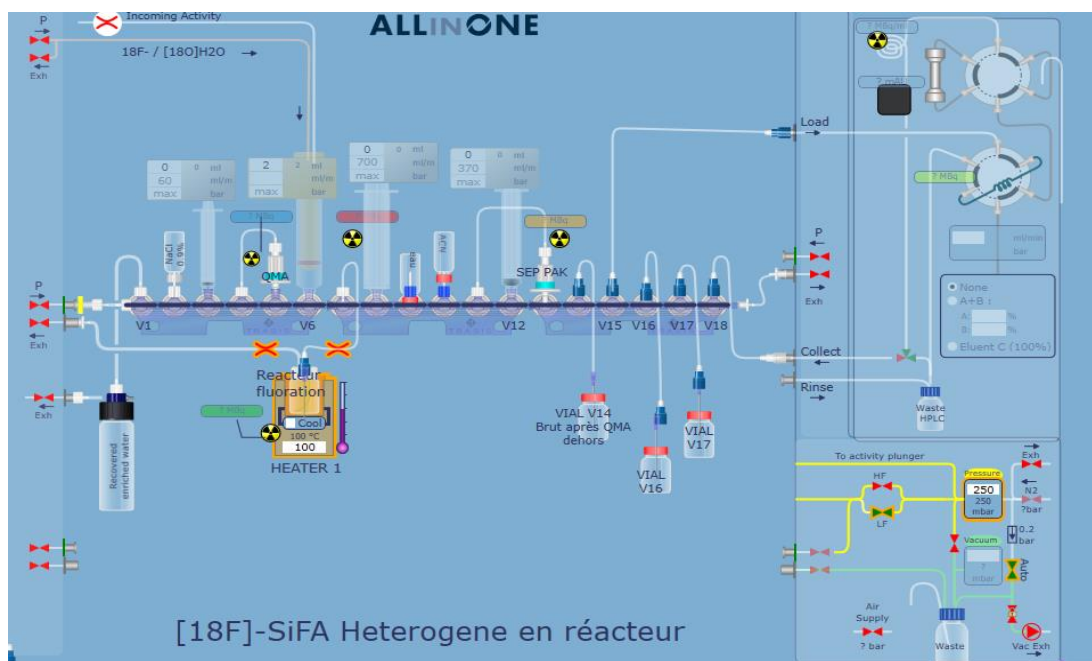

Layout of the cassette for the synthesis of [<sup>18</sup>F]11d by the “Batch procedure”

Results of the experiments are summarized in the following table:

| Experiment<br>(nb of runs) | Conditions                                                                      | RCY of<br>[ <sup>18</sup> F]11d(%) | RCP of<br>[ <sup>18</sup> F]11d (%) | Final Activity<br>(MBq) |
|----------------------------|---------------------------------------------------------------------------------|------------------------------------|-------------------------------------|-------------------------|
| <b>11 (n = 3)</b>          | <b>PS-10c (5 mg), CH<sub>3</sub>CN (1.7 mL), AcOH (60 equiv), 100°C, 15 min</b> | <b>9 ± 4<sup>a</sup></b>           | <b>71 ± 11<sup>a</sup></b>          | <b>-</b>                |
| 11-1 (n = 1)               | PS-10c (5 mg), CH <sub>3</sub> CN (1.7 mL), AcOH (60 equiv), 100°C, 15 min      | 13                                 | 81                                  | 1183                    |
| 11-2 (n = 1)               | PS-10c (5 mg), CH <sub>3</sub> CN (1.7 mL), AcOH (60 equiv), 100°C, 15 min      | 9                                  | 60                                  | 1100                    |
| 11-3 (n = 1)               | PS-10c (5 mg), CH <sub>3</sub> CN (1.7 mL), AcOH (60 equiv), 100°C, 15 min      | 6                                  | 73                                  | 524                     |

<sup>a</sup> mean ± standard deviation of the 3 experiments

Experiment 11-1 (PS-10d (5 mg), THF (1.7 mL), AcOH (60 equiv), 100°C, 15 min)

|            |                                               |           |
|------------|-----------------------------------------------|-----------|
|            | Analytical code                               | YVX1.367  |
|            | Activity fixed on QMA                         | 10.16 GBq |
| t = 0 min  | Activity eluted in R1                         | 9.49 GBq  |
| t = 16 min | Activity in R1 (end of fluorination)          | 8.24 GBq  |
| t = 43 min | Activity in the collecting vial               | 1183 MBq  |
|            | t <sub>R</sub> radio of [ <sup>18</sup> F]11d | 10.10 min |
|            | Radiochemical purity of [ <sup>18</sup> F]11d | 81%       |
|            | Activity Yield                                | 10%       |
|            | RCY (decay corrected)                         | 13%       |

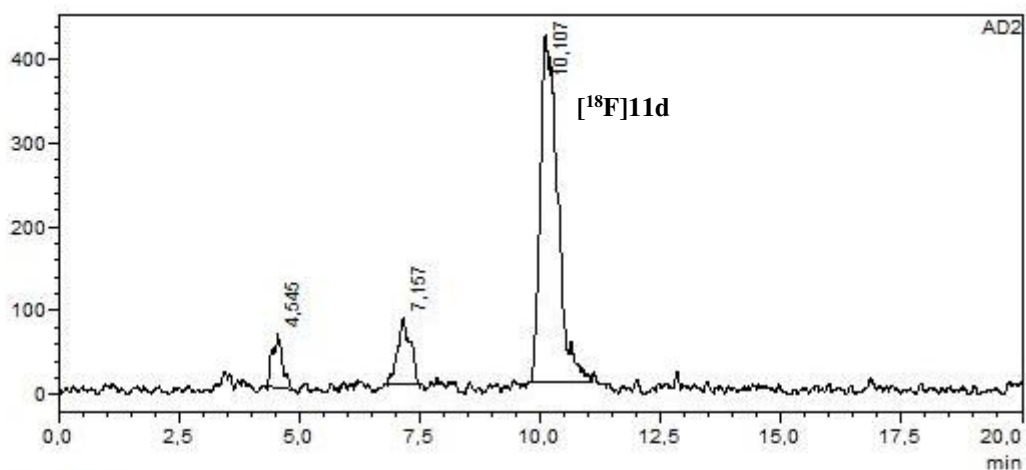

<Peak Table>

| Peak# | Ret. Time | Area     | Height | Conc.  | Unit | Mark | Name |
|-------|-----------|----------|--------|--------|------|------|------|
| 1     | 4,545     | 932668   | 64233  | 7,273  |      | M    |      |
| 2     | 7,157     | 1464953  | 79140  | 11,424 |      | M    |      |
| 3     | 10,107    | 10426098 | 414189 | 81,303 |      | M    |      |
| Total |           | 12823719 | 557562 |        |      |      |      |

Analytic Radio HPLC chromatogram of experiment 11-1

Experiment 11-2 (PS-10d (5 mg), THF (1.7 mL), AcOH (60 equiv), 100°C, 15 min)

|            |                                                          |           |
|------------|----------------------------------------------------------|-----------|
|            | Analytical code                                          | YVX1.375  |
|            | Activity fixed on QMA                                    | 10.81 GBq |
| t = 0 min  | Activity eluted in R1                                    | 9.96 GBq  |
| t = 16 min | Activity in R1 (end of fluorination)                     | 8.94 GBq  |
| t = 41 min | Activity in the collecting vial                          | 1100 MBq  |
|            | t <sub>R</sub> <sup>radio</sup> of [ <sup>18</sup> F]11d | 10.08 min |
|            | Radiochemical purity of [ <sup>18</sup> F]11d            | 60%       |
|            | Activity Yield                                           | 7%        |
|            | RCY (decay corrected)                                    | 9%        |

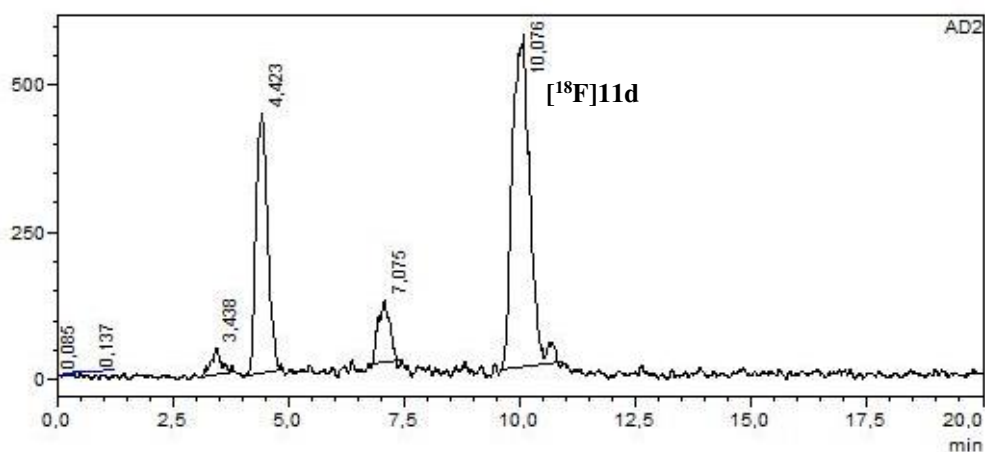

<Peak Table>

| Peak# | Ret. Time | Area     | Height  | Conc.  | Unit | Mark | Name |
|-------|-----------|----------|---------|--------|------|------|------|
| 1     | 0,085     | 4529     | 2255    | 0,018  |      |      |      |
| 2     | 0,137     | 8541     | 4161    | 0,034  |      | V    |      |
| 3     | 3,438     | 716337   | 44614   | 2,861  |      | M    |      |
| 4     | 4,423     | 7678390  | 441316  | 30,670 |      | M    |      |
| 5     | 7,075     | 1715648  | 103150  | 6,853  |      | M    |      |
| 6     | 10,076    | 14912429 | 564389  | 59,564 |      | M    |      |
| Total |           | 25035875 | 1159885 |        |      |      |      |

Analytic Radio HPLC chromatogram of experiment 11-2

Experiment 11-3 (PS-10d (5 mg), THF (1.7 mL), AcOH (60 equiv), 100°C, 15 min)

|            |                                               |          |
|------------|-----------------------------------------------|----------|
|            | Analytical code                               | YVX1.375 |
|            | Activity fixed on QMA                         | 8.69 GBq |
| t = 0 min  | Activity eluted in R1                         | 7.90 GBq |
| t = 17 min | Activity in R1 (end of fluorination)          | 7.00 GBq |
| t = 40 min | Activity in the collecting vial               | 524 MBq  |
|            | t <sub>R</sub> radio of [ <sup>18</sup> F]11d | 9.57 min |
|            | Radiochemical purity of [ <sup>18</sup> F]11d | 73%      |
|            | Activity Yield                                | 5%       |
|            | RCY (decay corrected)                         | 6%       |

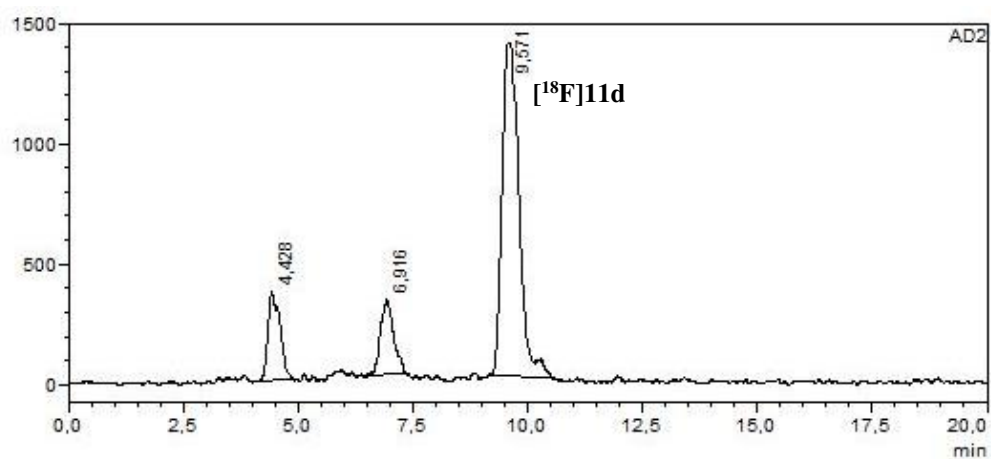

<Peak Table>

| Peak# | Ret. Time | Area     | Height  | Conc.  | Unit | Mark | Name |
|-------|-----------|----------|---------|--------|------|------|------|
| 1     | 4.428     | 6849039  | 373340  | 14,171 |      | M    |      |
| 2     | 6.916     | 6280275  | 313160  | 12,994 |      | M    |      |
| 3     | 9.571     | 35202362 | 1374857 | 72,835 |      | M    |      |
| Total |           | 48331676 | 2061357 |        |      |      |      |

Analytic Radio HPLC chromatogram of experiment 11-3



C)  $^1\text{H}$ ,  $^{13}\text{C}$ ,  $^{29}\text{Si}$  and  $^{19}\text{F}$  NMR spectra

**2-(di-*tert*-butyl(4-(methoxymethoxy)phenyl)silyl)-1-methyl-1*H*-imidazole 1**

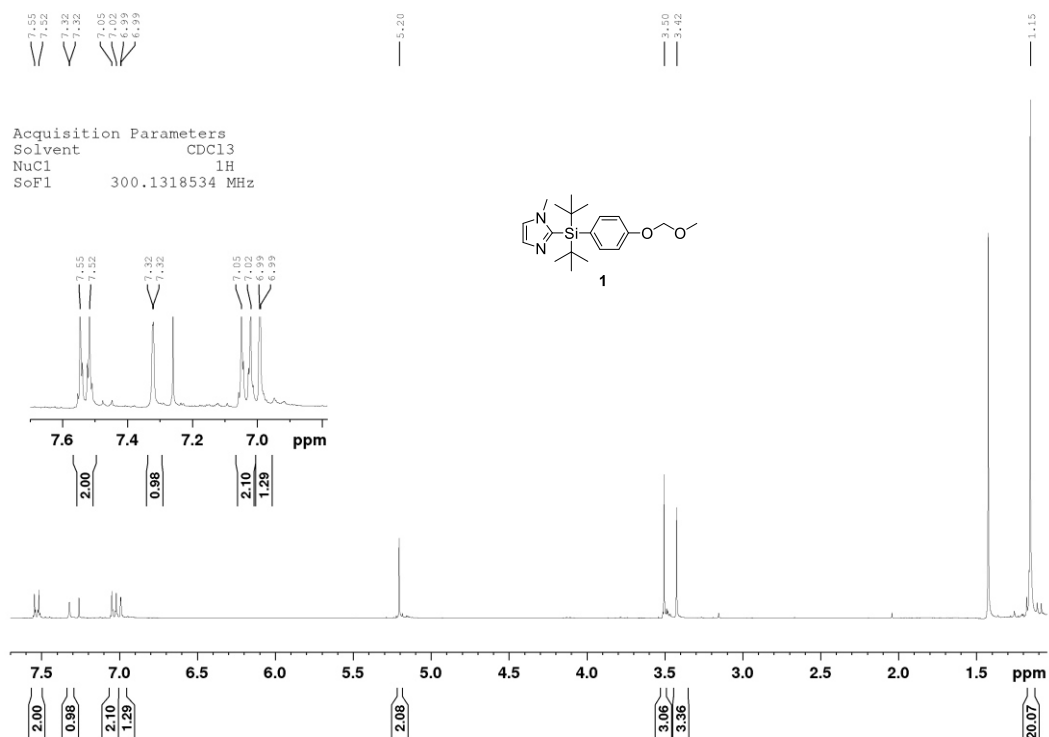

**2-(di-*tert*-butyl(4-(methoxymethoxy)phenyl)silyl)-4,5-diiodo-1-methyl-1*H*-imidazole 2**

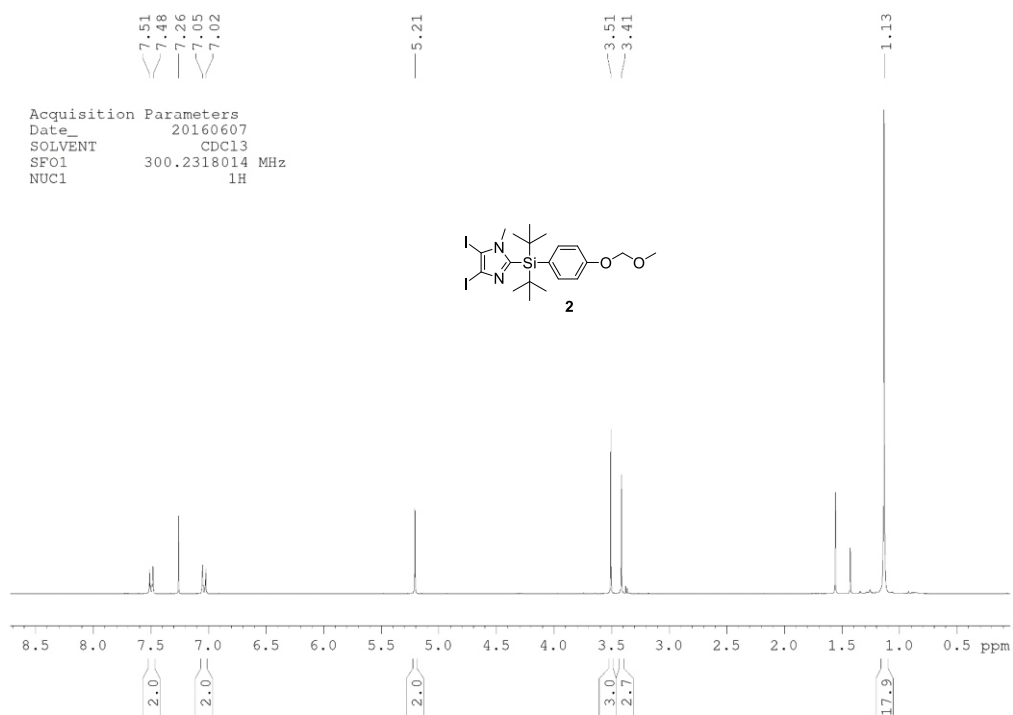

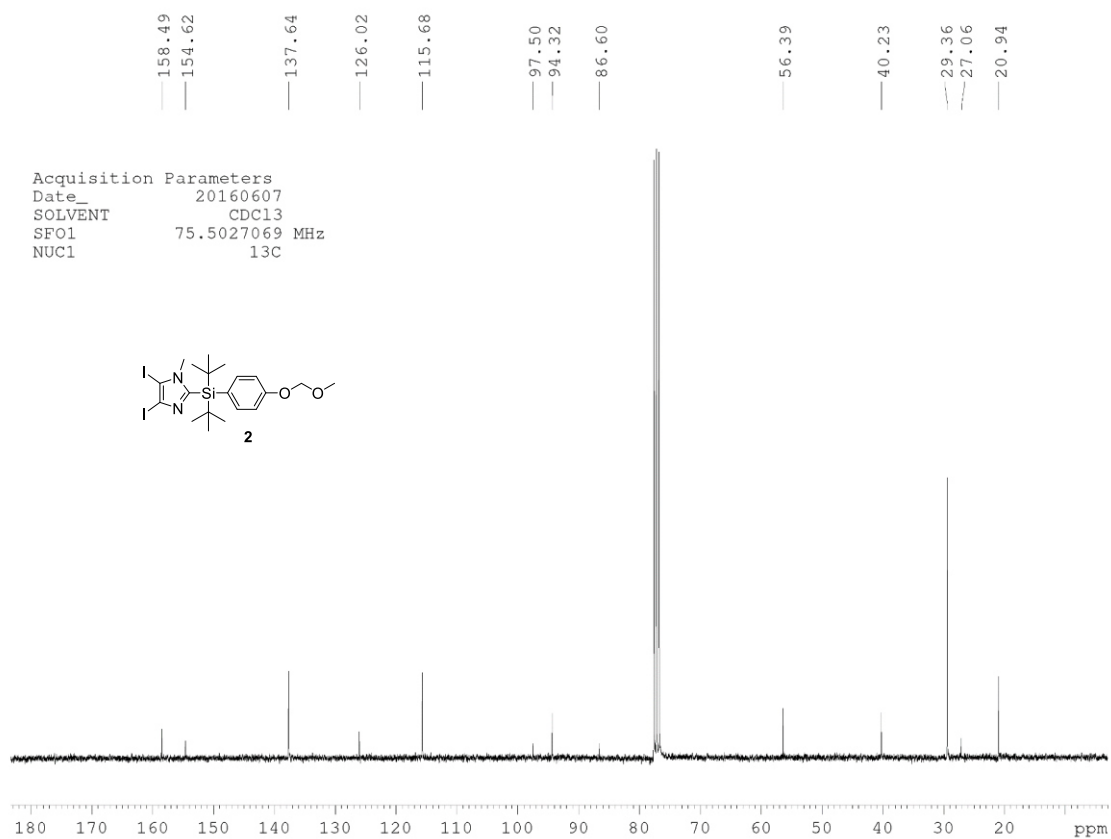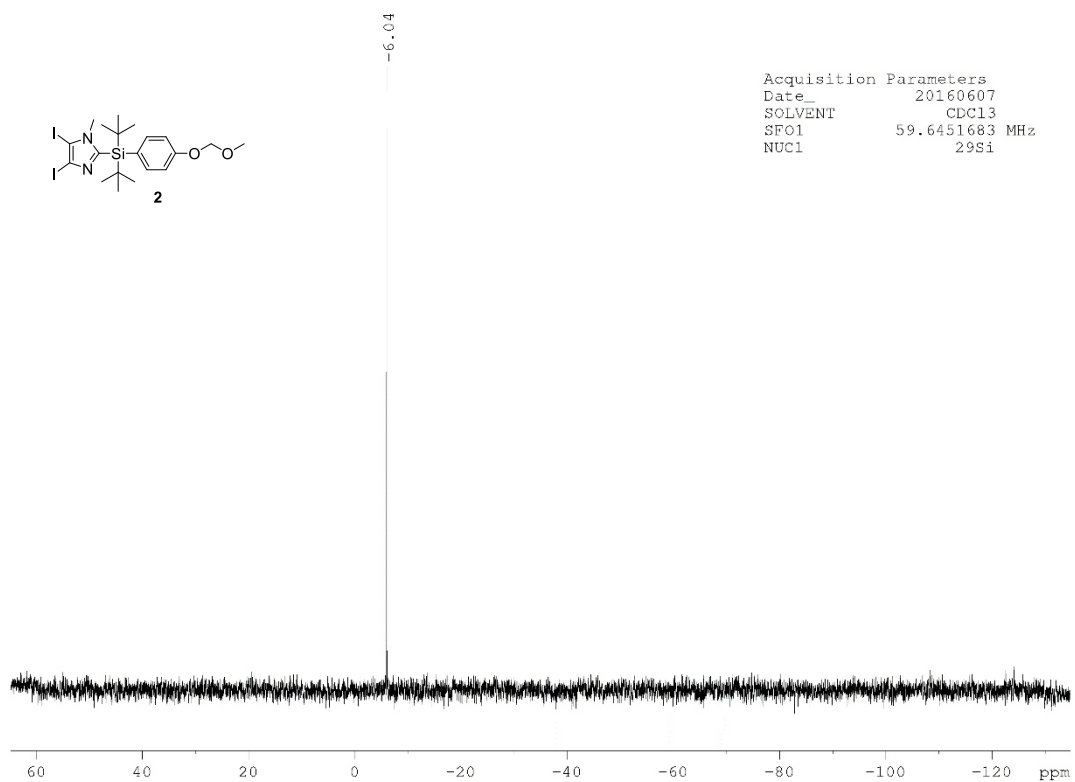

**2-(di-*tert*-butyl(4-(methoxymethoxy)phenyl)silyl)-4-iodo-1-methyl-1*H*-imidazole 3**

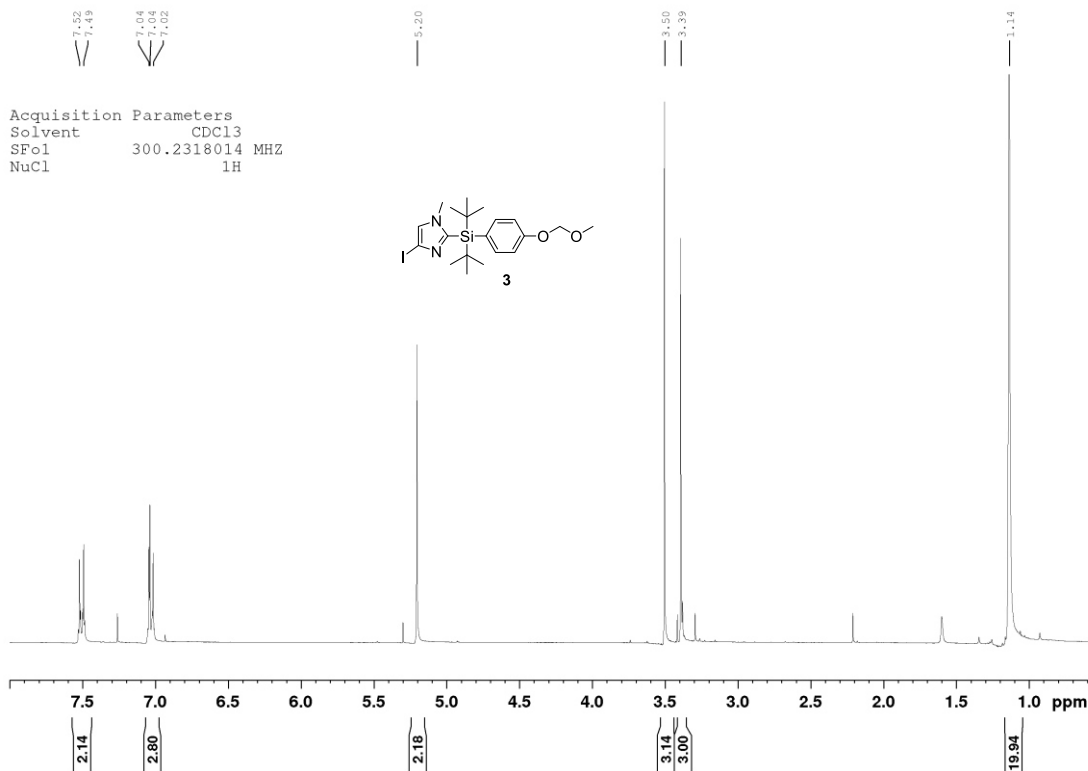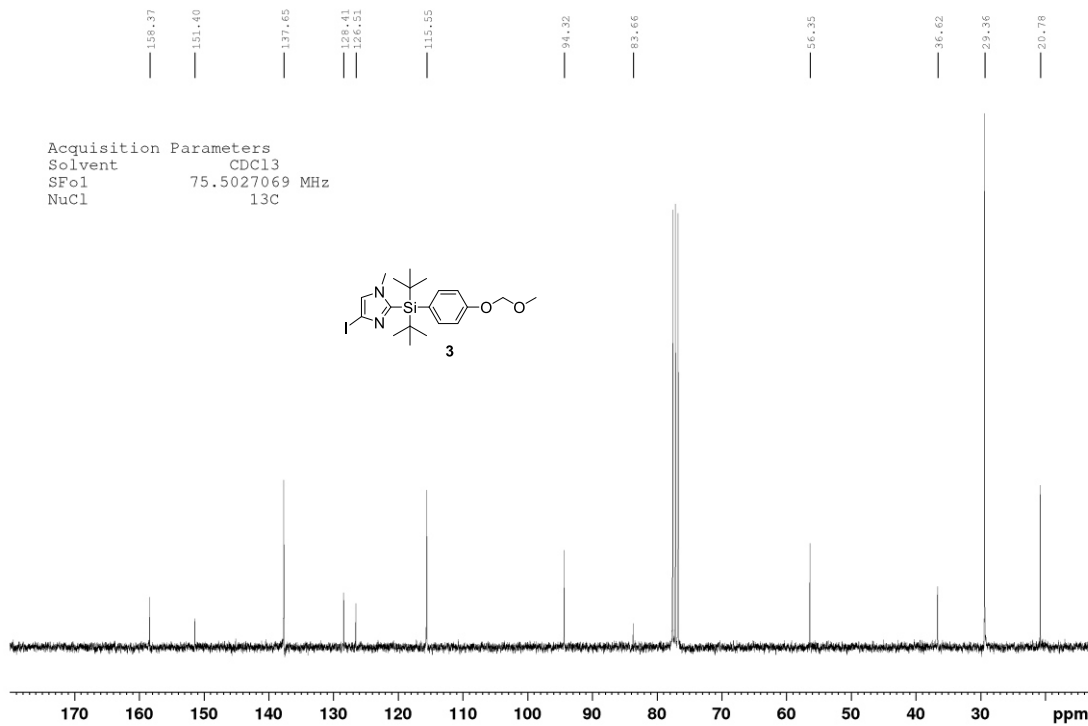

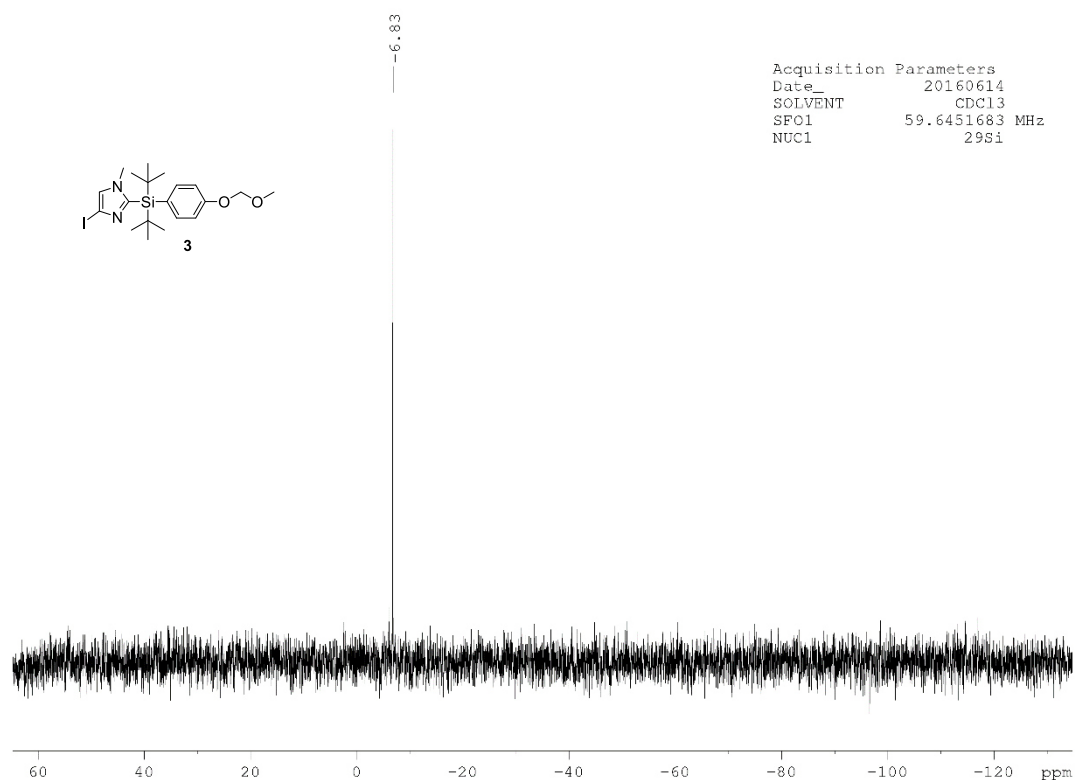

**2-(di-*tert*-butyl(4-(methoxymethoxy)phenyl)silyl)-4-(3-(benzyloxy)prop-1-ynyl)-1-methyl-1*H*-imidazole 4**

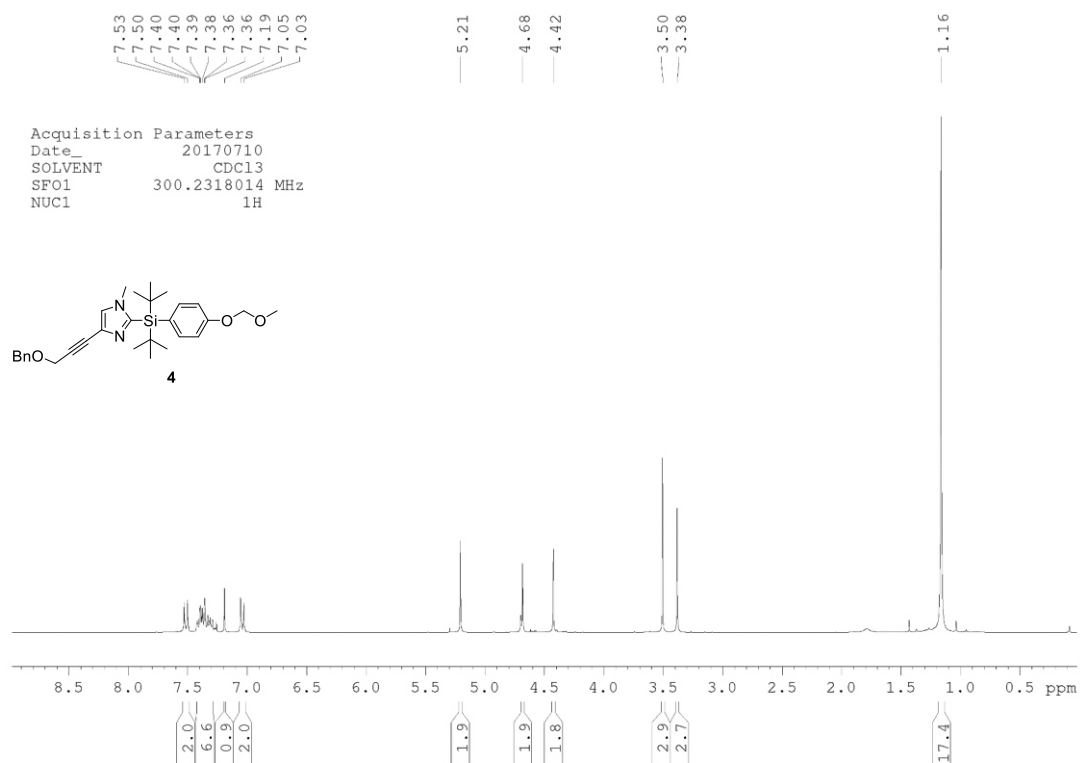

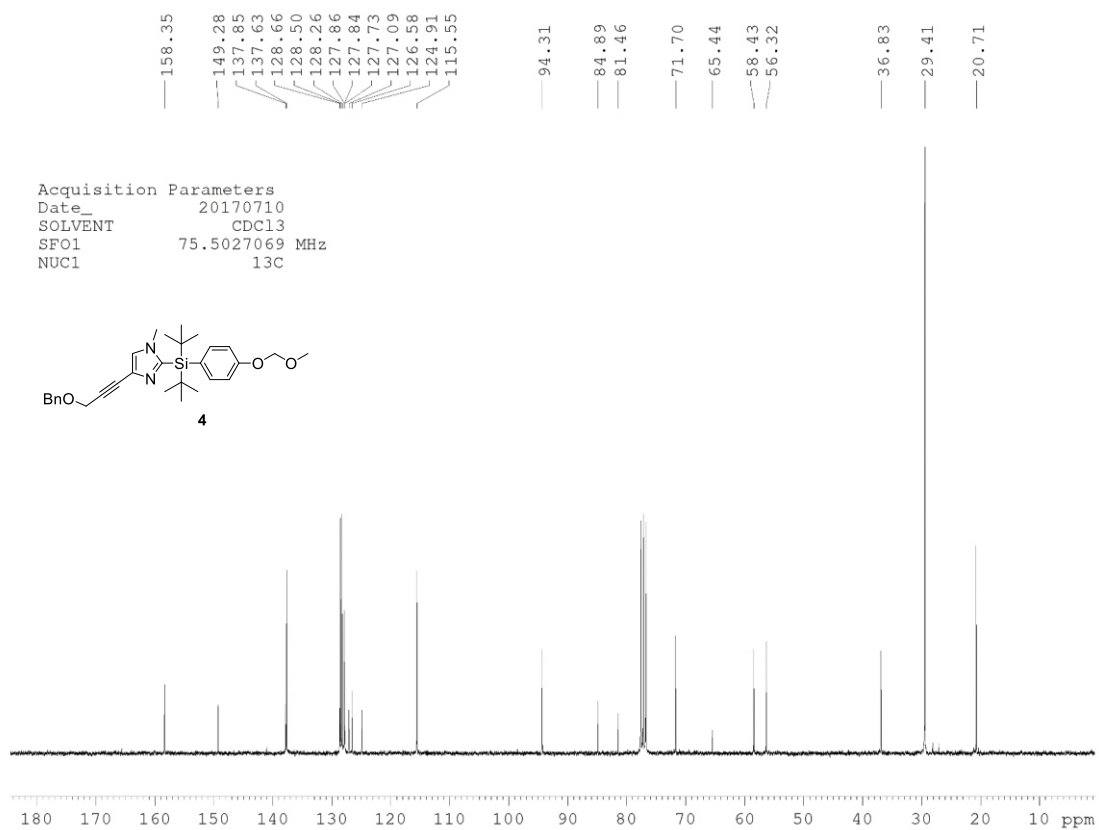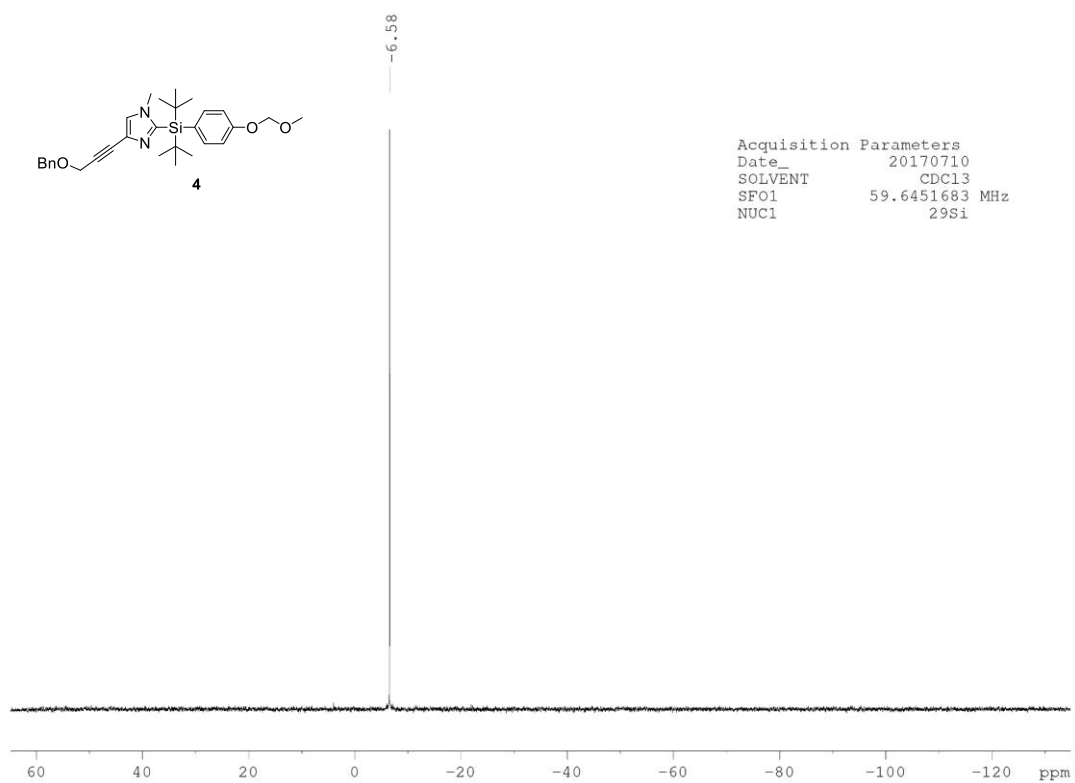

**4-(Di-*tert*-butyl(4-(3-hydroxypropyl)-1-methyl-1*H*-imidazol-2-yl)silyl)phenol 4**

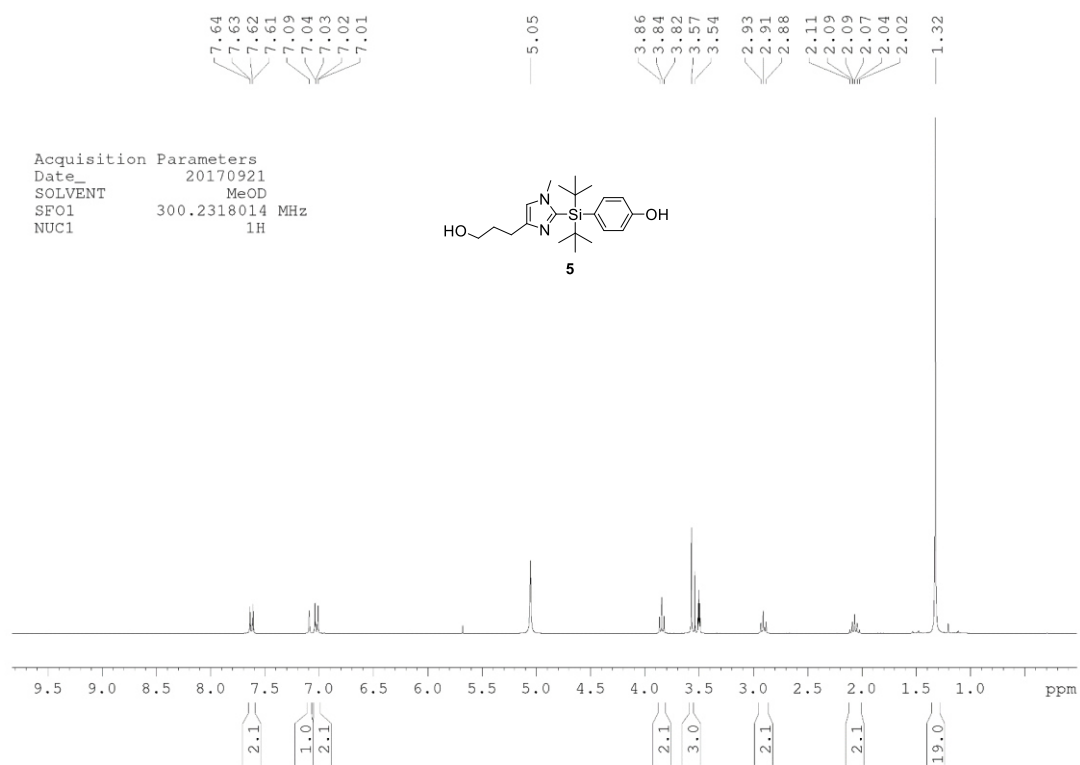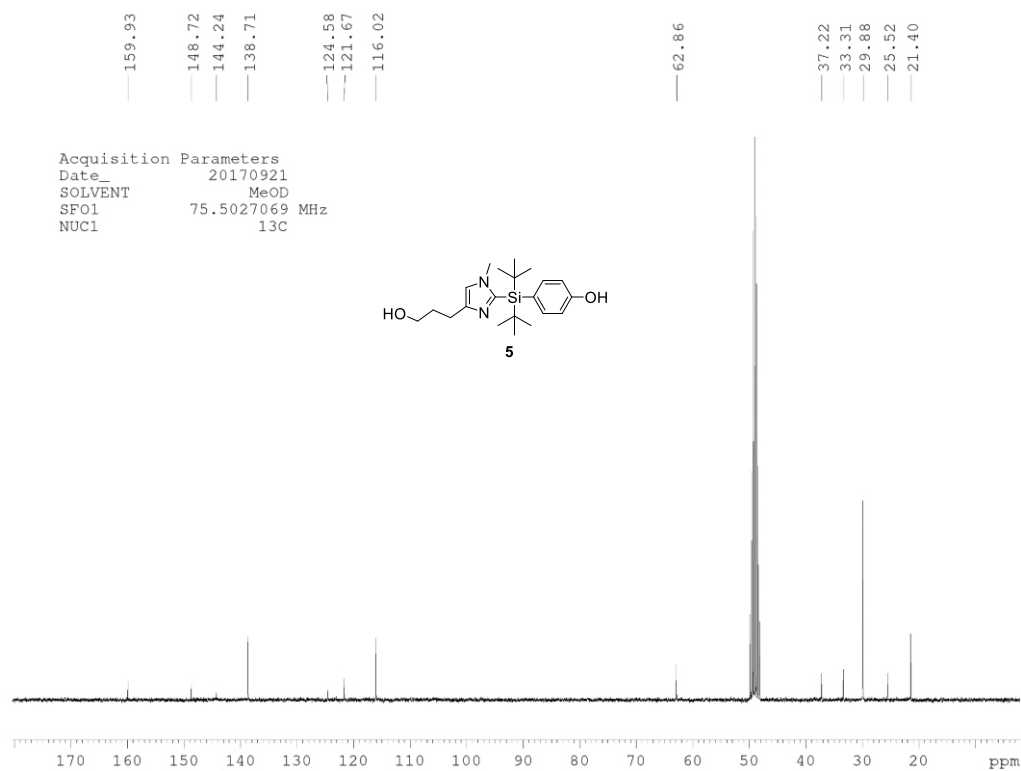

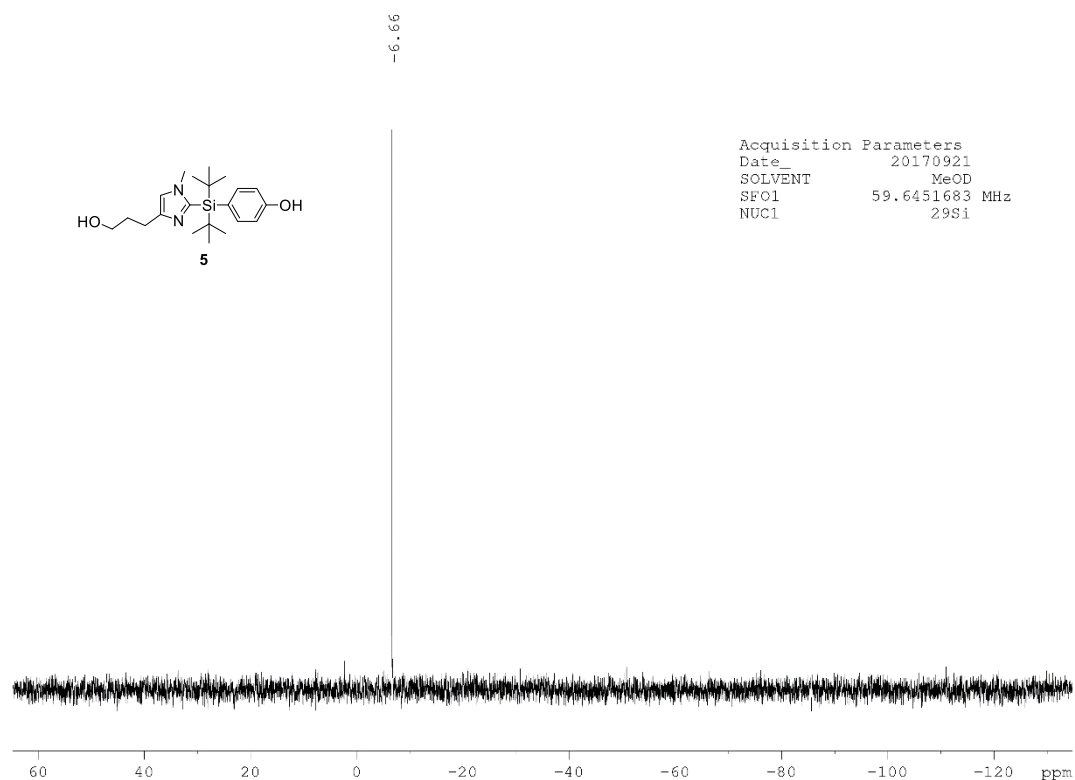

**3-(2-((4-(2-(2-(2-(Prop-2-ynoxy)ethoxy)ethoxy)ethoxy)phenyl)di-*tert*-butylsilyl)-1-methyl-1H-imidazol-4-yl)propan-1-ol 6**

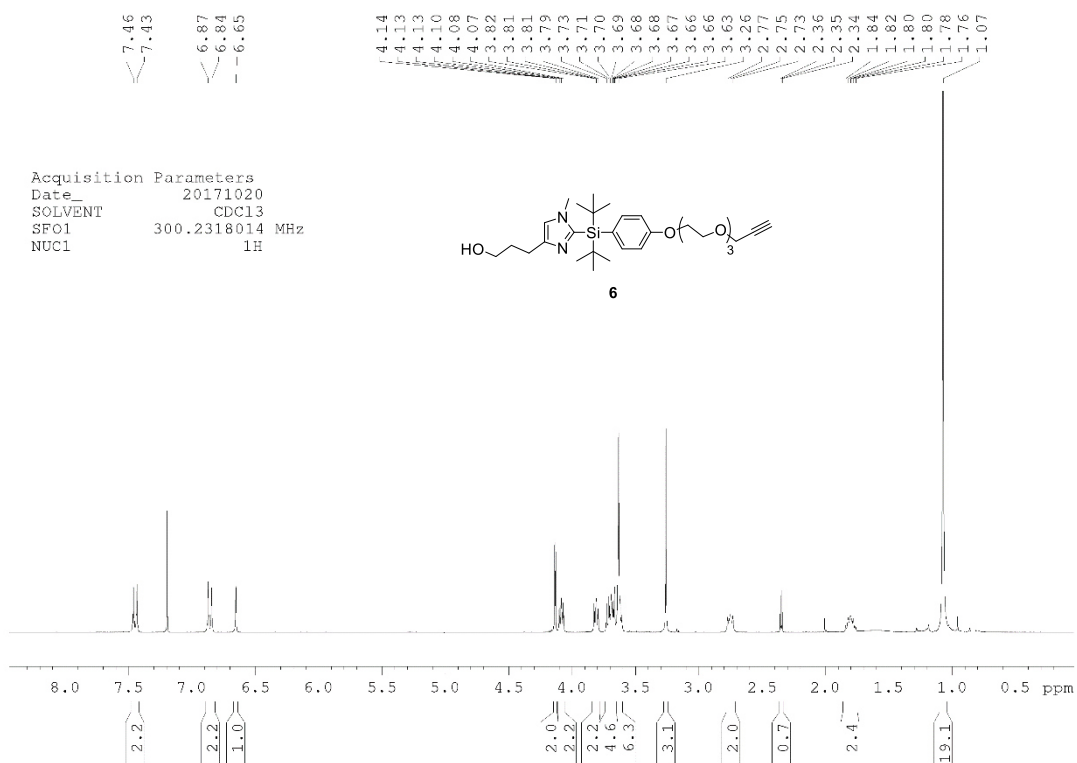

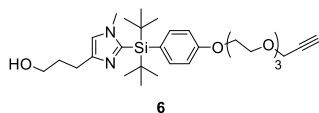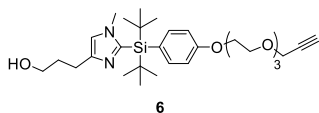



**(4-(2-(2-(2-(Prop-2-ynyloxy)ethoxy)ethoxy)ethoxy)phenyl)di-*tert*-butylfluorosilane 8**

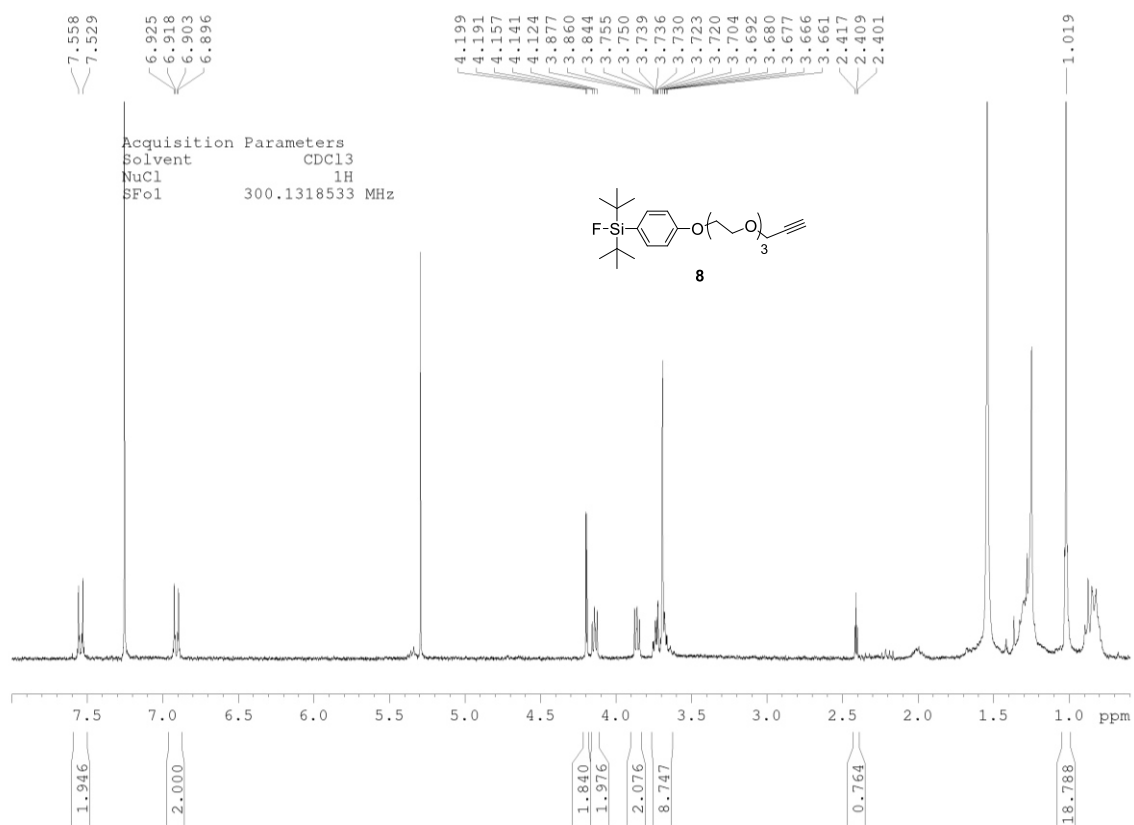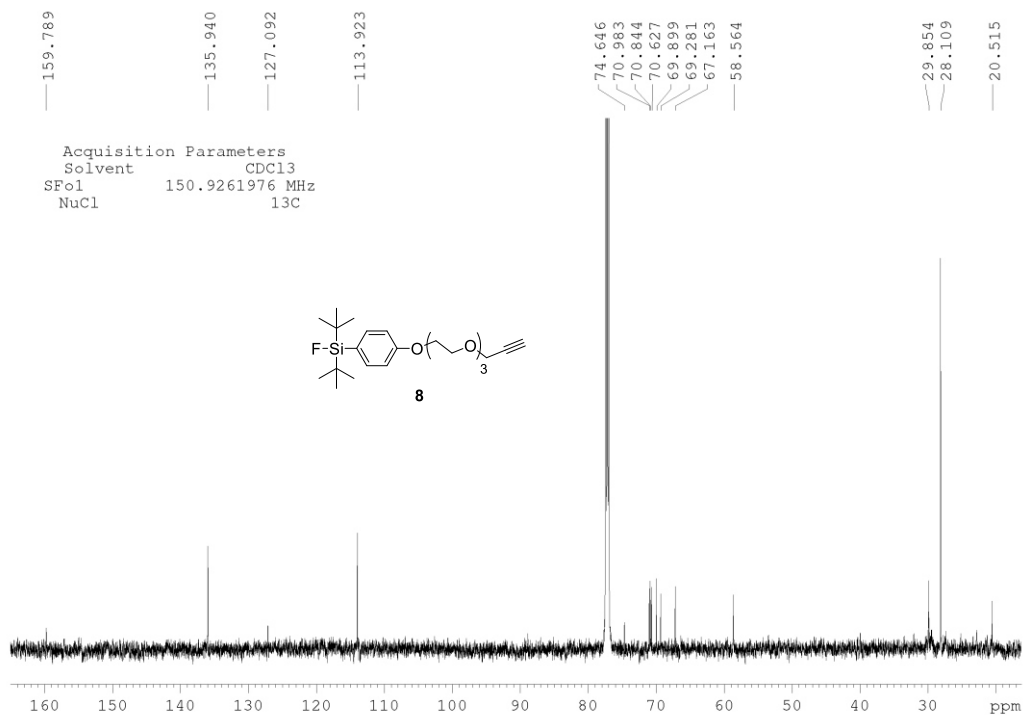

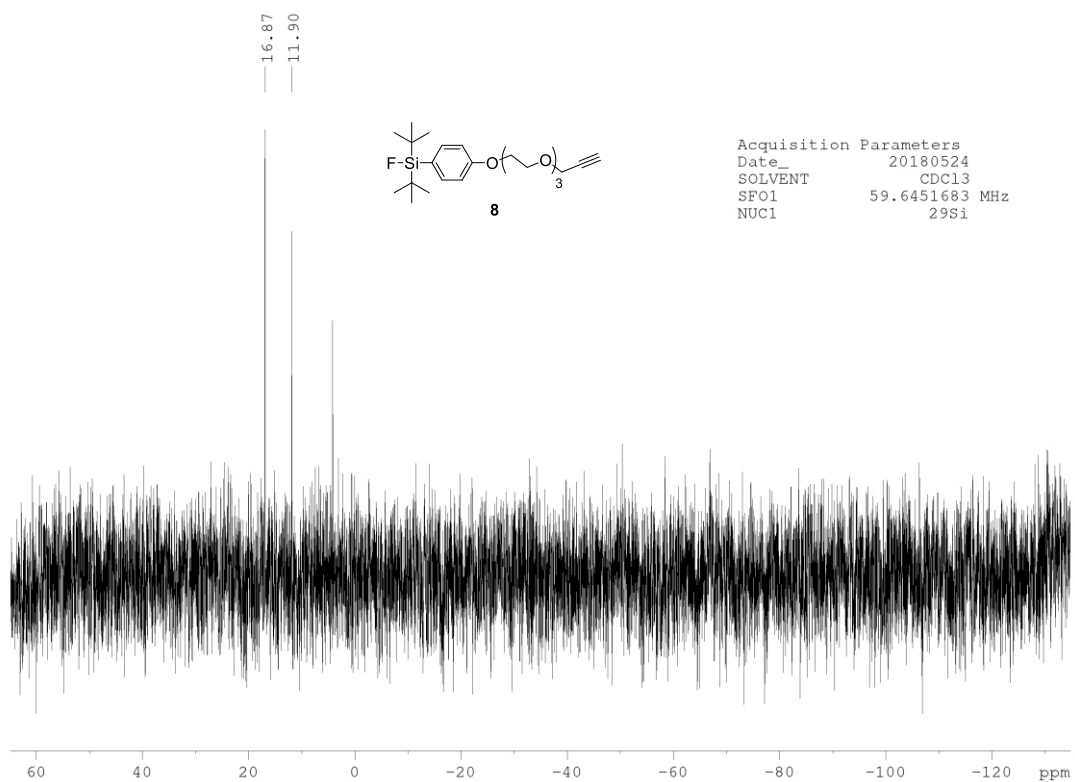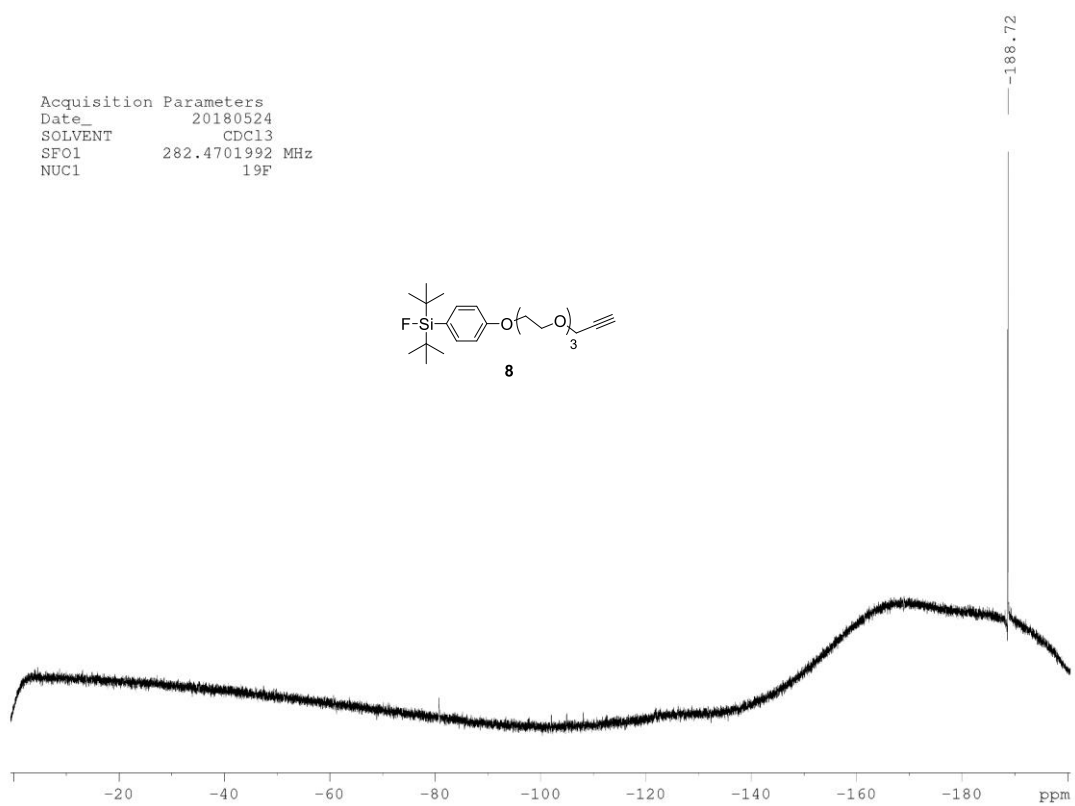

**3'-Deoxy-3'-[4-((2-(2-(4-(di-tert-butylfluorosilyl)phenoxy)ethoxy) ethoxy)ethoxy)methyl)-1H-1,2,3-triazol-1-yl]-thymidine 11a**

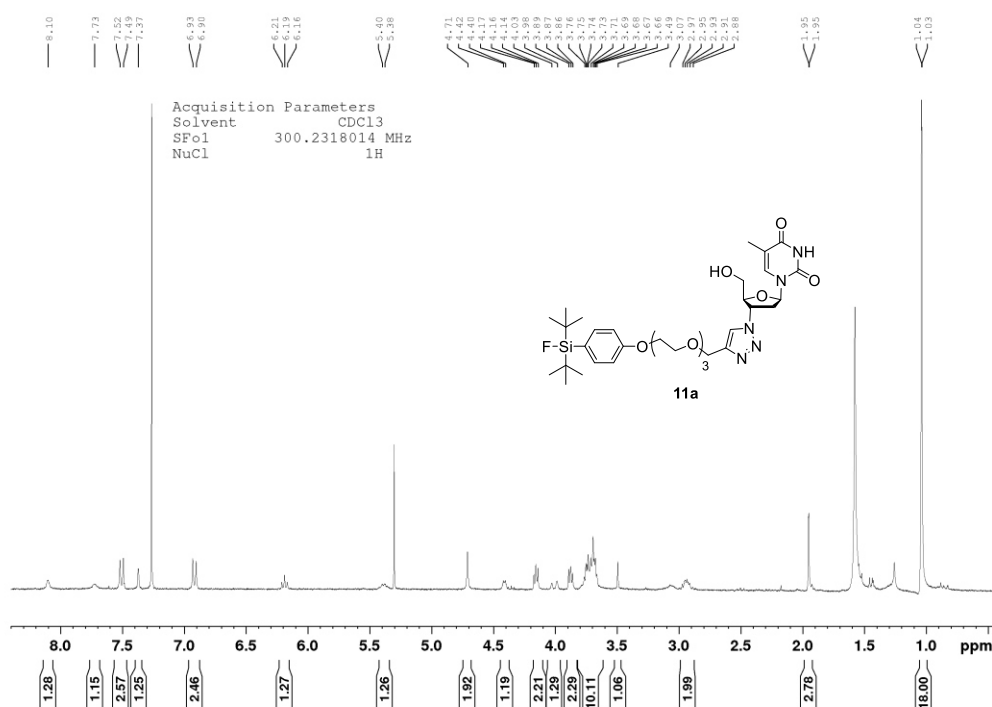

**$\beta$ -D-1-Deoxy-1-[4-((2-(2-(2-(4-(di-tert-butylfluorosilyl)phenoxy)ethoxy)ethoxy)ethoxy)methyl)-1H-1,2,3-triazol-1-yl]-glucopyranose 11b**

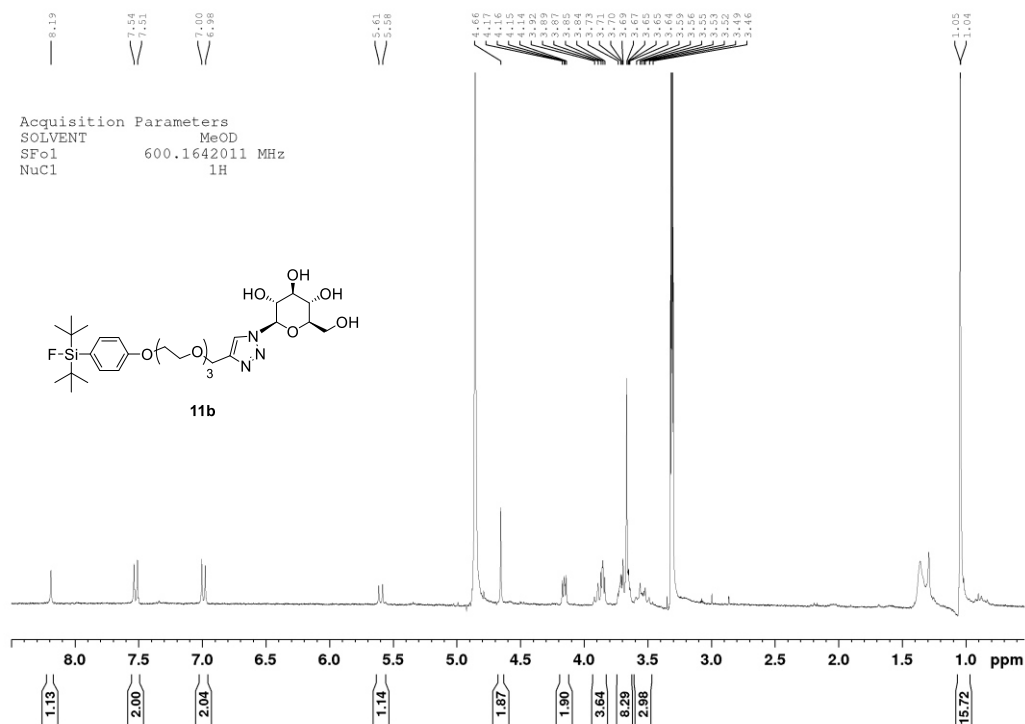

**N-[3-(4-((2-(2-(2-(4-(di-tert-butylfluorosilyl)phenoxy)ethoxy)ethoxy)ethoxy)methyl)-1H-1,2,3-triazol-1-yl)propanyl]-biotinamide 11c**

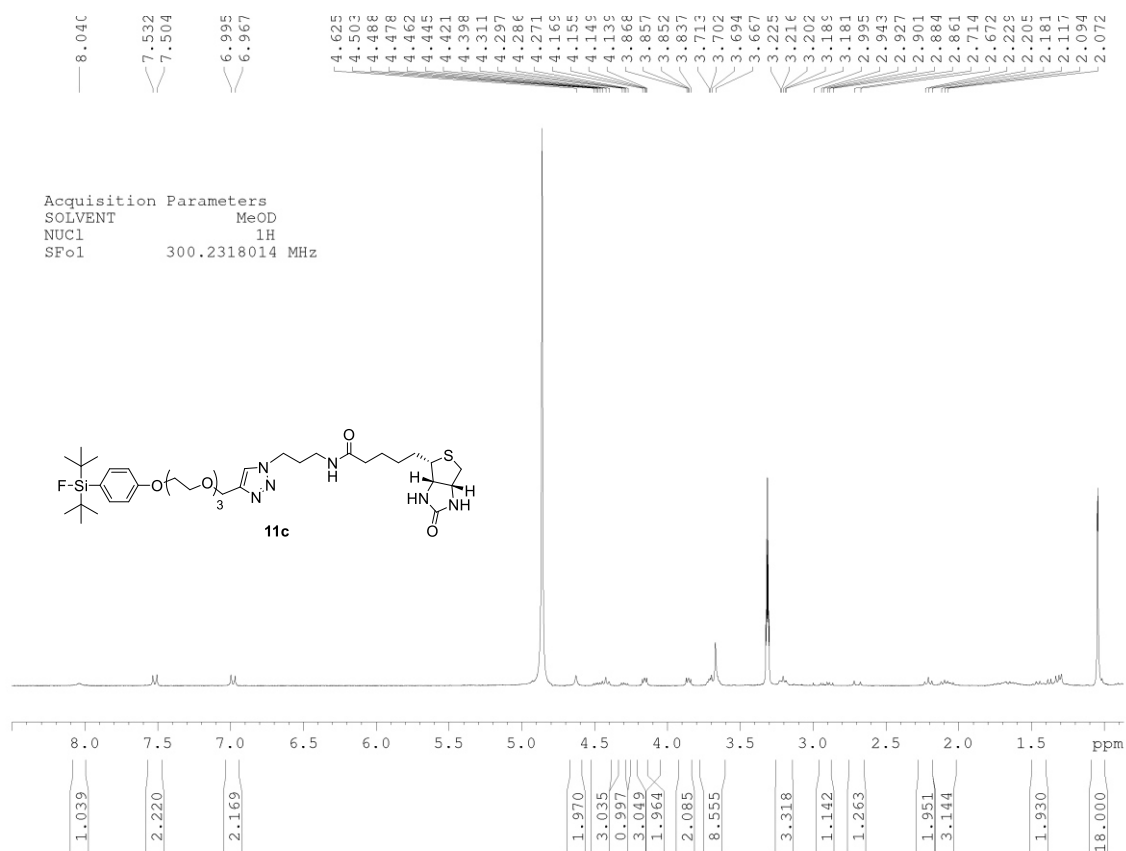

**17-(4-((2-(2-(2-(4-(di-tert-butylfluorosilyl)phenoxy)ethoxy)ethoxy)ethoxy)methyl)-1H-1,2,3-triazol-1-yl)ethoxy)ethoxy)ethoxy)phenyl)ethynyl)-estradiol 11d**

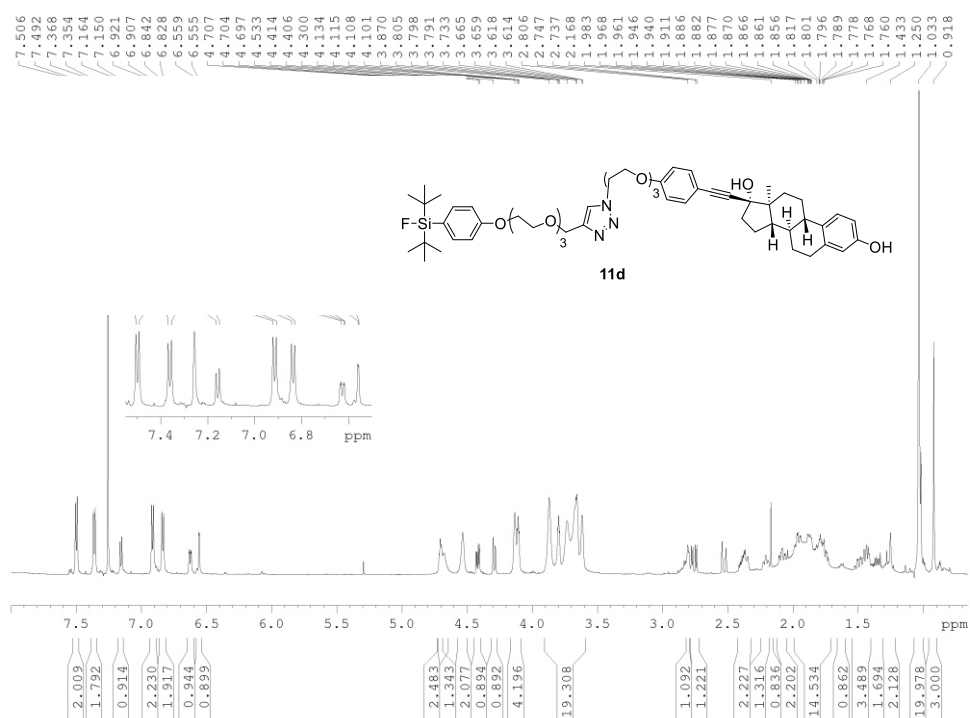

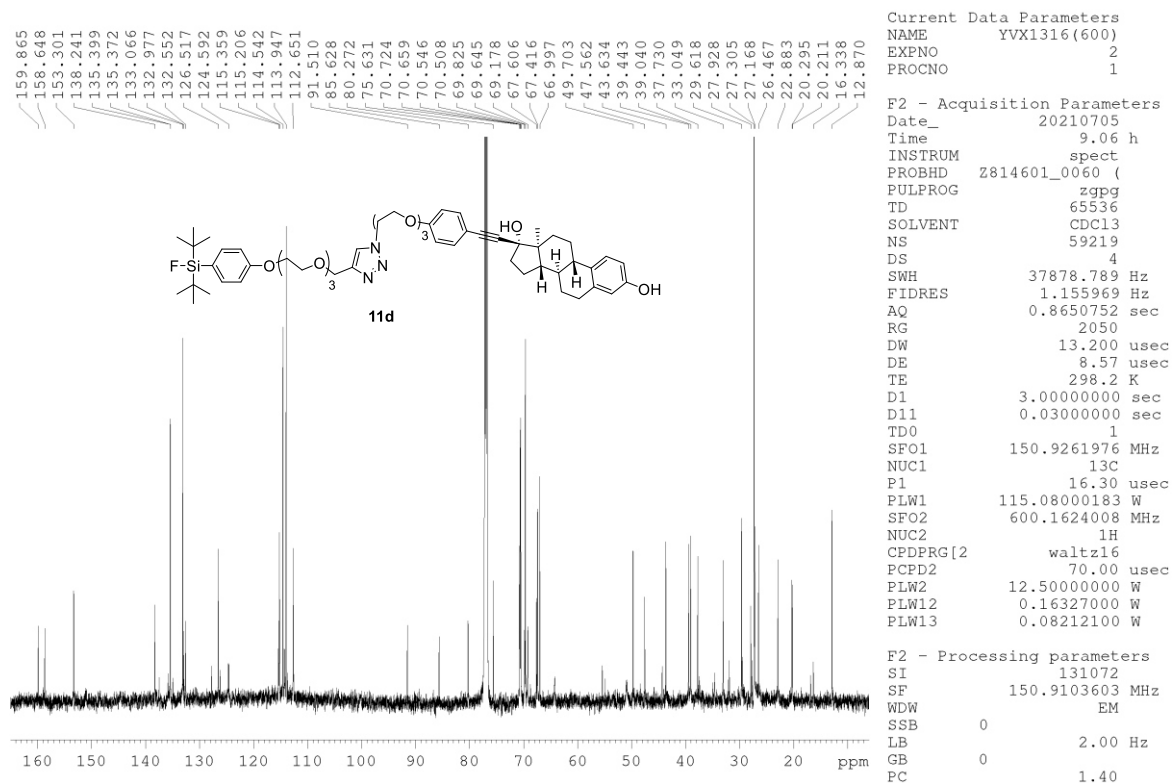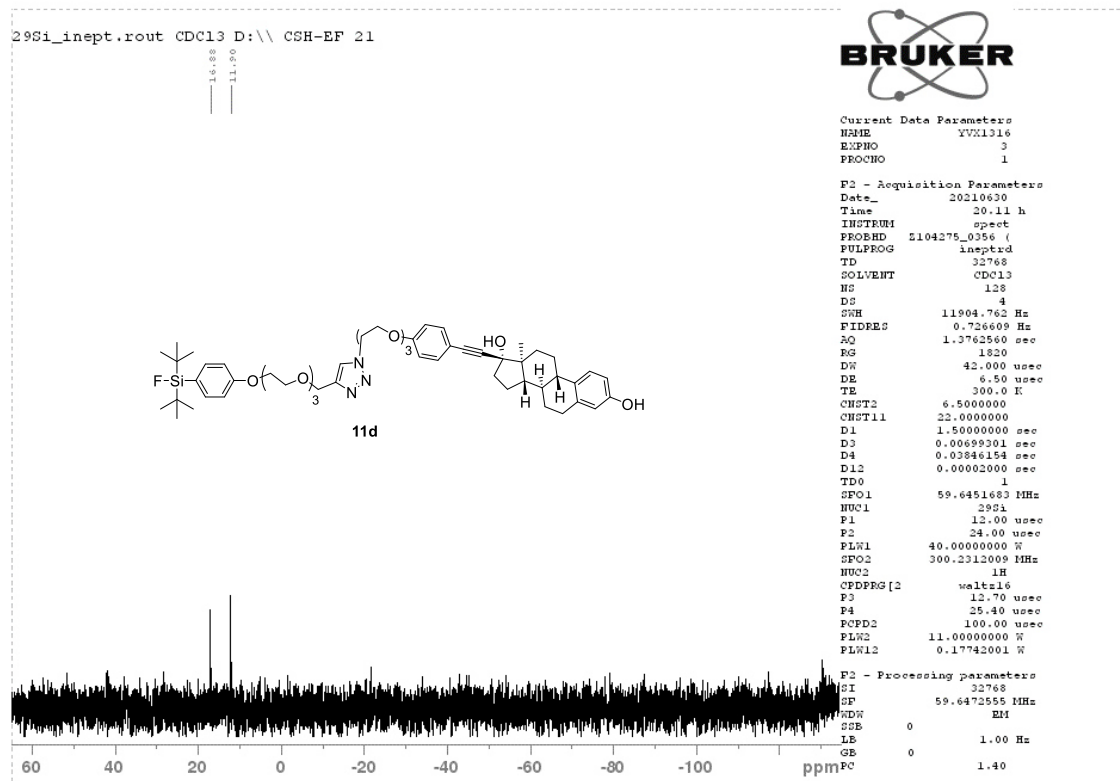

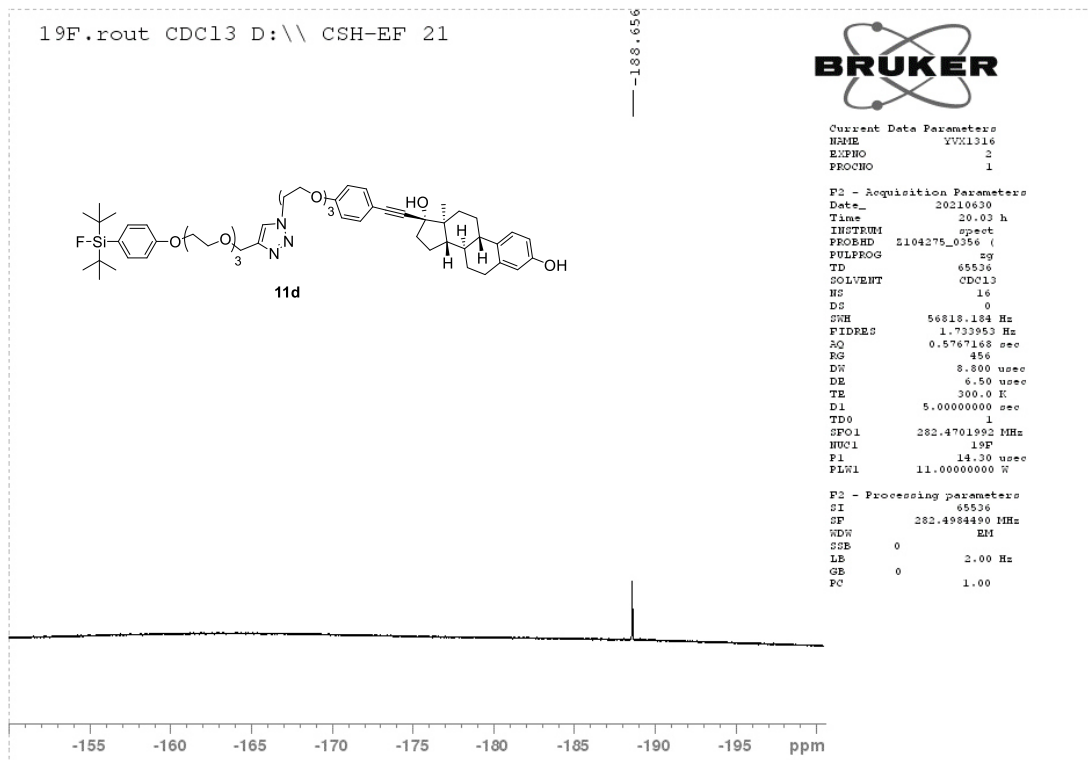

Supplement: d2cc03258a1.pdf [file d2cc03258a1.pdf]
